# Supplementary material for: Genome-wide identification of TAL1's functional targets: Insights into its mechanisms of action in primary erythroid cells
Source: HighWire-hosted journal article supplement (doi:10.1101/gr.104935.110), 2010-06-21
Supplement: Suppl_Figure_S1.pdf [file Suppl_Figure_S1.pdf]

■ WT/WT  
■ RER/RER

*Alas2*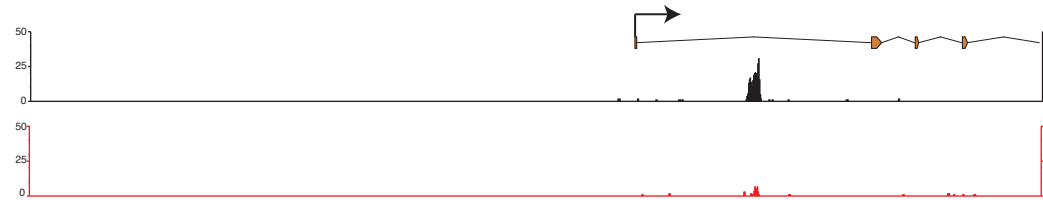*Alad*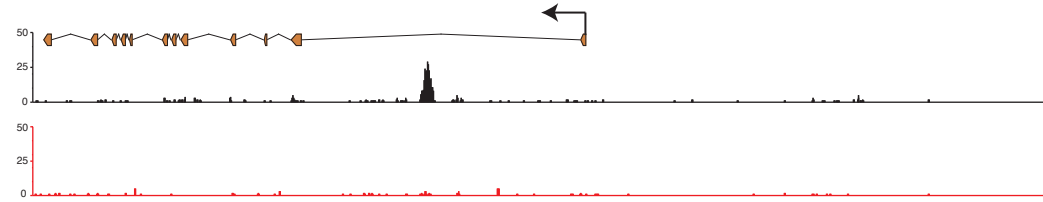*Hmbs*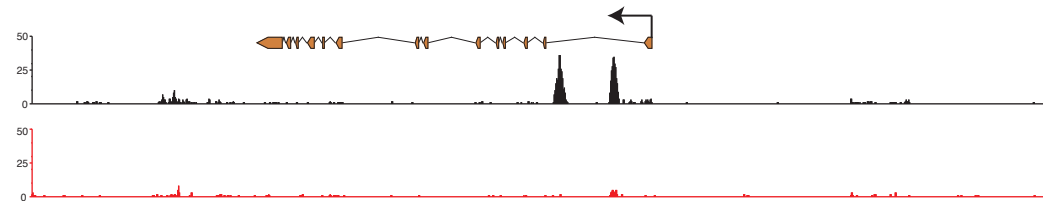*Uros*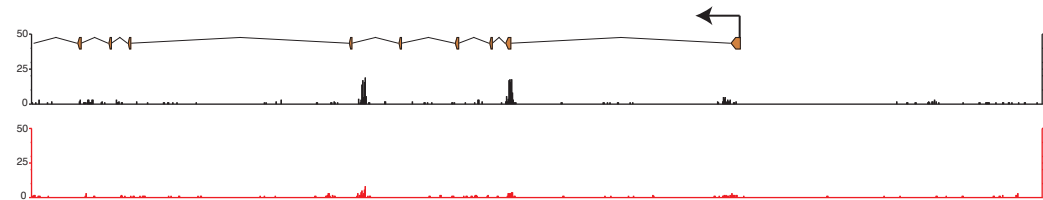*Urod*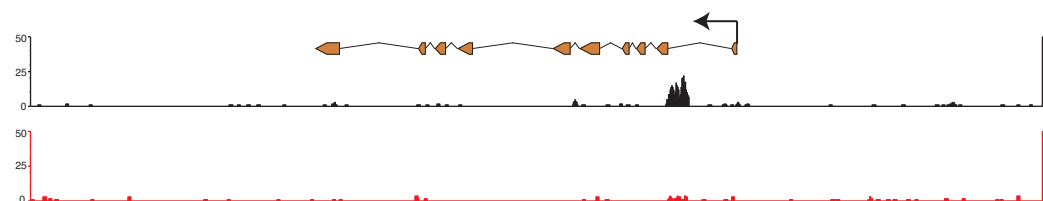*Cpox*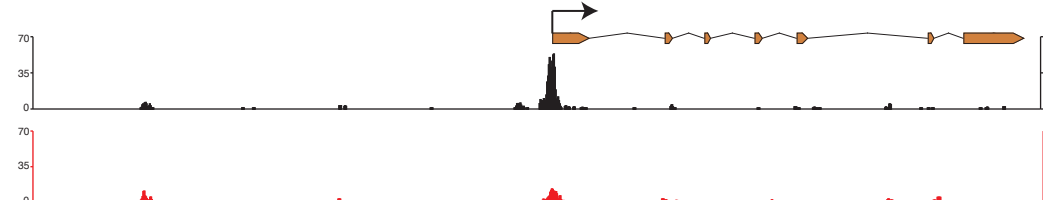*Ppox*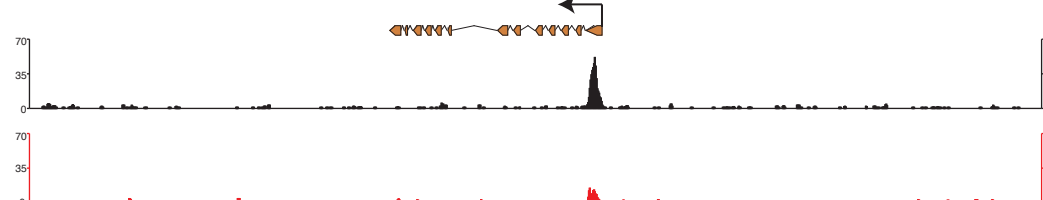*Fech*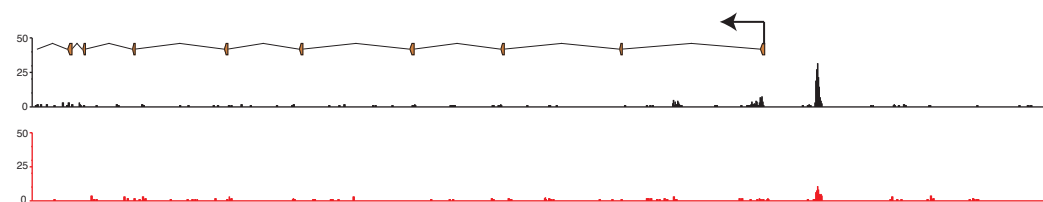

### Supplementary Figure S1. Profile of Tal1 binding on gene loci coding for the haem pathway enzymes

For each locus are shown (from top to bottom): the RefSeq annotation of the gene or part of the gene (in orange, exons; thin lines, introns; arrow, position of the TSS); the ChIP-Seq profiles in *Tal1*<sup>WT/WT</sup> (black tracks) and *Tal1*<sup>RER/RER</sup> (red tracks) cells.
