# Supplementary material for: Genome-wide identification of TAL1's functional targets: Insights into its mechanisms of action in primary erythroid cells
Source: HighWire-hosted journal article supplement (doi:10.1101/gr.104935.110), 2010-06-21
Supplement: Suppl_Figure_S2.pdf [file Suppl_Figure_S2.pdf]

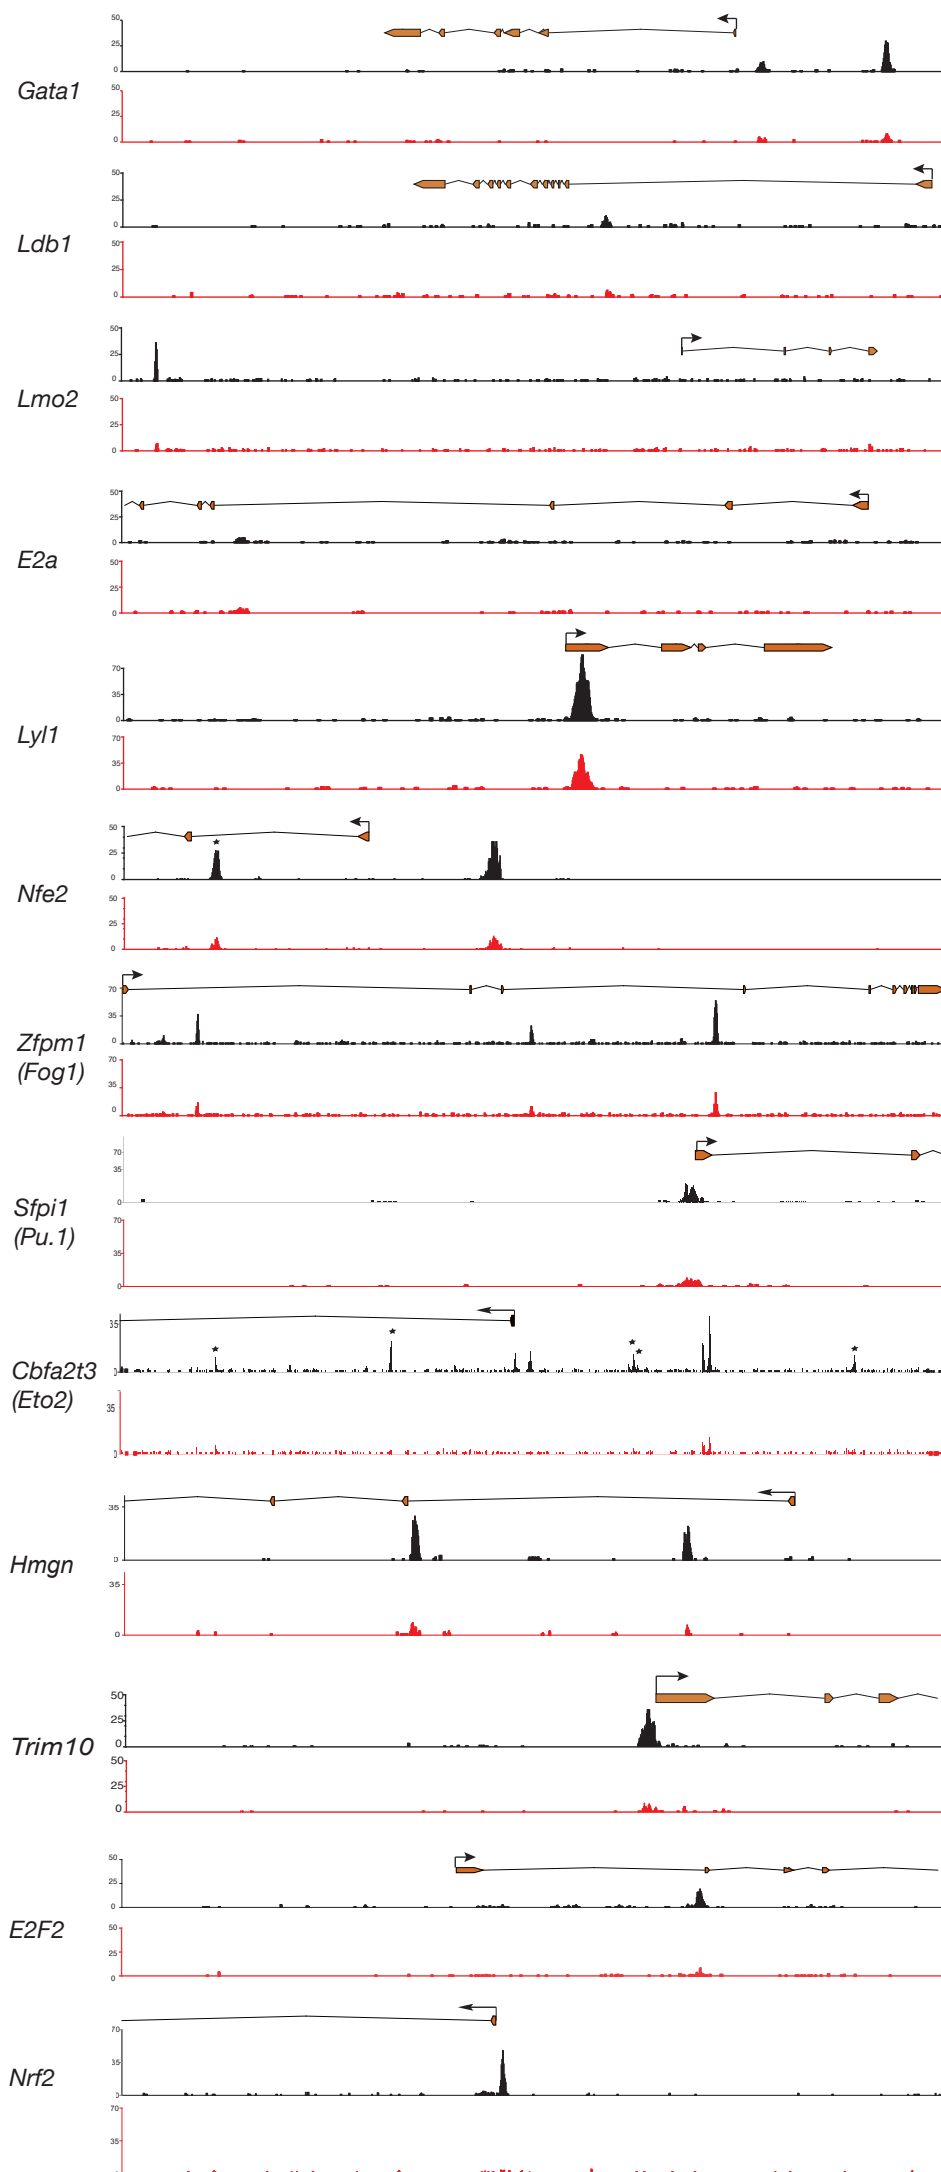

**Supplementary Figure S2. Profile of TAL1 binding on gene loci coding for transcription factors with functions in erythropoiesis**

For each locus are shown (from top to bottom): the RefSeq annotation of the gene or part of the gene (in orange, exons; thin lines, introns; arrow, position of the TSS); ChIP-SEQ profiles in *Tal1*<sup>WT/WT</sup> (black tracks) and *Tal1*<sup>RER/RER</sup> (red tracks) cells. Stars indicate peaks that are present specifically in erythroid cells in loci also bound by Tal1 in early haematopoietic cells (Wilson et al. 2009. *Blood* 113: 5456-5465).
