# Supplementary material for: Genome-wide identification of TAL1's functional targets: Insights into its mechanisms of action in primary erythroid cells
Source: HighWire-hosted journal article supplement (doi:10.1101/gr.104935.110), 2010-06-21
Supplement: Suppl_Table_6.pdf [file Suppl_Table_6.pdf]

**Supplementary Table 6. Processes associated to the 2037 SCL candidate target genes**

| ID           | Symbol            | Entrez Gene Name                                                  | Process  |
|--------------|-------------------|-------------------------------------------------------------------|----------|
| NM_178114    | AMIGO2            | adhesion molecule with Ig-like domain 2                           | adhesion |
| NM_033474    | ARVCF             | armadillo repeat gene deletes in velocardiofacial syndrome        | adhesion |
| NM_027060    | BTBD9             | BTB (POZ) domain containing 9                                     | adhesion |
| NM_001039149 | CD226             | CD226 molecule                                                    | adhesion |
| NM_010581    | CD47              | CD47 molecule                                                     | adhesion |
| NM_023370    | CDH23             | cadherin-like 23                                                  | adhesion |
| NM_207298    | CERCAM            | cerebral endothelial cell adhesion molecule                       | adhesion |
| NM_021719    | CLDN15            | claudin 15                                                        | adhesion |
| NM_009902    | CLDN3             | claudin 3                                                         | adhesion |
| NM_008779    | CNTN3             | contactin 3 (plasmacytoma associated)                             | adhesion |
| NM_015734    | COL5A1            | collagen, type V, alpha 1                                         | adhesion |
| NM_007803    | CTTN              | cortactin                                                         | adhesion |
| NM_009142    | CX3CL1            | chemokine (C-X3-C motif) ligand 1                                 | adhesion |
| NM_031174    | DSCAM             | Down syndrome cell adhesion molecule                              | adhesion |
| NM_145158    | EMILIN2           | elastin microfibril interfacer 2                                  | adhesion |
| NM_001081286 | FAT1              | FAT tumor suppressor homolog 1 (Drosophila)                       | adhesion |
| NM_001080814 | FAT3              | FAT tumor suppressor homolog 3 (Drosophila)                       | adhesion |
| NM_153795    | FERMT3            | fermitin family homolog 3 (Drosophila)                            | adhesion |
| NM_010494    | ICAM2             | intercellular adhesion molecule 2                                 | adhesion |
| NM_023892    | ICAM4 (includes E | intercellular adhesion molecule 4 (Landsteiner-Wiener blood group | adhesion |
| NM_001001979 | MEGF10            | multiple EGF-like-domains 10                                      | adhesion |
| NM_172522    | MEGF11            | multiple EGF-like-domains 11                                      | adhesion |
| NM_010739    | MUC13             | mucin 13, cell surface associated                                 | adhesion |
| NM_013610    | NINJ1             | ninjurin 1                                                        | adhesion |
| NM_016718    | NINJ2             | ninjurin 2                                                        | adhesion |
| NM_172932    | NLGN3             | neuroligin 3                                                      | adhesion |
| NM_153424    | NPHP4             | nephronophthisis 4                                                | adhesion |
| NM_009145    | NPTN              | neuroplastin                                                      | adhesion |
| NM_008751    | NXPH1             | neurexophilin 1                                                   | adhesion |
| NM_133167    | PARVB             | parvin, beta                                                      | adhesion |
| NM_019645    | PKP1              | plakophilin 1 (ectodermal dysplasia/skin fragility syndrome)      | adhesion |
| NM_001033319 | PPFIA1            | protein tyrosine phosphatase, receptor type, f polypeptide (PTPRF | adhesion |
| NM_153790    | SCARF2            | scavenger receptor class F, member 2                              | adhesion |
| NM_013660    | SEMA4D            | sema domain, immunoglobulin domain (Ig), transmembrane doma       | adhesion |
| NM_144539    | SLAMF7            | SLAM family member 7                                              | adhesion |

|              |                    |                                                                                    |          |
|--------------|--------------------|------------------------------------------------------------------------------------|----------|
| NM_177839    | TNN                | tenascin N                                                                         | adhesion |
| NM_172955    | VCAN               | versican                                                                           | adhesion |
| NM_025659    | ABI3               | ABI family, member 3                                                               | adhesion |
| NM_007393    | ACTB               | actin, beta                                                                        | adhesion |
| NM_009609    | ACTG1              | actin, gamma 1                                                                     | adhesion |
| NM_001111059 | CD34               | CD34 molecule                                                                      | adhesion |
| NM_001039150 | CD44               | CD44 molecule (Indian blood group)                                                 | adhesion |
| NM_011925    | CD97               | CD97 molecule                                                                      | adhesion |
| NM_023878    | CLDN10             | claudin 10                                                                         | adhesion |
| NM_020504    | CLDN13             | claudin 13                                                                         | adhesion |
| NM_019948    | CLEC4E             | C-type lectin domain family 4, member E                                            | adhesion |
| NM_009929    | COL18A1            | collagen, type XVIII, alpha 1                                                      | adhesion |
| NM_007733    | COL19A1            | collagen, type XIX, alpha 1                                                        | adhesion |
| NM_007734    | COL4A3             | collagen, type IV, alpha 3 (Goodpasture antigen)                                   | adhesion |
| NM_013848    | ERMAP              | erythroblast membrane-associated protein (Scianna blood group)                     | adhesion |
| NM_010326    | GP1BA              | glycoprotein Ib (platelet), alpha polypeptide                                      | adhesion |
| NM_008148    | GP5                | glycoprotein V (platelet)                                                          | adhesion |
| NM_018762    | GP9                | glycoprotein IX (platelet)                                                         | adhesion |
| NM_010562    | ILK                | integrin-linked kinase                                                             | adhesion |
| NM_010575    | ITGA2B (includes B | integrin, alpha 2b (platelet glycoprotein IIb of IIb/IIIa complex, antigen)        | adhesion |
| NM_010576    | ITGA4              | integrin, alpha 4 (antigen CD49D, alpha 4 subunit of VLA-4 receptor)               | adhesion |
| NM_008400    | ITGAL              | integrin, alpha L (antigen CD11A (p180), lymphocyte function-associated antigen 3) | adhesion |
| NM_008404    | ITGB2              | integrin, beta 2 (complement component 3 receptor 3 and 4 subunit)                 | adhesion |
| NM_008405    | ITGB2L             | integrin beta 2-like                                                               | adhesion |
| NM_013566    | ITGB7              | integrin, beta 7                                                                   | adhesion |
| NM_008410    | ITM2B              | integral membrane protein 2B                                                       | adhesion |
| NM_001081171 | LAMA5              | laminin, alpha 5                                                                   | adhesion |
| NM_008495    | LGALS1             | lectin, galactoside-binding, soluble, 1                                            | adhesion |
| NM_011150    | LGALS3BP           | lectin, galactoside-binding, soluble, 3 binding protein                            | adhesion |
| NM_053247    | LYVE1              | lymphatic vessel endothelial hyaluronan receptor 1                                 | adhesion |
| NM_021500    | MAEA               | macrophage erythroblast attacher                                                   | adhesion |
| NM_001081160 | MDGA1              | MAM domain containing glycosylphosphatidylinositol anchor 1                        | adhesion |
| NM_008626    | MRC2               | mannose receptor, C type 2                                                         | adhesion |
| NM_008630    | MT1E               | metallothionein 1E                                                                 | adhesion |
| NM_001077406 | NRP2               | neuropilin 2                                                                       | adhesion |
| NM_172544    | NRXN3              | neurexin 3                                                                         | adhesion |
| NM_019932    | PF4                | platelet factor 4                                                                  | adhesion |

|              |                   |                                                                   |           |
|--------------|-------------------|-------------------------------------------------------------------|-----------|
| NM_029094    | PIK3CB            | phosphoinositide-3-kinase, catalytic, beta polypeptide            | adhesion  |
| NM_008948    | PSMC3             | proteasome (prosome, macropain) 26S subunit, ATPase, 3            | adhesion  |
| NM_011261    | RELN              | reelin                                                            | adhesion  |
| NM_009073    | ROM1              | retinal outer segment membrane protein 1                          | adhesion  |
| NM_016741    | SCARB1            | scavenger receptor class B, member 1                              | adhesion  |
| NM_013659    | SEMA4B            | sema domain, immunoglobulin domain (Ig), transmembrane domain     | adhesion  |
| NM_009262    | SPOCK1            | sparc/osteonectin, cwcv and kazal-like domains proteoglycan (test | adhesion  |
| NM_052994    | SPOCK2            | sparc/osteonectin, cwcv and kazal-like domains proteoglycan (test | adhesion  |
| NM_001001183 | TMEM204           | transmembrane protein 204                                         | adhesion  |
| NM_001083587 | TNS3              | tensin 3                                                          | adhesion  |
| NM_133234    | BBC3              | BCL2 binding component 3                                          | apoptosis |
| NM_153516    | BCL2L13           | BCL2-like 13 (apoptosis facilitator)                              | apoptosis |
| NM_007544    | BID               | BH3 interacting domain death agonist                              | apoptosis |
| NM_007464    | BIRC3             | baculoviral IAP repeat-containing 3                               | apoptosis |
| NM_009761    | BNIP3L            | BCL2/adenovirus E1B 19kDa interacting protein 3-like              | apoptosis |
| NM_009808    | CASP12 (includes  | caspase 12                                                        | apoptosis |
| NM_001128151 | CECR2             | cat eye syndrome chromosome region, candidate 2                   | apoptosis |
| NM_009950    | CRADD             | CASP2 and RIPK1 domain containing adaptor with death domain       | apoptosis |
| NM_010015    | DAD1              | defender against cell death 1                                     | apoptosis |
| NM_134062    | DAPK1             | death-associated protein kinase 1                                 | apoptosis |
| NM_010019    | DAPK2 (includes E | death-associated protein kinase 2                                 | apoptosis |
| NM_007916    | DDX19A            | DEAD (Asp-Glu-Ala-As) box polypeptide 19A                         | apoptosis |
| NM_010100    | EDAR              | ectodysplasin A receptor                                          | apoptosis |
| NM_172611    | GRAMD4            | GRAM domain containing 4                                          | apoptosis |
| NM_021347    | GSDMA             | gasdermin A                                                       | apoptosis |
| NM_010745    | LY86              | lymphocyte antigen 86                                             | apoptosis |
| NM_008562    | MCL1              | myeloid cell leukemia sequence 1 (BCL2-related)                   | apoptosis |
| NM_008243    | MST1              | macrophage stimulating 1 (hepatocyte growth factor-like)          | apoptosis |
| NM_011586    | MYO18A (includes  | myosin XVIIIa                                                     | apoptosis |
| NM_023312    | NDUFA13           | NADH dehydrogenase (ubiquinone) 1 alpha subcomplex, 13            | apoptosis |
| NM_027438    | PNMA1             | paraneoplastic antigen MA1                                        | apoptosis |
| NM_026097    | RFFL              | ring finger and FYVE-like domain containing 1                     | apoptosis |
| NM_019464    | SH3GLB1           | SH3-domain GRB2-like endophilin B1                                | apoptosis |
| NM_013929    | SIVA1             | SIVA1, apoptosis-inducing factor                                  | apoptosis |
| NM_009652    | AKT1              | v-akt murine thymoma viral oncogene homolog 1                     | apoptosis |
| NM_010241    | AKTIP             | AKT interacting protein                                           | apoptosis |
| NM_009754    | BCL2L11           | BCL2-like 11 (apoptosis facilitator)                              | apoptosis |

|              |                              |                                                                                              |            |
|--------------|------------------------------|----------------------------------------------------------------------------------------------|------------|
| NM_001012273 | BIRC5                        | baculoviral IAP repeat-containing 5                                                          | apoptosis  |
| NM_134059    | DDX41                        | DEAD (Asp-Glu-Ala-Asp) box polypeptide 41                                                    | apoptosis  |
| NM_023913    | ERN1 (includes ERG1)         | endoplasmic reticulum to nucleus signaling 1                                                 | apoptosis  |
| NM_028680    | IFT57                        | intraflagellar transport 57 homolog (Chlamydomonas)                                          | apoptosis  |
| NM_010844    | MUC5AC                       | mucin 5AC, oligomeric mucus/gel-forming                                                      | apoptosis  |
| NM_009344    | PHLDA1                       | pleckstrin homology-like domain, family A, member 1                                          | apoptosis  |
| NM_008842    | PIM1                         | pim-1 oncogene                                                                               | apoptosis  |
| NM_011625    | PPP1R13B                     | protein phosphatase 1, regulatory (inhibitor) subunit 13B                                    | apoptosis  |
| NM_008654    | PPP1R15A (includes PPP1R15B) | protein phosphatase 1, regulatory (inhibitor) subunit 15A                                    | apoptosis  |
| NM_017374    | PPP2CB                       | protein phosphatase 2 (formerly 2A), catalytic subunit, beta isoform                         | apoptosis  |
| NM_153405    | RBM45                        | RNA binding motif protein 45                                                                 | apoptosis  |
| NM_177073    | RELT                         | RELT tumor necrosis factor receptor                                                          | apoptosis  |
| NM_021540    | RNF130                       | ring finger protein 130                                                                      | apoptosis  |
| NM_080561    | RNF216                       | ring finger protein 216                                                                      | apoptosis  |
| NM_053157    | TM2D1                        | TM2 domain containing 1                                                                      | apoptosis  |
| NM_009396    | TNFAIP2                      | tumor necrosis factor, alpha-induced protein 2                                               | apoptosis  |
| NM_134131    | TNFAIP8                      | tumor necrosis factor, alpha-induced protein 8                                               | apoptosis  |
| NM_144551    | TRIB2                        | tribbles homolog 2 (Drosophila)                                                              | apoptosis  |
| NM_175093    | TRIB3                        | tribbles homolog 3 (Drosophila)                                                              | apoptosis  |
| NM_001081636 | CCND3                        | cyclin D3                                                                                    | cell cycle |
| NM_007633    | CCNE1                        | cyclin E1                                                                                    | cell cycle |
| NM_172839    | CCNJ                         | cyclin J                                                                                     | cell cycle |
| NM_019937    | CCNL1                        | cyclin L1                                                                                    | cell cycle |
| NM_028399    | CCNT2                        | cyclin T2                                                                                    | cell cycle |
| NM_053180    | CCRK                         | cell cycle related kinase                                                                    | cell cycle |
| NM_001081058 | CDC2L5                       | cell division cycle 2-like 5 (cholinesterase-related cell division control protein 2-like 5) | cell cycle |
| NM_011799    | CDC6                         | cell division cycle 6 homolog (S. cerevisiae)                                                | cell cycle |
| NM_183294    | CDKL1                        | cyclin-dependent kinase-like 1 (CDC2-related kinase)                                         | cell cycle |
| NM_028760    | CEP55                        | centrosomal protein 55kDa                                                                    | cell cycle |
| NM_026952    | CRKRS                        | Cdc2-related kinase, arginine/serine-rich                                                    | cell cycle |
| NM_146207    | CUL4A                        | cullin 4A                                                                                    | cell cycle |
| NM_027807    | CUL5                         | cullin 5                                                                                     | cell cycle |
| NM_025853    | DSN1                         | DSN1, MIND kinetochore complex component, homolog (S. cerevisiae)                            | cell cycle |
| NM_007836    | GADD45A                      | growth arrest and DNA-damage-inducible, alpha                                                | cell cycle |
| NM_011817    | GADD45G                      | growth arrest and DNA-damage-inducible, gamma                                                | cell cycle |
| NM_016692    | INCENP                       | inner centromere protein antigens 135/155kDa                                                 | cell cycle |
| NM_181404    | KANK1                        | KN motif and ankyrin repeat domains 1                                                        | cell cycle |

|              |        |                                                                   |            |
|--------------|--------|-------------------------------------------------------------------|------------|
| NM_183046    | KIF20B | kinesin family member 20B                                         | cell cycle |
| NM_177757    | KIF26B | kinesin family member 26B                                         | cell cycle |
| NM_008442    | KIF2A  | kinesin heavy chain member 2A                                     | cell cycle |
| NM_009600    | MACF1  | microtubule-actin crosslinking factor 1                           | cell cycle |
| NM_010752    | MAD1L1 | MAD1 mitotic arrest deficient-like 1 (yeast)                      | cell cycle |
| NM_007896    | MAPRE1 | microtubule-associated protein, RP/EB family, member 1            | cell cycle |
| NM_133350    | MAPRE3 | microtubule-associated protein, RP/EB family, member 3            | cell cycle |
| NM_001010833 | MDC1   | mediator of DNA damage checkpoint 1                               | cell cycle |
| NM_148922    | MDM1   | Mdm1 nuclear protein homolog (mouse)                              | cell cycle |
| NM_001081235 | MN1    | meningioma (disrupted in balanced translocation) 1                | cell cycle |
| NM_026735    | MOBK1A | MOB1, Mps One Binder kinase activator-like 1A (yeast)             | cell cycle |
| NM_145571    | MOBK1B | MOB1, Mps One Binder kinase activator-like 1B (yeast)             | cell cycle |
| NM_172457    | MOBK2A | MOB1, Mps One Binder kinase activator-like 2A (yeast)             | cell cycle |
| NM_001045529 | MORC3  | MORC family CW-type zinc finger 3                                 | cell cycle |
| NM_008675    | NBL1   | neuroblastoma, suppression of tumorigenicity 1                    | cell cycle |
| NM_178113    | NCAPD3 | non-SMC condensin II complex, subunit D3                          | cell cycle |
| NM_010892    | NEK2   | NIMA (never in mitosis gene a)-related kinase 2                   | cell cycle |
| NM_177898    | NEK5   | NIMA (never in mitosis gene a)-related kinase 5                   | cell cycle |
| NM_021606    | NEK6   | NIMA (never in mitosis gene a)-related kinase 6                   | cell cycle |
| NM_198654    | NSL1   | NSL1, MIND kinetochore complex component, homolog (S. cerevisiae) | cell cycle |
| NM_011050    | PDCD4  | programmed cell death 4 (neoplastic transformation inhibitor)     | cell cycle |
| NM_016910    | PPM1D  | protein phosphatase 1D magnesium-dependent, delta isoform         | cell cycle |
| NM_177167    | PPM1E  | protein phosphatase 1E (PP2C domain containing)                   | cell cycle |
| NM_024209    | PPP6C  | protein phosphatase 6, catalytic subunit                          | cell cycle |
| NM_019547    | RBM38  | RNA binding motif protein 38                                      | cell cycle |
| NM_173867    | RCC2   | regulator of chromosome condensation 2                            | cell cycle |
| NM_001013370 | SESN1  | sestrin 1                                                         | cell cycle |
| NM_144907    | SESN2  | sestrin 2                                                         | cell cycle |
| NM_011543    | SKP1   | S-phase kinase-associated protein 1                               | cell cycle |
| NM_008017    | SMC2   | structural maintenance of chromosomes 2                           | cell cycle |
| NM_007790    | SMC3   | structural maintenance of chromosomes 3                           | cell cycle |
| NM_009282    | STAG1  | stromal antigen 1                                                 | cell cycle |
| NM_016964    | STAG3  | stromal antigen 3                                                 | cell cycle |
| NM_172656    | STRADB | STE20-related kinase adaptor beta                                 | cell cycle |
| NM_052973    | STRN3  | striatin, calmodulin binding protein 3                            | cell cycle |
| NM_026780    | SYF2   | SYF2 homolog, RNA splicing factor (S. cerevisiae)                 | cell cycle |
| NM_177089    | TACC1  | transforming, acidic coiled-coil containing protein 1             | cell cycle |

|              |                          |                                                                                    |                                                                 |
|--------------|--------------------------|------------------------------------------------------------------------------------|-----------------------------------------------------------------|
| NM_001127233 | TP53                     | tumor protein p53                                                                  | cell cycle                                                      |
| NM_020002    | REC8                     | REC8 homolog (yeast)                                                               | cell division                                                   |
| NM_178644    | OAF                      | OAF homolog (Drosophila)                                                           | cell division                                                   |
| NM_174850    | MICALL2                  | MICAL-like 2                                                                       | cytoskeleton                                                    |
| NM_178598    | TAGLN2                   | transgelin 2                                                                       | cytoskeleton (smooth muscle)                                    |
| NM_178385    | TBCC                     | tubulin folding cofactor C                                                         | cytoskeleton (tubulin)                                          |
| NM_173038    | TBCEL                    | tubulin folding cofactor E-like                                                    | cytoskeleton (tubulin)                                          |
| NM_178787    | IFFO1                    | intermediate filament family orphan 1                                              | cytoskeleton organisation                                       |
| NM_183151    | MID1                     | midline 1 (Opitz/BBB syndrome)                                                     | cytoskeleton organisation                                       |
| NM_010878    | NCK1                     | NCK adaptor protein 1                                                              | cytoskeleton organisation                                       |
| NM_010879    | NCK2                     | NCK adaptor protein 2                                                              | cytoskeleton organisation                                       |
| NM_022656    | NISCH                    | nischarin                                                                          | cytoskeleton organisation                                       |
| NM_008733    | NRAP                     | nebulin-related anchoring protein                                                  | cytoskeleton organisation                                       |
| NM_011892    | SGCG                     | sarcoglycan, gamma (35kDa dystrophin-associated glycoprotein)                      | cytoskeleton organisation                                       |
| NM_001102444 | ADD1                     | adducin 1 (alpha)                                                                  | cytoskeleton organisation                                       |
| NM_013458    | ADD2                     | adducin 2 (beta)                                                                   | cytoskeleton organisation                                       |
| NM_013758    | ADD3                     | adducin 3 (gamma)                                                                  | cytoskeleton organisation                                       |
| NM_031158    | ANK1                     | ankyrin 1, erythrocytic                                                            | cytoskeleton organisation                                       |
| NM_021328    | BIN3                     | bridging integrator 3                                                              | cytoskeleton organisation                                       |
| NM_013513    | EPB42                    | erythrocyte membrane protein band 4.2                                              | cytoskeleton organisation                                       |
| NM_146100    | INA                      | internexin neuronal intermediate filament protein, alpha                           | cytoskeleton organisation                                       |
| NM_001038609 | MAPT                     | microtubule-associated protein tau                                                 | cytoskeleton organisation                                       |
| NM_023668    | NDEL1                    | nudE nuclear distribution gene E homolog (A. nidulans)-like 1                      | cytoskeleton organisation                                       |
| NM_011057    | PDGFB                    | platelet-derived growth factor beta polypeptide (simian sarcoma virus)             | cytoskeleton organisation                                       |
| NM_029303    | PFN3                     | profilin 3                                                                         | cytoskeleton organisation                                       |
| NM_172261    | PPP1R9B                  | protein phosphatase 1, regulatory (inhibitor) subunit 9B                           | cytoskeleton organisation                                       |
| NM_013831    | PSTPIP2                  | proline-serine-threonine phosphatase interacting protein 2                         | cytoskeleton organisation                                       |
| NM_009008    | RAC2                     | ras-related C3 botulinum toxin substrate 2 (rho family, small GTP binding protein) | cytoskeleton organisation                                       |
| NM_145824    | RANBP10                  | RAN binding protein 10                                                             | cytoskeleton organisation                                       |
| NM_026772    | CDC42EP2                 | CDC42 effector protein (Rho GTPase binding) 2                                      | cytoskeleton organisation (actin filament)                      |
| NM_020006    | CDC42EP4                 | CDC42 effector protein (Rho GTPase binding) 4                                      | cytoskeleton organisation (actin filament)                      |
| NM_026514    | CDC42EP3                 | CDC42 effector protein (Rho GTPase binding) 3                                      | cytoskeleton organisation (actin filament), signal transduction |
| NM_008538    | MARCKS (includes MARCKS) | myristoylated alanine-rich protein kinase C substrate                              | cytoskeleton organisation (actin filaments)                     |
| NM_008879    | LCP1                     | lymphocyte cytosolic protein 1 (L-plastin)                                         | cytoskeleton organisation (actin filaments) hematopoiesis       |
| NM_172118    | MYL9 (includes EGFP)     | myosin, light polypeptide 9, regulatory                                            | cytoskeleton organisation (actin-dependent motor protein)       |
| NM_175441    | MYLK3                    | myosin light chain kinase 3                                                        | cytoskeleton organisation (actin-dependent motor protein)       |
| NM_148413    | MYO3A                    | myosin IIIA                                                                        | cytoskeleton organisation (actin-dependent motor protein)       |

|              |                   |                                                                    |                                                       |
|--------------|-------------------|--------------------------------------------------------------------|-------------------------------------------------------|
| NM_177376    | MYO3B             | myosin IIIB                                                        | cytoskeleton organisation (actin-dependent motor prc  |
| NM_001081322 | MYO5C             | myosin VC                                                          | cytoskeleton organisation (actin-dependent motor prc  |
| NM_021883    | TMOD1             | tropomodulin 1                                                     | cytoskeleton organisation (actin, tropomyosin binding |
| NM_016963    | TMOD3             | tropomodulin 3 (ubiquitous)                                        | cytoskeleton organisation (actin, tropomyosin binding |
| NM_009798    | CAPZB             | capping protein (actin filament) muscle Z-line, beta               | cytoskeleton organisation (actin)                     |
| NM_001037711 | CGN               | cingulin                                                           | cytoskeleton organisation (actin)                     |
| NM_080285    | CTTNBP2           | cortactin binding protein 2                                        | cytoskeleton organisation (actin)                     |
| NM_172464    | DAAM1             | dishevelled associated activator of morphogenesis 1                | cytoskeleton organisation (actin)                     |
| NM_007858    | DIAPH1            | diaphanous homolog 1 (Drosophila)                                  | cytoskeleton organisation (actin)                     |
| NM_007862    | DLG1              | discs, large homolog 1 (Drosophila)                                | cytoskeleton organisation (actin)                     |
| NM_033374    | DOCK2             | dedicator of cytokinesis 2                                         | cytoskeleton organisation (actin)                     |
| NM_080288    | ELMO1             | engulfment and cell motility 1                                     | cytoskeleton organisation (actin)                     |
| NM_001128607 | EPB41             | erythrocyte membrane protein band 4.1 (elliptocytosis 1, RH-linked | cytoskeleton organisation (actin)                     |
| NM_013514    | EPB49             | erythrocyte membrane protein band 4.9 (dematin)                    | cytoskeleton organisation (actin)                     |
| NM_015759    | FGD3              | FYVE, RhoGEF and PH domain containing 3                            | cytoskeleton organisation (actin)                     |
| NM_053072    | FGD6              | FYVE, RhoGEF and PH domain containing 6                            | cytoskeleton organisation (actin)                     |
| NM_001033301 | FHDC1             | FH2 domain containing 1                                            | cytoskeleton organisation (actin)                     |
| NM_001131020 | GFAP              | glial fibrillary acidic protein                                    | cytoskeleton organisation (actin)                     |
| NM_027671    | SNTG1             | syntrophin, gamma 1                                                | cytoskeleton organisation (actin)                     |
| NM_194355    | SPIRE1            | spire homolog 1 (Drosophila)                                       | cytoskeleton organisation (actin)                     |
| NM_011465    | SPTA1             | spectrin, alpha, erythrocytic 1 (elliptocytosis 2)                 | cytoskeleton organisation (actin)                     |
| NM_013675    | SPTB              | spectrin, beta, erythrocytic                                       | cytoskeleton organisation (actin)                     |
| NM_009260    | SPTBN1            | spectrin, beta, non-erythrocytic 1                                 | cytoskeleton organisation (actin)                     |
| NM_013515    | STOM              | stomatin                                                           | cytoskeleton organisation (actin)                     |
| NM_178046    | SVIL              | supervillin                                                        | cytoskeleton organisation (actin)                     |
| NM_024427    | TPM1              | tropomyosin 1 (alpha)                                              | cytoskeleton organisation (actin)                     |
| NM_011876    | TWF2              | twinfilin, actin-binding protein, homolog 2 (Drosophila)           | cytoskeleton organisation (actin)                     |
| NM_009509    | VIL1              | villin 1                                                           | cytoskeleton organisation (actin)                     |
| NM_153423    | WASF2             | WAS protein family, member 2                                       | cytoskeleton organisation (actin)                     |
| NM_028459    | WASL (includes EC | Wiskott-Aldrich syndrome-like                                      | cytoskeleton organisation (actin)                     |
| NM_183017    | TTL12             | tubulin tyrosine ligase-like family, member 12                     | cytoskeleton organisation (microtubule nucleation)    |
| NM_001080971 | TUBB1             | tubulin, beta 1                                                    | cytoskeleton organisation (microtubule nucleation)    |
| NM_009450    | TUBB2A            | tubulin, beta 2A                                                   | cytoskeleton organisation (microtubule nucleation)    |
| NM_146116    | TUBB2C            | tubulin, beta 2C                                                   | cytoskeleton organisation (microtubule nucleation)    |
| NM_023279    | TUBB3             | tubulin, beta 3                                                    | cytoskeleton organisation (microtubule nucleation)    |
| NM_019756    | TUBD1             | tubulin, delta 1                                                   | cytoskeleton organisation (microtubule nucleation)    |
| NM_133755    | TUBGCP2           | tubulin, gamma complex associated protein 2                        | cytoskeleton organisation (microtubule nucleation)    |

|              |             |                                                                  |                                         |
|--------------|-------------|------------------------------------------------------------------|-----------------------------------------|
| NM_019641    | STMN1       | stathmin 1/oncoprotein 18                                        | cytoskeleton organisation (microtubule) |
| NM_021314    | TACC2       | transforming, acidic coiled-coil containing protein 2            | cytoskeleton organisation (microtubule) |
| NM_001040435 | TACC3       | transforming, acidic coiled-coil containing protein 3            | cytoskeleton organisation (microtubule) |
| NM_001048207 | GYPC        | glycophorin C (Gerbich blood group)                              | cytoskeleton stability                  |
| NM_001081373 | CEP164      | centrosomal protein 164kDa                                       | DNA repair                              |
| NM_015792    | FBXO18      | F-box protein, helicase, 18                                      | DNA repair                              |
| NM_010822    | MPG         | N-methylpurine-DNA glycosylase                                   | DNA repair                              |
| NM_010830    | MSH6        | mutS homolog 6 (E. coli)                                         | DNA repair                              |
| NM_001024917 | N4BP2       | NEDD4 binding protein 2                                          | DNA repair                              |
| NM_026330    | NSMCE1      | non-SMC element 1 homolog (S. cerevisiae)                        | DNA repair                              |
| NM_018878    | PAXIP1      | PAX interacting (with transcription-activation domain) protein 1 | DNA repair                              |
| NM_009010    | RAD23A      | RAD23 homolog A (S. cerevisiae)                                  | DNA repair                              |
| NM_009014    | RAD51L1     | RAD51-like 1 (S. cerevisiae)                                     | DNA repair                              |
| NM_130454    | RECQL5      | RecQ protein-like 5                                              | DNA repair                              |
| NM_177700    | ATMIN       | ATM interactor                                                   | DNA repair, cell cycle                  |
| NM_007550    | BLM         | Bloom syndrome                                                   | DNA repair, cell cycle                  |
| NM_026014    | CDT1        | chromatin licensing and DNA replication factor 1                 | DNA replication                         |
| NM_007999    | FEN1        | flap structure-specific endonuclease 1                           | DNA replication                         |
| NM_010210    | FHIT        | fragile histidine triad gene                                     | DNA replication                         |
| NM_178856    | GINS2       | GINS complex subunit 2 (Psf2 homolog)                            | DNA replication                         |
| NM_024240    | GINS4       | GINS complex subunit 4 (Sld5 homolog)                            | DNA replication                         |
| NM_008893    | POLA2       | polymerase (DNA directed), alpha 2 (70kD subunit)                | DNA replication                         |
| NM_008894    | POLD2       | polymerase (DNA directed), delta 2, regulatory subunit 50kDa     | DNA replication                         |
| NM_015810    | POLG2       | polymerase (DNA directed), gamma 2, accessory subunit            | DNA replication                         |
| NM_008922    | PRIM2       | primase, DNA, polypeptide 2 (58kDa)                              | DNA replication                         |
| NM_020022    | RFC2        | replication factor C (activator 1) 2, 40kDa                      | DNA replication                         |
| NM_025372    | TIPIN       | TIMELESS interacting protein                                     | DNA replication                         |
| NM_009387    | TK1         | thymidine kinase 1, soluble                                      | DNA replication                         |
| NM_145610    | PPAN-P2RY11 | PPAN-P2RY11 readthrough transcript                               | fusion protein                          |
| NM_013469    | ANXA11      | annexin A11                                                      | immune response                         |
| NM_009735    | B2M         | beta-2-microglobulin                                             | immune response                         |
| NM_019465    | CRTAM       | cytotoxic and regulatory T cell molecule                         | immune response                         |
| NM_007827    | DAF2        | decay accelerating factor 2                                      | immune response                         |
| NM_139220    | DEFB7       | defensin beta 7                                                  | immune response                         |
| NM_010391    | HLA-A       | major histocompatibility complex, class I, A                     | immune response                         |
| NM_008330    | IFI47       | interferon gamma inducible protein 47                            | immune response                         |
| NM_008326    | IRGM        | immunity-related GTPase family, M                                | immune response                         |



|              |                   |                                                                  |                   |
|--------------|-------------------|------------------------------------------------------------------|-------------------|
| NM_001025245 | MBP               | myelin basic protein                                             | immune response   |
| NM_029983    | SLA2 (includes EG | Src-like-adaptor 2                                               | immune response   |
| NM_001033405 | TREML2            | triggering receptor expressed on myeloid cells-like 2            | immune response   |
| NM_001033922 | TREML4            | triggering receptor expressed on myeloid cells-like 4            | immune response   |
| NM_030210    | AACS              | acetoacetyl-CoA synthetase                                       | metabolic process |
| NM_178772    | AADACL1           | arylacetamide deacetylase-like 1                                 | metabolic process |
| NM_177470    | ACAA2             | acetyl-Coenzyme A acyltransferase 2                              | metabolic process |
| NM_001033452 | ACCSL             | 1-aminocyclopropane-1-carboxylate synthase homolog (Arabidops    | metabolic process |
| NM_009599    | ACHE              | acetylcholinesterase (Yt blood group)                            | metabolic process |
| NM_001102405 | ACP5              | acid phosphatase 5, tartrate resistant                           | metabolic process |
| NM_027976    | ACSL5             | acyl-CoA synthetase long-chain family member 5                   | metabolic process |
| NM_080575    | ACSS1             | acyl-CoA synthetase short-chain family member 1                  | metabolic process |
| NM_019811    | ACSS2             | acyl-CoA synthetase short-chain family member 2                  | metabolic process |
| NM_001109756 | ADCY7             | adenylate cyclase 7                                              | metabolic process |
| NM_028320    | ADIPOR1           | adiponectin receptor 1                                           | metabolic process |
| NM_134079    | ADK               | adenosine kinase                                                 | metabolic process |
| NM_028121    | ADPGK             | ADP-dependent glucokinase                                        | metabolic process |
| NM_007421    | ADSSL1            | adenylosuccinate synthase like 1                                 | metabolic process |
| NM_026644    | AGPAT4            | 1-acylglycerol-3-phosphate O-acyltransferase 4 (lysophosphatidic | metabolic process |
| NM_028398    | AGXT2L2           | alanine-glyoxylate aminotransferase 2-like 2                     | metabolic process |
| NM_021299    | AK3               | adenylate kinase 3                                               | metabolic process |
| NM_001081277 | AK5               | adenylate kinase 5                                               | metabolic process |
| NM_001110208 | AKT2              | v-akt murine thymoma viral oncogene homolog 2                    | metabolic process |
| NM_153554    | ALDH18A1          | aldehyde dehydrogenase 18 family, member A1                      | metabolic process |
| NM_175438    | ALDH4A1           | aldehyde dehydrogenase 4 family, member A1                       | metabolic process |
| NM_019998    | ALG2              | asparagine-linked glycosylation 2, alpha-1,3-mannosyltransferase | metabolic process |
| NM_009663    | ALOX5AP           | arachidonate 5-lipoxygenase-activating protein                   | metabolic process |
| NM_007431    | ALPL              | alkaline phosphatase, liver/bone/kidney                          | metabolic process |
| NM_007444    | AMD1              | adenosylmethionine decarboxylase 1                               | metabolic process |
| NM_001081112 | ANKRD26           | ankyrin repeat domain 26                                         | metabolic process |
| NM_026674    | APH1C             | anterior pharynx defective 1c homolog (C. elegans)               | metabolic process |
| NM_028710    | ARSG              | arylsulfatase G                                                  | metabolic process |
| NM_020577    | AS3MT             | arsenic (+3 oxidation state) methyltransferase                   | metabolic process |
| NM_019734    | ASAH1             | N-acylsphingosine amidohydrolase (acid ceramidase) 1             | metabolic process |
| NM_018830    | ASAH2             | N-acylsphingosine amidohydrolase (non-lysosomal ceramidase) 2    | metabolic process |
| NM_012055    | ASNS              | asparagine synthetase                                            | metabolic process |
| NM_007512    | ATPIF1            | ATPase inhibitory factor 1                                       | metabolic process |

|              |                   |                                                                     |                   |
|--------------|-------------------|---------------------------------------------------------------------|-------------------|
| NM_016709    | AUH               | AU RNA binding protein/enoyl-Coenzyme A hydratase                   | metabolic process |
| NM_001102458 | AZIN1             | antizyme inhibitor 1                                                | metabolic process |
| NM_027739    | B4GALNT1          | beta-1,4-N-acetyl-galactosaminyl transferase 1                      | metabolic process |
| NM_177897    | B4GALNT4          | beta-1,4-N-acetyl-galactosaminyl transferase 4                      | metabolic process |
| NM_022305    | B4GALT1           | UDP-Gal:betaGlcNAc beta 1,4- galactosyltransferase, polypeptide     | metabolic process |
| NM_019835    | B4GALT5           | UDP-Gal:betaGlcNAc beta 1,4- galactosyltransferase, polypeptide     | metabolic process |
| NM_007519    | BAAT              | bile acid Coenzyme A: amino acid N-acyltransferase (glycine N-ch    | metabolic process |
| NM_007563    | BPGM              | 2,3-bisphosphoglycerate mutase                                      | metabolic process |
| NM_052993    | C1GALT1           | core 1 synthase, glycoprotein-N-acetylgalactosamine 3-beta-galac    | metabolic process |
| NM_009801    | CA2               | carbonic anhydrase II                                               | metabolic process |
| NM_009804    | CAT               | catalase                                                            | metabolic process |
| NM_138651    | CDS2              | CDP-diacylglycerol synthase (phosphatidate cytidyltransferase) 2    | metabolic process |
| NM_023850    | CHST1             | carbohydrate (keratan sulfate Gal-6) sulfotransferase 1             | metabolic process |
| NM_021439    | CHST11            | carbohydrate (chondroitin 4) sulfotransferase 11                    | metabolic process |
| NM_028117    | CHST14            | carbohydrate (N-acetylgalactosamine 4-O) sulfotransferase 14        | metabolic process |
| NM_001081163 | CHSY1             | chondroitin sulfate synthase 1                                      | metabolic process |
| NM_009908    | CMAS              | cytidine monophosphate N-acetylneuraminic acid synthetase           | metabolic process |
| NM_020557    | CMPK2             | cytidine monophosphate (UMP-CMP) kinase 2, mitochondrial            | metabolic process |
| NM_009937    | COLQ              | collagen-like tail subunit (single strand of homotrimer) of asymmet | metabolic process |
| NM_001111062 | COMT              | catechol-O-methyltransferase                                        | metabolic process |
| NM_026965    | COMTD1            | catechol-O-methyltransferase domain containing 1                    | metabolic process |
| NM_145507    | DARS              | aspartyl-tRNA synthetase                                            | metabolic process |
| NM_033623    | DCUN1D1           | DCN1, defective in cullin neddylation 1, domain containing 1 (S. ce | metabolic process |
| NM_016765    | DDAH2             | dimethylarginine dimethylaminohydrolase 2                           | metabolic process |
| NM_016672    | DDC               | dopa decarboxylase (aromatic L-amino acid decarboxylase)            | metabolic process |
| NM_001039106 | DDHD1             | DDHD domain containing 1                                            | metabolic process |
| NM_024208    | ECHDC3            | enoyl Coenzyme A hydratase domain containing 3                      | metabolic process |
| NM_028013    | ENDOD1            | endonuclease domain containing 1                                    | metabolic process |
| NM_026174    | ENTPD4            | ectonucleoside triphosphate diphosphohydrolase 4                    | metabolic process |
| NM_010146    | EPM2A (includes E | epilepsy, progressive myoclonus type 2A, Lafora disease (laforin)   | metabolic process |
| NM_029735    | EPRS              | glutamyl-prolyl-tRNA synthetase                                     | metabolic process |
| NM_010162    | EXT1              | exostoses (multiple) 1                                              | metabolic process |
| NM_018788    | EXTL3             | exostoses (multiple)-like 3                                         | metabolic process |
| NM_023480    | FAHD1             | fumarylacetoacetate hydrolase domain containing 1                   | metabolic process |
| NM_173423    | FEM1C             | fem-1 homolog c (C. elegans)                                        | metabolic process |
| NM_021891    | FIGNL1            | fidgetin-like 1                                                     | metabolic process |
| NM_025799    | FUCA2             | fucosidase, alpha-L- 2, plasma                                      | metabolic process |

|              |                     |                                                                               |                   |
|--------------|---------------------|-------------------------------------------------------------------------------|-------------------|
| NM_001081454 | FURIN               | furin (paired basic amino acid cleaving enzyme)                               | metabolic process |
| NM_001136484 | GCNT1               | glucosaminyl (N-acetyl) transferase 1, core 2 (beta-1,6-N-acetylglucosaminyl) | metabolic process |
| NM_010266    | GDA                 | guanine deaminase                                                             | metabolic process |
| NM_013528    | GFPT1               | glutamine-fructose-6-phosphate transaminase 1                                 | metabolic process |
| NM_010283    | GGTA1               | glycoprotein, alpha-galactosyltransferase 1                                   | metabolic process |
| NM_008131    | GLUL                | glutamate-ammonia ligase (glutamine synthetase)                               | metabolic process |
| NM_001031667 | GSK3A               | glycogen synthase kinase 3 alpha                                              | metabolic process |
| NM_025325    | HAAO                | 3-hydroxyanthranilate 3,4-dioxygenase                                         | metabolic process |
| NM_024284    | HAGH                | hydroxyacylglutathione hydrolase                                              | metabolic process |
| NM_139145    | HLCS                | holocarboxylase synthetase (biotin-(propionyl-Coenzyme A-carboxyltransferase) | metabolic process |
| NM_178870    | HS3ST3A1            | heparan sulfate (glucosamine) 3-O-sulfotransferase 3A1                        | metabolic process |
| NM_015818    | HS6ST1              | heparan sulfate 6-O-sulfotransferase 1                                        | metabolic process |
| NM_010489    | HYAL2               | hyaluronoglucosaminidase 2                                                    | metabolic process |
| NM_177197    | ID12 (includes EG:3 | isopentenyl-diphosphate delta isomerase 2                                     | metabolic process |
| NM_173027    | IHPK3               | inositol hexakisphosphate kinase 3                                            | metabolic process |
| NM_153526    | INSIG1              | insulin induced gene 1                                                        | metabolic process |
| NM_001101598 | ISOC2               | isochorismatase domain containing 2                                           | metabolic process |
| NM_133892    | LAO1                | L-amino acid oxidase 1                                                        | metabolic process |
| NM_153408    | LINCR               | likely ortholog of mouse lung-inducible Neutralized-related C3HC4             | metabolic process |
| NM_008280    | LIPC                | lipase, hepatic                                                               | metabolic process |
| NM_145376    | LPCAT1              | lysophosphatidylcholine acyltransferase 1                                     | metabolic process |
| NM_022882    | LPIN2               | lipin 2                                                                       | metabolic process |
| NM_008509    | LPL                 | lipoprotein lipase                                                            | metabolic process |
| NM_146006    | LSS                 | lanosterol synthase (2,3-oxidosqualene-lanosterol cyclase)                    | metabolic process |
| NM_008548    | MAN1A1              | mannosidase, alpha, class 1A, member 1                                        | metabolic process |
| NM_026968    | MANBAL              | mannosidase, beta A, lysosomal-like                                           | metabolic process |
| NM_145569    | MAT2A               | methionine adenosyltransferase II, alpha                                      | metabolic process |
| NM_134017    | MAT2B               | methionine adenosyltransferase II, beta                                       | metabolic process |
| NM_001083341 | MBOAT2              | membrane bound O-acyltransferase domain containing 2                          | metabolic process |
| NM_145494    | ME2                 | malic enzyme 2, NAD(+)-dependent, mitochondrial                               | metabolic process |
| NM_145926    | MGAT4B              | mannosyl (alpha-1,3-)-glycoprotein beta-1,4-N-acetylglucosaminyl              | metabolic process |
| NM_011844    | MGLL                | monoglyceride lipase                                                          | metabolic process |
| NM_174995    | MGST2               | microsomal glutathione S-transferase 2                                        | metabolic process |
| NM_025569    | MGST3               | microsomal glutathione S-transferase 3                                        | metabolic process |
| NM_153396    | MICAL3 (includes E  | microtubule associated monooxygenase, calponin and LIM domain                 | metabolic process |
| NM_010799    | MINPP1              | multiple inositol polyphosphate histidine phosphatase, 1                      | metabolic process |
| NM_175403    | MLEC                | malectin                                                                      | metabolic process |

|              |                   |                                                             |                   |
|--------------|-------------------|-------------------------------------------------------------|-------------------|
| NM_028464    | MOCS1             | molybdenum cofactor synthesis 1                             | metabolic process |
| NM_024433    | MTAP (includes EC | methythioadenosine phosphorylase                            | metabolic process |
| NM_013792    | NAGLU             | N-acetylglucosaminidase, alpha-                             | metabolic process |
| NM_145829    | NAGS              | N-acetylglutamate synthase                                  | metabolic process |
| NM_026086    | NANP              | N-acetylneuraminic acid phosphatase                         | metabolic process |
| NM_178728    | NAPEPLD           | N-acyl phosphatidylethanolamine phospholipase D             | metabolic process |
| NM_026272    | NARF              | nuclear prelamin A recognition factor                       | metabolic process |
| NM_153126    | NAT10             | N-acetyltransferase 10 (GCN5-related)                       | metabolic process |
| NM_008674    | NAT3              | N-acetyltransferase 3                                       | metabolic process |
| NM_010811    | NDST2             | N-deacetylase/N-sulfotransferase (heparan glucosaminyl) 2   | metabolic process |
| NM_019730    | NME3              | non-metastatic cells 3, protein expressed in                | metabolic process |
| NM_144533    | NMNAT3 (includes  | nicotinamide nucleotide adenyltransferase 3                 | metabolic process |
| NM_010924    | NNMT              | nicotinamide N-methyltransferase                            | metabolic process |
| NM_008710    | NNT               | nicotinamide nucleotide transhydrogenase                    | metabolic process |
| NM_172204    | NOXA1             | NADPH oxidase activator 1                                   | metabolic process |
| NM_172204    | NOXA1             | NADPH oxidase activator 1                                   | metabolic process |
| NM_025539    | NUDT2             | nudix (nucleoside diphosphate linked moiety X)-type motif 2 | metabolic process |
| NM_001013022 | ODF3B             | outer dense fiber of sperm tails 3B                         | metabolic process |
| NM_173777    | OLFM2             | olfactomedin 2                                              | metabolic process |
| NM_025661    | ORMDL3            | ORM1-like 3 (S. cerevisiae)                                 | metabolic process |
| NM_138604    | OTUD5             | OTU domain containing 5                                     | metabolic process |
| NM_008797    | PC                | pyruvate carboxylase                                        | metabolic process |
| NM_011044    | PCK1              | phosphoenolpyruvate carboxykinase 1 (soluble)               | metabolic process |
| NM_153565    | PCSK9             | proprotein convertase subtilisin/kexin type 9               | metabolic process |
| NM_146239    | PCTK2             | PCTAIRE protein kinase 2                                    | metabolic process |
| NM_211138    | PCYT1B            | phosphate cytidyltransferase 1, choline, beta               | metabolic process |
| NM_021453    | PGA5              | pepsinogen 5, group I (pepsinogen A)                        | metabolic process |
| NM_025396    | PGLS              | 6-phosphogluconolactonase                                   | metabolic process |
| NM_027629    | PGM2L1            | phosphoglucomutase 2-like 1                                 | metabolic process |
| NM_175306    | PHACTR4           | phosphatase and actin regulator 4                           | metabolic process |
| NM_025408    | PHCA              | alkaline ceramidase 3                                       | metabolic process |
| NM_008845    | PIP4K2A           | phosphatidylinositol-5-phosphate 4-kinase, type II, alpha   | metabolic process |
| NM_054097    | PIP4K2C           | phosphatidylinositol-5-phosphate 4-kinase, type II, gamma   | metabolic process |
| NM_008846    | PIP5K1B           | phosphatidylinositol-4-phosphate 5-kinase, type I, beta     | metabolic process |
| NM_177298    | PISD              | phosphatidylserine decarboxylase                            | metabolic process |
| NM_016915    | PLA2G6            | phospholipase A2, group VI (cytosolic, calcium-independent) | metabolic process |
| NM_023564    | PLSCR3            | phospholipid scramblase 3                                   | metabolic process |

|              |            |                                                                                           |                   |
|--------------|------------|-------------------------------------------------------------------------------------------|-------------------|
| NM_001034885 | PNPLA1     | patatin-like phospholipase domain containing 1                                            | metabolic process |
| NM_015801    | PNPLA6     | patatin-like phospholipase domain containing 6                                            | metabolic process |
| NM_030262    | POFUT2     | protein O-fucosyltransferase 2                                                            | metabolic process |
| NM_026438    | PPA1       | pyrophosphatase (inorganic) 1                                                             | metabolic process |
| NM_146141    | PPA2       | pyrophosphatase (inorganic) 2                                                             | metabolic process |
| NM_176831    | PPCDC      | phosphopantothencysteine decarboxylase                                                    | metabolic process |
| NM_001098231 | PPM2C      | protein phosphatase 2C, magnesium-dependent, catalytic subunit                            | metabolic process |
| NM_001013367 | PRKAA1     | protein kinase, AMP-activated, alpha 1 catalytic subunit                                  | metabolic process |
| NM_031869    | PRKAB1     | protein kinase, AMP-activated, beta 1 non-catalytic subunit                               | metabolic process |
| NM_080554    | PSMD5      | proteasome (prosome, macropain) 26S subunit, non-ATPase, 5                                | metabolic process |
| NM_011192    | PSME3      | proteasome (prosome, macropain) activator subunit 3 (PA28 gamma)                          | metabolic process |
| NM_013782    | PTDSS2     | phosphatidylserine synthase 2                                                             | metabolic process |
| NM_009075    | RPIA       | ribose 5-phosphate isomerase A                                                            | metabolic process |
| NM_133933    | RPN1       | ribophorin I                                                                              | metabolic process |
| NM_019642    | RPN2       | ribophorin II                                                                             | metabolic process |
| NM_145565    | SDS        | serine dehydratase                                                                        | metabolic process |
| NM_133902    | SDSL       | serine dehydratase-like                                                                   | metabolic process |
| NM_144792    | SGMS1      | sphingomyelin synthase 1                                                                  | metabolic process |
| NM_029945    | SMPD4      | sphingomyelin phosphodiesterase 4, neutral membrane (neutral sphingomyelinase 4)          | metabolic process |
| NM_029367    | SPACA3     | sperm acrosome associated 3                                                               | metabolic process |
| NM_009272    | SRM        | spermidine synthase                                                                       | metabolic process |
| NM_009177    | ST3GAL1    | ST3 beta-galactoside alpha-2,3-sialyltransferase 1                                        | metabolic process |
| NM_009179    | ST3GAL2    | ST3 beta-galactoside alpha-2,3-sialyltransferase 2                                        | metabolic process |
| NM_009178    | ST3GAL4    | ST3 beta-galactoside alpha-2,3-sialyltransferase 4                                        | metabolic process |
| NM_001035228 | ST3GAL5    | ST3 beta-galactoside alpha-2,3-sialyltransferase 5                                        | metabolic process |
| NM_018784    | ST3GAL6    | ST3 beta-galactoside alpha-2,3-sialyltransferase 6                                        | metabolic process |
| NM_011372    | ST6GALNAC3 | ST6 (alpha-N-acetyl-neuraminyl-2,3-beta-galactosyl-1,3)-N-acetylglucosaminyltransferase 3 | metabolic process |
| NM_012028    | ST6GALNAC5 | ST6 (alpha-N-acetyl-neuraminyl-2,3-beta-galactosyl-1,3)-N-acetylglucosaminyltransferase 5 | metabolic process |
| NM_001113352 | SYNJ2      | synaptojanin 2                                                                            | metabolic process |
| NM_011528    | TALDO1     | transaldolase 1                                                                           | metabolic process |
| NM_009373    | TGM2       | transglutaminase 2 (C polypeptide, protein-glutamine-gamma-glutamyl cross-linking factor) | metabolic process |
| NM_001040426 | THSD4      | thrombospondin, type I, domain containing 4                                               | metabolic process |
| NM_176842    | TPRKB      | TP53RK binding protein                                                                    | metabolic process |
| NM_030254    | TUSC3      | tumor suppressor candidate 3                                                              | metabolic process |
| NM_030724    | UCK2       | uridine-cytidine kinase 2                                                                 | metabolic process |
| NM_026765    | UCKL1      | uridine-cytidine kinase 1-like 1                                                          | metabolic process |
| NM_011673    | UGCG       | UDP-glucose ceramide glucosyltransferase                                                  | metabolic process |

|              |                    |                                                                                    |                   |
|--------------|--------------------|------------------------------------------------------------------------------------|-------------------|
| NM_201645    | UGT1A1             | UDP glucuronosyltransferase 1 family, polypeptide A1                               | metabolic process |
| NM_009471    | UMPS               | uridine monophosphate synthetase                                                   | metabolic process |
| NM_009477    | UPP1               | uridine phosphorylase 1                                                            | metabolic process |
| NM_145218    | WBSCR17            | Williams-Beuren syndrome chromosome region 17                                      | metabolic process |
| NM_009667    | AMPD3              | adenosine monophosphate deaminase (isoform E)                                      | metabolic process |
| NM_026639    | ART4               | ADP-ribosyltransferase 4 (Dombrock blood group)                                    | metabolic process |
| NM_016888    | B3GNT2             | UDP-GlcNAc:betaGal beta-1,3-N-acetylglucosaminyltransferase 2                      | metabolic process |
| NM_145222    | B3GNT7             | UDP-GlcNAc:betaGal beta-1,3-N-acetylglucosaminyltransferase 7                      | metabolic process |
| NM_172148    | B9D2               | B9 protein domain 2                                                                | metabolic process |
| NM_134189    | GALNT10            | UDP-N-acetyl-alpha-D-galactosamine:polypeptide N-acetylglactosaminyltransferase 10 | metabolic process |
| NM_139272    | GALNT2             | UDP-N-acetyl-alpha-D-galactosamine:polypeptide N-acetylglactosaminyltransferase 2  | metabolic process |
| NM_172451    | GALNT6             | UDP-N-acetyl-alpha-D-galactosamine:polypeptide N-acetylglactosaminyltransferase 6  | metabolic process |
| NM_010360    | GSTM3 (includes E) | glutathione S-transferase mu 3 (brain)                                             | metabolic process |
| NM_027126    | HFE2               | hemochromatosis type 2 (juvenile)                                                  | metabolic process |
| NM_010438    | HK1                | hexokinase 1                                                                       | metabolic process |
| NM_013820    | HK2                | hexokinase 2                                                                       | metabolic process |
| NM_001113527 | ISG20              | interferon stimulated exonuclease gene 20kDa                                       | metabolic process |
| NM_010700    | LDLR               | low density lipoprotein receptor                                                   | metabolic process |
| NM_145554    | LDLRAP1            | low density lipoprotein receptor adaptor protein 1                                 | metabolic process |
| NM_029409    | MFF                | mitochondrial fission factor                                                       | metabolic process |
| NM_008613    | MNS1               | meiosis-specific nuclear structural 1                                              | metabolic process |
| NM_172958    | MTMR12             | myotubularin related protein 12                                                    | metabolic process |
| NM_028860    | MTMR3              | myotubularin related protein 3                                                     | metabolic process |
| NM_029810    | NT5C2              | 5'-nucleotidase, cytosolic II                                                      | metabolic process |
| NM_026004    | NT5C3              | 5'-nucleotidase, cytosolic III                                                     | metabolic process |
| NM_175331    | NT5DC3             | 5'-nucleotidase domain containing 3                                                | metabolic process |
| NM_011956    | NUBP2              | nucleotide binding protein 2 (MinD homolog, E. coli)                               | metabolic process |
| NM_016773    | NUCB2              | nucleobindin 2                                                                     | metabolic process |
| NM_033080    | NUDT19             | nudix (nucleoside diphosphate linked moiety X)-type motif 19                       | metabolic process |
| NM_026171    | NVL                | nuclear VCP-like                                                                   | metabolic process |
| NM_016978    | OAT                | ornithine aminotransferase (gyrate atrophy)                                        | metabolic process |
| NM_028696    | OBFC2A             | oligonucleotide/oligosaccharide-binding fold containing 2A                         | metabolic process |
| NM_013614    | ODC1               | ornithine decarboxylase 1                                                          | metabolic process |
| NM_001038614 | OLFM1              | olfactomedin 1                                                                     | metabolic process |
| NM_177068    | OLFML2B            | olfactomedin-like 2B                                                               | metabolic process |
| NM_054076    | OPTC               | opticin                                                                            | metabolic process |
| NM_153129    | PACS1              | phosphofurin acidic cluster sorting protein 1                                      | metabolic process |

|              |                    |                                                            |                                 |
|--------------|--------------------|------------------------------------------------------------|---------------------------------|
| NM_011059    | PADI1              | peptidyl arginine deiminase, type I                        | metabolic process               |
| NM_023792    | PANK1              | pantothenate kinase 1                                      | metabolic process               |
| NM_172990    | PANK4              | pantothenate kinase 4                                      | metabolic process               |
| NM_021568    | PCBP3              | poly(rC) binding protein 3                                 | metabolic process               |
| NM_025835    | PCCB               | propionyl Coenzyme A carboxylase, beta polypeptide         | metabolic process               |
| NM_001081070 | PDIA2              | protein disulfide isomerase family A, member 2             | metabolic process               |
| NM_146156    | PDIK1L             | PDLIM1 interacting kinase 1 like                           | metabolic process               |
| NM_019703    | PFKP               | phosphofructokinase, platelet                              | metabolic process               |
| NM_031190    | PGK2               | phosphoglycerate kinase 2                                  | metabolic process               |
| NM_146194    | PICALM             | phosphatidylinositol binding clathrin assembly protein     | metabolic process               |
| NM_001039045 | PIGC               | phosphatidylinositol glycan anchor biosynthesis, class C   | metabolic process               |
| NM_001039536 | PIGL               | phosphatidylinositol glycan anchor biosynthesis, class L   | metabolic process               |
| NM_011822    | PIGQ               | phosphatidylinositol glycan anchor biosynthesis, class Q   | metabolic process               |
| NM_178698    | PIGV               | phosphatidylinositol glycan anchor biosynthesis, class V   | metabolic process               |
| NM_013631    | PKLR               | pyruvate kinase, liver and RBC                             | metabolic process               |
| NM_011987    | PLA2G10            | phospholipase A2, group X                                  | metabolic process               |
| NM_008907    | PPIA (includes EG) | peptidylprolyl isomerase A                                 | metabolic process               |
| NM_026352    | PPID               | peptidylprolyl isomerase D                                 | metabolic process               |
| NM_134084    | PPIF               | peptidylprolyl isomerase F                                 | metabolic process               |
| NM_011101    | PRKCA              | protein kinase C, alpha                                    | metabolic process               |
| NM_019537    | PSMG1              | proteasome (prosome, macropain) assembly chaperone 1       | metabolic process               |
| NM_019519    | RABGGTA            | Rab geranylgeranyltransferase, alpha subunit               | metabolic process               |
| NM_023663    | RIPK4              | receptor-interacting serine-threonine kinase 4             | metabolic process               |
| NM_011882    | RNASEL             | ribonuclease L (2',5'-oligoadenylate synthetase-dependent) | metabolic process               |
| NM_013876    | RNF11              | ring finger protein 11                                     | metabolic process               |
| NM_011421    | SMPD1              | sphingomyelin phosphodiesterase 1, acid lysosomal          | metabolic process               |
| NM_001033463 | TATDN2             | TatD DNase domain containing 2                             | metabolic process               |
| NM_207228    | TSGA10             | testis specific, 10                                        | metabolic process               |
| NM_011656    | TUFT1              | tuftelin 1                                                 | metabolic process               |
| NM_027130    | AFG3L2             | AFG3 ATPase family gene 3-like 2 (yeast)                   | metabolic process (proteolysis) |
| NM_146226    | APEH               | N-acylaminoacyl-peptide hydrolase                          | metabolic process (proteolysis) |
| NM_026414    | ASPRV1             | aspartic peptidase, retroviral-like 1                      | metabolic process (proteolysis) |
| NM_025583    | CTRB2              | chymotrypsinogen B2                                        | metabolic process (proteolysis) |
| NM_019861    | CTSF               | cathepsin F                                                | metabolic process (proteolysis) |
| NM_033612    | ELA1               | elastase 1, pancreatic                                     | metabolic process (proteolysis) |
| NM_026419    | ELA3B              | elastase 3B, pancreatic                                    | metabolic process (proteolysis) |
| NM_019447    | HGFAC              | HGF activator                                              | metabolic process (proteolysis) |

|              |                   |                                                       |                                           |
|--------------|-------------------|-------------------------------------------------------|-------------------------------------------|
| NM_011175    | LGMN              | legumain                                              | metabolic process (proteolysis)           |
| NM_013783    | MMEL1             | membrane metallo-endopeptidase-like 1                 | metabolic process (proteolysis)           |
| NM_008942    | NPEPPS            | aminopeptidase puromycin sensitive                    | metabolic process (proteolysis)           |
| NM_020610    | NRIP3             | nuclear receptor interacting protein 3                | metabolic process (proteolysis)           |
| NM_145131    | PITRM1            | pitrilysin metallopeptidase 1                         | metabolic process (proteolysis)           |
| NM_028243    | PRCP              | prolylcarboxypeptidase (angiotensinase C)             | metabolic process (proteolysis)           |
| NM_011156    | PREP              | prolyl endopeptidase                                  | metabolic process (proteolysis)           |
| NM_026111    | QPCTL             | glutaminy-peptide cyclotransferase-like               | metabolic process (proteolysis)           |
| NM_001003972 | SENP7             | SUMO1/sentrin specific peptidase 7                    | metabolic process (proteolysis)           |
| NM_015830    | SOLH              | small optic lobes homolog (Drosophila)                | metabolic process (proteolysis)           |
| NM_009418    | TPP2              | tripeptidyl peptidase II                              | metabolic process (proteolysis)           |
| NM_029012    | UNQ1887           | signal peptide peptidase 3                            | metabolic process (proteolysis)           |
| NM_133216    | XPNPEP1           | X-prolyl aminopeptidase (aminopeptidase P) 1, soluble | metabolic process (proteolysis)           |
| NM_153583    | ATG4D             | ATG4 autophagy related 4 homolog D (S. cerevisiae)    | metabolic process (proteolysis)           |
| NM_028835    | ATG7              | ATG7 autophagy related 7 homolog (S. cerevisiae)      | metabolic process (proteolysis)           |
| NM_027749    | CPVL              | carboxypeptidase, vitellogenic-like                   | metabolic process (proteolysis)           |
| NM_007798    | CTSB              | cathepsin B                                           | metabolic process (proteolysis)           |
| NM_032540    | KEL               | Kell blood group, metallo-endopeptidase               | metabolic process (proteolysis)           |
| NM_008525    | ALAD              | aminolevulinate, delta-, dehydratase                  | metabolic process, heme catabolic process |
| NM_009653    | ALAS2             | aminolevulinate, delta-, synthase 2                   | metabolic process, heme catabolic process |
| NM_026678    | BLVRA             | biliverdin reductase A                                | metabolic process, heme catabolic process |
| NM_007757    | CPOX              | coproporphyrinogen oxidase                            | metabolic process, heme catabolic process |
| NM_007998    | FECH              | ferrochelataase (protoporphyria)                      | metabolic process, heme catabolic process |
| NM_013551    | HMBS              | hydroxymethylbilane synthase                          | metabolic process, heme catabolic process |
| NM_008911    | PPOX              | protoporphyrinogen oxidase                            | metabolic process, heme catabolic process |
| NM_009478    | UROD              | uroporphyrinogen decarboxylase                        | metabolic process, heme catabolic process |
| NM_009479    | UROS              | uroporphyrinogen III synthase                         | metabolic process, heme catabolic process |
| NM_009616    | ADAM19            | ADAM metallopeptidase domain 19 (meltrin beta)        | metabolic process, proteolysis            |
| NM_007601    | CAPN3             | calpain 3, (p94)                                      | metabolic process, proteolysis            |
| NM_007602    | CAPN5             | calpain 5                                             | metabolic process, proteolysis            |
| NR_003523    | H2AFY3            | H2A histone family, member Y3                         | Nucleosome assembly                       |
| NM_008210    | H3F3A (includes E | H3 histone, family 3A                                 | Nucleosome assembly                       |
| NM_008211    | H3F3B             | H3 histone, family 3B (H3.3B)                         | Nucleosome assembly                       |
| NM_030609    | HIST1H1A          | histone cluster 1, H1a                                | Nucleosome assembly                       |
| NM_015786    | HIST1H1C          | histone cluster 1, H1c                                | Nucleosome assembly                       |
| NM_175659    | HIST1H2AC         | histone cluster 1, H2ac                               | Nucleosome assembly                       |
| NM_178183    | HIST1H2AD         | histone cluster 1, H2ad                               | Nucleosome assembly                       |



|           |                   |                          |                     |
|-----------|-------------------|--------------------------|---------------------|
| NM_178185 | HIST1H2AE (includ | histone cluster 1, H2ae  | Nucleosome assembly |
| NM_175660 | HIST1H2AE (includ | histone cluster 1, H2ae  | Nucleosome assembly |
| NM_178187 | HIST1H2AE (includ | histone cluster 1, H2ae  | Nucleosome assembly |
| NM_178186 | HIST1H2AE (includ | histone cluster 1, H2ae  | Nucleosome assembly |
| NM_178188 | HIST1H2AE (includ | histone cluster 1, H2ae  | Nucleosome assembly |
| NM_178182 | HIST1H2AE (includ | histone cluster 1, H2ae  | Nucleosome assembly |
| NM_178184 | HIST1H2AE (includ | histone cluster 1, H2ae  | Nucleosome assembly |
| NM_175661 | HIST1H2AF         | histone cluster 1, H2af  | Nucleosome assembly |
| NM_178202 | HIST1H2BD         | histone cluster 1, H2bd  | Nucleosome assembly |
| NM_178196 | HIST1H2BI         | histone cluster 1, H2bi  | Nucleosome assembly |
| NM_023422 | HIST1H2BI         | histone cluster 1, H2bi  | Nucleosome assembly |
| NM_178194 | HIST1H2BI         | histone cluster 1, H2bi  | Nucleosome assembly |
| NM_178199 | HIST1H2BK         | histone cluster 1, H2bk  | Nucleosome assembly |
| NM_178198 | HIST1H2BK         | histone cluster 1, H2bk  | Nucleosome assembly |
| NM_178195 | HIST1H2BK         | histone cluster 1, H2bk  | Nucleosome assembly |
| NM_175665 | HIST1H2BK         | histone cluster 1, H2bk  | Nucleosome assembly |
| NM_178201 | HIST1H2BK         | histone cluster 1, H2bk  | Nucleosome assembly |
| NM_178200 | HIST1H2BM         | histone cluster 1, H2bm  | Nucleosome assembly |
| NM_175664 | HIST1H2BN         | histone cluster 1, H2bn  | Nucleosome assembly |
| NM_178203 | HIST1H3F          | histone cluster 1, H3f   | Nucleosome assembly |
| NM_175653 | HIST1H3F          | histone cluster 1, H3f   | Nucleosome assembly |
| NM_178204 | HIST1H3F          | histone cluster 1, H3f   | Nucleosome assembly |
| NM_178205 | HIST1H3F          | histone cluster 1, H3f   | Nucleosome assembly |
| NM_013548 | HIST1H3F          | histone cluster 1, H3f   | Nucleosome assembly |
| NM_175656 | HIST1H4A          | histone cluster 1, H4a   | Nucleosome assembly |
| NM_178208 | HIST1H4C          | histone cluster 1, H4c   | Nucleosome assembly |
| NM_175657 | HIST1H4D          | histone cluster 1, H4d   | Nucleosome assembly |
| NM_033596 | HIST1H4E          | histone cluster 1, H4e   | Nucleosome assembly |
| NM_178192 | HIST1H4F          | histone cluster 1, H4f   | Nucleosome assembly |
| NM_153173 | HIST1H4H (include | histone cluster 1, H4h   | Nucleosome assembly |
| NM_175654 | HIST1H4L          | histone cluster 1, H4l   | Nucleosome assembly |
| NM_178212 | HIST2H2AA2        | histone cluster 2, H2aa2 | Nucleosome assembly |
| NM_054045 | HIST2H3C2         | histone cluster 2, H3c2  | Nucleosome assembly |
| NM_178216 | HIST2H3D          | histone cluster 2, H3d   | Nucleosome assembly |
| NM_013550 | HIST3H3 (includes | histone cluster 3, H3    | Nucleosome assembly |
| NM_178206 | HIST3H3 (includes | histone cluster 3, H3    | Nucleosome assembly |
| NM_178207 | HIST3H3 (includes | histone cluster 3, H3    | Nucleosome assembly |

|              |                   |                                                                |                     |
|--------------|-------------------|----------------------------------------------------------------|---------------------|
| NM_145073    | HIST3H3 (includes | histone cluster 3, H3                                          | Nucleosome assembly |
| NM_178211    | HIST4H4 (includes | histone cluster 4, H4                                          | Nucleosome assembly |
| NM_010470    | HP1BP3            | heterochromatin protein 1, binding protein 3                   | Nucleosome assembly |
| NM_008672    | NAP1L4            | nucleosome assembly protein 1-like 4                           | Nucleosome assembly |
| NM_009407    | TNP1              | transition protein 1 (during histone to protamine replacement) | Nucleosome assembly |
| NM_198617    | TSPYL3            | TSPY-like 3 (pseudogene)                                       | Nucleosome assembly |
| NM_199195    | BCKDHB            | branched chain keto acid dehydrogenase E1, beta polypeptide    | oxidation reduction |
| NM_001122683 | BDH1              | 3-hydroxybutyrate dehydrogenase, type 1                        | oxidation reduction |
| NM_144923    | BLVRB             | biliverdin reductase B (flavin reductase (NADPH))              | oxidation reduction |
| NM_027978    | COQ2              | coenzyme Q2 homolog, prenyltransferase (yeast)                 | oxidation reduction |
| NM_053091    | COX4I2            | cytochrome c oxidase subunit IV isoform 2 (lung)               | oxidation reduction |
| NM_007751    | COX8B             | cytochrome c oxidase, subunit VIIIb                            | oxidation reduction |
| NM_013495    | CPT1A             | carnitine palmitoyltransferase 1A (liver)                      | oxidation reduction |
| NM_029787    | CYB5R3            | cytochrome b5 reductase 3                                      | oxidation reduction |
| NM_175475    | CYP26B1           | cytochrome P450, family 26, subfamily B, polypeptide 1         | oxidation reduction |
| NM_001105201 | CYP26C1           | cytochrome P450, family 26, subfamily C, polypeptide 1         | oxidation reduction |
| NM_009999    | CYP2B6 (includes  | cytochrome P450, family 2, subfamily B, polypeptide 6          | oxidation reduction |
| NM_029562    | CYP2D26           | cytochrome P450, family 2, subfamily d, polypeptide 26         | oxidation reduction |
| NM_001100181 | CYP4A11           | cytochrome P450, family 4, subfamily A, polypeptide 11         | oxidation reduction |
| NM_011303    | DHRS3             | dehydrogenase/reductase (SDR family) member 3                  | oxidation reduction |
| NM_001037938 | DHRS4             | dehydrogenase/reductase (SDR family) member 4                  | oxidation reduction |
| NM_133964    | DOHH              | deoxyhypusine hydroxylase/monooxygenase                        | oxidation reduction |
| NM_144858    | DUS3L             | dihydrouridine synthase 3-like (S. cerevisiae)                 | oxidation reduction |
| NM_053207    | EGLN1             | egl nine homolog 1 (C. elegans)                                | oxidation reduction |
| NM_028133    | EGLN3             | egl nine homolog 3 (C. elegans)                                | oxidation reduction |
| NM_023737    | EHHADH            | enoyl-Coenzyme A, hydratase/3-hydroxyacyl Coenzyme A dehydr    | oxidation reduction |
| NM_010191    | FDFT1             | farnesyl-diphosphate farnesyltransferase 1                     | oxidation reduction |
| NM_010239    | FTH1              | ferritin, heavy polypeptide 1                                  | oxidation reduction |
| NM_031261    | FTHL17            | ferritin, heavy polypeptide-like 17                            | oxidation reduction |
| NM_008084    | GAPDH (includes B | glyceraldehyde-3-phosphate dehydrogenase                       | oxidation reduction |
| NM_008129    | GCLM              | glutamate-cysteine ligase, modifier subunit                    | oxidation reduction |
| NM_001033399 | GFOD1             | glucose-fructose oxidoreductase domain containing 1            | oxidation reduction |
| NM_053108    | GLRX              | glutaredoxin (thioltransferase)                                | oxidation reduction |
| NM_028419    | GLRX5             | glutaredoxin 5                                                 | oxidation reduction |
| NM_025508    | GMPR              | guanosine monophosphate reductase                              | oxidation reduction |
| NM_134118    | GPSN2             | glycoprotein, synaptic 2                                       | oxidation reduction |
| NM_008212    | HADH              | hydroxyacyl-Coenzyme A dehydrogenase                           | oxidation reduction |

|              |                  |                                                                    |                     |
|--------------|------------------|--------------------------------------------------------------------|---------------------|
| NM_008277    | HPD              | 4-hydroxyphenylpyruvate dioxygenase                                | oxidation reduction |
| NM_173011    | IDH2             | isocitrate dehydrogenase 2 (NADP+), mitochondrial                  | oxidation reduction |
| NM_011830    | IMPDH2           | IMP (inosine monophosphate) dehydrogenase 2                        | oxidation reduction |
| NM_027570    | LDHD             | lactate dehydrogenase D                                            | oxidation reduction |
| NM_010840    | MTHFR            | 5,10-methylenetetrahydrofolate reductase (NADPH)                   | oxidation reduction |
| NM_172607    | NAPRT1           | nicotinate phosphoribosyltransferase domain containing 1           | oxidation reduction |
| NM_011030    | P4HA1            | prolyl 4-hydroxylase, alpha polypeptide I                          | oxidation reduction |
| NM_011031    | P4HA2            | prolyl 4-hydroxylase, alpha polypeptide II                         | oxidation reduction |
| NM_011032    | P4HB             | prolyl 4-hydroxylase, beta polypeptide                             | oxidation reduction |
| NM_008811    | PDHA2            | pyruvate dehydrogenase (lipoamide) alpha 2                         | oxidation reduction |
| NM_007952    | PDIA3            | protein disulfide isomerase family A, member 3                     | oxidation reduction |
| NM_134021    | PNPO             | pyridoxamine 5'-phosphate oxidase                                  | oxidation reduction |
| NM_008898    | POR              | P450 (cytochrome) oxidoreductase                                   | oxidation reduction |
| NM_133819    | PPP1R15B         | protein phosphatase 1, regulatory (inhibitor) subunit 15B          | oxidation reduction |
| NM_011563    | PRDX2            | peroxiredoxin 2                                                    | oxidation reduction |
| NM_007453    | PRDX6            | peroxiredoxin 6                                                    | oxidation reduction |
| NM_008969    | PTGS1            | prostaglandin-endoperoxide synthase 1 (prostaglandin G/H synthase) | oxidation reduction |
| NM_133705    | PYCR2            | pyrroline-5-carboxylate reductase family, member 2                 | oxidation reduction |
| NM_009127    | SCD              | stearoyl-CoA desaturase (delta-9-desaturase)                       | oxidation reduction |
| NM_009128    | SCD2             | stearoyl-Coenzyme A desaturase 2                                   | oxidation reduction |
| NM_080559    | SH3BGRL3         | SH3 domain binding glutamic acid-rich protein like 3               | oxidation reduction |
| NM_145533    | SMOX             | spermine oxidase                                                   | oxidation reduction |
| NM_011434    | SOD1             | superoxide dismutase 1, soluble                                    | oxidation reduction |
| NM_013671    | SOD2             | superoxide dismutase 2, mitochondrial                              | oxidation reduction |
| NM_133186    | STEAP3           | STEAP family member 3                                              | oxidation reduction |
| NM_011539    | TBXAS1           | thromboxane A synthase 1 (platelet)                                | oxidation reduction |
| NM_019913    | TXN2             | thioredoxin 2                                                      | oxidation reduction |
| NM_029582    | TXNDC11          | thioredoxin domain containing 11                                   | oxidation reduction |
| NM_153519    | TXNDC2           | thioredoxin domain-containing 2 (spermatozoa)                      | oxidation reduction |
| NM_016792    | TXNL1            | thioredoxin-like 1                                                 | oxidation reduction |
| NM_001042513 | TXNRD1           | thioredoxin reductase 1                                            | oxidation reduction |
| NM_012037    | VAT1             | vesicle amine transport protein 1 homolog (T. californica)         | oxidation reduction |
| NM_019573    | XKR8             | WW domain containing oxidoreductase                                | oxidation reduction |
| NM_009627    | ADM              | adrenomedullin                                                     | proliferation       |
| NM_030248    | CDK5RAP3 (includ | CDK5 regulatory subunit associated protein 3                       | proliferation       |
| NM_007783    | CSK              | c-src tyrosine kinase                                              | proliferation       |
| NM_008150    | GPC4             | glypican 4                                                         | proliferation       |

|              |                  |                                                                    |                                        |
|--------------|------------------|--------------------------------------------------------------------|----------------------------------------|
| NM_175500    | GPC5             | glypican 5                                                         | proliferation                          |
| NM_021320    | NTN4             | netrin 4                                                           | proliferation                          |
| NM_027088    | BAP1             | BRCA1 associated protein-1 (ubiquitin carboxy-terminal hydrolase   | proliferation                          |
| NM_024223    | CRIP2            | cysteine-rich protein 2                                            | proliferation                          |
| NM_008231    | HDGF             | hepatoma-derived growth factor (high-mobility group protein 1-like | proliferation                          |
| NM_053149    | HEMGN            | hemogen                                                            | proliferation                          |
| NM_025910    | MINA             | MYC induced nuclear antigen                                        | proliferation                          |
| NM_016695    | MPP2             | membrane protein, palmitoylated 2 (MAGUK p55 subfamily memb        | proliferation                          |
| NM_054043    | MSI2             | musashi homolog 2 (Drosophila)                                     | proliferation                          |
| NM_021315    | NOC3L            | nucleolar complex associated 3 homolog (S. cerevisiae)             | proliferation                          |
| NM_021422    | DNAJA4           | DnaJ (Hsp40) homolog, subfamily A, member 4                        | protein folding                        |
| NM_018808    | DNAJB1           | DnaJ (Hsp40) homolog, subfamily B, member 1                        | protein folding                        |
| NM_019965    | DNAJB12          | DnaJ (Hsp40) homolog, subfamily B, member 12                       | protein folding                        |
| NM_020266    | DNAJB2 (includes | DnaJ (Hsp40) homolog, subfamily B, member 2                        | protein folding                        |
| NM_027287    | DNAJB4           | DnaJ (Hsp40) homolog, subfamily B, member 4                        | protein folding                        |
| NM_019964    | DNAJB8           | DnaJ (Hsp40) homolog, subfamily B, member 8                        | protein folding                        |
| NM_013760    | DNAJB9           | DnaJ (Hsp40) homolog, subfamily B, member 9                        | protein folding                        |
| NM_172704    | DNAJC11          | DnaJ (Hsp40) homolog, subfamily C, member 11                       | protein folding                        |
| NM_153571    | HSCB             | HscB iron-sulfur cluster co-chaperone homolog (E. coli)            | protein folding                        |
| NM_010480    | HSP90AA1         | heat shock protein 90kDa alpha (cytosolic), class A member 1       | protein folding                        |
| NM_011631    | HSP90B1          | heat shock protein 90kDa beta (Grp94), member 1                    | protein folding                        |
| NM_028306    | HSPA12B          | heat shock 70kD protein 12B                                        | protein folding                        |
| NM_008300    | HSPA4            | heat shock 70kDa protein 4                                         | protein folding                        |
| NM_022310    | HSPA5            | heat shock 70kDa protein 5 (glucose-regulated protein, 78kDa)      | protein folding                        |
| NM_013560    | HSPB1            | heat shock 27kDa protein 1                                         | protein folding                        |
| NM_013559    | HSPH1            | heat shock 105kDa/110kDa protein 1                                 | protein folding                        |
| NM_021395    | HYOU1            | hypoxia up-regulated 1                                             | protein folding                        |
| NM_021351    | CRYBA4           | crystallin, beta A4                                                | sensory perception (visual perception) |
| NM_173415    | NYX              | nyctalopin                                                         | sensory perception (visual perception) |
| NM_011148    | PPEF2            | protein phosphatase, EF-hand calcium binding domain 2              | sensory perception (visual perception) |
| NM_009038    | RCVRN            | recoverin                                                          | sensory perception (visual perception) |
| NM_018769    | DFNA5            | deafness, autosomal dominant 5                                     | sensory perception of sound            |
| NM_026571    | LHFPL5           | lipoma HMGIC fusion partner-like 5                                 | sensory perception of sound            |
| NM_001077190 | ABI1             | abl-interactor 1                                                   | signaling                              |
| NM_021604    | AGRN             | agrin                                                              | signaling                              |
| NM_054085    | ALPK3            | alpha-kinase 3                                                     | signaling                              |
| NM_009640    | ANGPT1           | angiopoietin 1                                                     | signaling                              |

|              |                   |                                                                        |           |
|--------------|-------------------|------------------------------------------------------------------------|-----------|
| NM_010026    | ASAP1             | ArfGAP with SH3 domain, ankyrin repeat and PH domain 1                 | signaling |
| NM_001039126 | ASB1              | ankyrin repeat and SOCS box-containing 1                               | signaling |
| NM_025758    | ASB17             | ankyrin repeat and SOCS box-containing 17                              | signaling |
| NM_133346    | ASB6              | ankyrin repeat and SOCS box-containing 6                               | signaling |
| NM_177580    | BAIAP2L2          | BAI1-associated protein 2-like 2                                       | signaling |
| NM_007553    | BMP2              | bone morphogenetic protein 2                                           | signaling |
| NM_080708    | BMP2K (includes E | BMP2 inducible kinase                                                  | signaling |
| NM_007554    | BMP4              | bone morphogenetic protein 4                                           | signaling |
| NM_009758    | BMPR1A            | bone morphogenetic protein receptor, type IA                           | signaling |
| NM_009768    | BSG               | basigin (Ok blood group)                                               | signaling |
| NM_172449    | BZRAP1            | benzodiazapine receptor (peripheral) associated protein 1              | signaling |
| NM_027292    | BZRPL1            | benzodiazapine receptor (peripheral)-like 1                            | signaling |
| NM_001042418 | CABYR             | calcium binding tyrosine-(Y)-phosphorylation regulated                 | signaling |
| NM_009790    | CALM1             | calmodulin 1 (phosphorylase kinase, delta)                             | signaling |
| NM_007589    | CALM2             | calmodulin 2 (phosphorylase kinase, delta)                             | signaling |
| NM_144817    | CAMK1G            | calcium/calmodulin-dependent protein kinase IG                         | signaling |
| NM_007595    | CAMK2B            | calcium/calmodulin-dependent protein kinase II beta                    | signaling |
| NM_025821    | CARHSP1           | calcium regulated heat stable protein 1, 24kDa                         | signaling |
| NM_001081493 | CARTPT            | CART prepropeptide                                                     | signaling |
| NM_181858    | CD59              | CD59 molecule, complement regulatory protein                           | signaling |
| NM_028408    | CNIH3             | cornichon homolog 3 (Drosophila)                                       | signaling |
| NM_007758    | CR2               | complement component (3d/Epstein Barr virus) receptor 2                | signaling |
| NM_009970    | CSF2RA (includes  | colony stimulating factor 2 receptor, alpha, low-affinity (granulocyte | signaling |
| NM_007780    | CSF2RB            | colony stimulating factor 2 receptor, beta, low-affinity (granulocyte  | signaling |
| NM_007781    | CSF2RB            | colony stimulating factor 2 receptor, beta, low-affinity (granulocyte  | signaling |
| NM_011932    | DAPP1             | dual adaptor of phosphotyrosine and 3-phosphoinositides                | signaling |
| NM_027539    | DCLK2             | doublecortin-like kinase 2                                             | signaling |
| NM_138306    | DGKZ              | diacylglycerol kinase, zeta 104kDa                                     | signaling |
| NM_146128    | DLGAP4            | discs, large (Drosophila) homolog-associated protein 4                 | signaling |
| NM_010109    | EFNA5             | ephrin-A5                                                              | signaling |
| NM_010111    | EFNB2             | ephrin-B2                                                              | signaling |
| NM_007939    | EPHA8             | EPH receptor A8                                                        | signaling |
| NM_010149    | EPOR              | erythropoietin receptor                                                | signaling |
| NM_010168    | F2                | coagulation factor II (thrombin)                                       | signaling |
| NM_010190    | FCN1              | ficolin (collagen/fibrinogen domain containing) 1                      | signaling |
| NM_199448    | FEZ2              | fasciculation and elongation protein zeta 2 (zygin II)                 | signaling |
| NM_001136063 | GFRA4             | GDNF family receptor alpha 4                                           | signaling |

|              |                    |                                                                      |           |
|--------------|--------------------|----------------------------------------------------------------------|-----------|
| NM_010345    | GRB10              | growth factor receptor-bound protein 10                              | signaling |
| NM_008244    | HGS                | hepatocyte growth factor-regulated tyrosine kinase substrate         | signaling |
| NM_027521    | HMHA1              | histocompatibility (minor) HA-1                                      | signaling |
| NM_011984    | HOMER3             | homer homolog 3 (Drosophila)                                         | signaling |
| NM_010513    | IGF1R              | insulin-like growth factor 1 receptor                                | signaling |
| NM_010566    | INPP5D             | inositol polyphosphate-5-phosphatase, 145kDa                         | signaling |
| NM_178641    | INPP5F             | inositol polyphosphate-5-phosphatase F                               | signaling |
| NM_001134383 | IQSEC1             | IQ motif and Sec7 domain 1                                           | signaling |
| NM_001081212 | IRS2               | insulin receptor substrate 2                                         | signaling |
| NM_015783    | ISG15 (includes EC | ISG15 ubiquitin-like modifier                                        | signaling |
| NM_001081109 | LMTK2              | lemur tyrosine kinase 2                                              | signaling |
| NM_001080390 | MARK2              | MAP/microtubule affinity-regulating kinase 2                         | signaling |
| NM_144800    | MTSS1              | metastasis suppressor 1                                              | signaling |
| NM_019472    | MYO10              | myosin X                                                             | signaling |
| NM_008677    | NCF4               | neutrophil cytosolic factor 4, 40kDa                                 | signaling |
| NM_019744    | NCOA4              | nuclear receptor coactivator 4                                       | signaling |
| NM_022996    | NDFIP1             | Nedd4 family interacting protein 1                                   | signaling |
| NM_010928    | NOTCH2             | Notch homolog 2 (Drosophila)                                         | signaling |
| NM_008716    | NOTCH3             | Notch homolog 3 (Drosophila)                                         | signaling |
| NM_021892    | NPVF               | neuropeptide VF precursor                                            | signaling |
| NM_001081079 | OGFRL1             | opioid growth factor receptor-like 1                                 | signaling |
| NM_146860    | OLFR161            | olfactory receptor 161                                               | signaling |
| NM_001011814 | OLFR524            | olfactory receptor 524                                               | signaling |
| NM_013887    | OPN4               | opsin 4                                                              | signaling |
| NM_013618    | OR51B4             | olfactory receptor, family 51, subfamily B, member 4                 | signaling |
| NM_146959    | OR51M1             | olfactory receptor, family 51, subfamily M, member 1                 | signaling |
| NM_146305    | OR6K2              | olfactory receptor, family 6, subfamily K, member 2                  | signaling |
| NM_001008497 | P2RY14             | purinergic receptor P2Y, G-protein coupled, 14                       | signaling |
| NM_008773    | P2RY2              | purinergic receptor P2Y, G-protein coupled, 2                        | signaling |
| NM_183408    | PDE4A              | phosphodiesterase 4A, cAMP-specific (phosphodiesterase E2 domain)    | signaling |
| NM_172665    | PDK1               | pyruvate dehydrogenase kinase, isozyme 1                             | signaling |
| NM_008840    | PIK3CD             | phosphoinositide-3-kinase, catalytic, delta polypeptide              | signaling |
| NM_177568    | PLCB2              | phospholipase C, beta 2                                              | signaling |
| NM_013880    | PLCL2              | phospholipase C-like 2                                               | signaling |
| NM_153804    | PLEKHG3            | pleckstrin homology domain containing, family G (with RhoGef domain) | signaling |
| NM_008881    | PLXNA1             | plexin A1                                                            | signaling |
| NM_144880    | PPP2R5A            | protein phosphatase 2, regulatory subunit B', alpha isoform          | signaling |

|              |         |                                                               |           |
|--------------|---------|---------------------------------------------------------------|-----------|
| NM_008854    | PRKACA  | protein kinase, cAMP-dependent, catalytic, alpha              | signaling |
| NM_011158    | PRKAR2B | protein kinase, cAMP-dependent, regulatory, type II, beta     | signaling |
| NM_011104    | PRKCE   | protein kinase C, epsilon                                     | signaling |
| NM_021381    | PROKR1  | prokineticin receptor 1                                       | signaling |
| NM_011196    | PTGER3  | prostaglandin E receptor 3 (subtype EP3)                      | signaling |
| NM_001136079 | PTGER4  | prostaglandin E receptor 4 (subtype EP4)                      | signaling |
| NM_172498    | PTK2B   | PTK2B protein tyrosine kinase 2 beta                          | signaling |
| NM_008975    | PTP4A3  | protein tyrosine phosphatase type IVA, member 3               | signaling |
| NM_008976    | PTPN14  | protein tyrosine phosphatase, non-receptor type 14            | signaling |
| NM_008977    | PTPN2   | protein tyrosine phosphatase, non-receptor type 2             | signaling |
| NM_011212    | PTPRE   | protein tyrosine phosphatase, receptor type, E                | signaling |
| NM_008982    | PTPRJ   | protein tyrosine phosphatase, receptor type, J                | signaling |
| NM_181070    | RAB18   | RAB18, member RAS oncogene family                             | signaling |
| NM_009058    | RALGDS  | ral guanine nucleotide dissociation stimulator                | signaling |
| NM_024457    | RAP1B   | RAP1B, member of RAS oncogene family                          | signaling |
| NM_001039086 | RAPGEF1 | Rap guanine nucleotide exchange factor (GEF) 1                | signaling |
| NM_001099624 | RAPGEF2 | Rap guanine nucleotide exchange factor (GEF) 2                | signaling |
| NM_053268    | RASA2   | RAS p21 protein activator 2                                   | signaling |
| NM_178256    | REPS2   | RALBP1 associated Eps domain containing 2                     | signaling |
| NM_016846    | RGL1    | ral guanine nucleotide dissociation stimulator-like 1         | signaling |
| NM_012026    | RGNEF   | Rho-guanine nucleotide exchange factor                        | signaling |
| NM_026418    | RGS10   | regulator of G-protein signaling 10                           | signaling |
| NM_173402    | RGS12   | regulator of G-protein signaling 12                           | signaling |
| NM_015812    | RGS6    | regulator of G-protein signaling 6                            | signaling |
| NM_175092    | RHOF    | ras homolog gene family, member F (in filopodia)              | signaling |
| NM_001081105 | RHOH    | ras homolog gene family, member H                             | signaling |
| NM_177620    | RIN3    | Ras and Rab interactor 3                                      | signaling |
| NM_009708    | RND2    | Rho family GTPase 2                                           | signaling |
| NM_145852    | ROPN1L  | ropporin 1-like                                               | signaling |
| NM_022982    | RTN4R   | reticulon 4 receptor                                          | signaling |
| NM_177708    | RTN4RL1 | reticulon 4 receptor-like 1                                   | signaling |
| NM_001042607 | RYK     | RYK receptor-like tyrosine kinase                             | signaling |
| NM_001081030 | SBF1    | SET binding factor 1                                          | signaling |
| NM_011681    | SCGB1A1 | secretoglobin, family 1A, member 1 (uteroglobin)              | signaling |
| NM_001113481 | SEMA4F  | sema domain, immunoglobulin domain (Ig), transmembrane domain | signaling |
| NM_028534    | SMAP1   | small ArfGAP 1                                                | signaling |
| NM_133716    | SMAP2   | small ArfGAP2                                                 | signaling |

|              |                    |                                                                            |                       |
|--------------|--------------------|----------------------------------------------------------------------------|-----------------------|
| NM_178710    | SNF1LK2            | salt-inducible kinase 2                                                    | signaling             |
| NM_012031    | SPAG1              | sperm associated antigen 1                                                 | signaling             |
| NM_145934    | STAP2              | signal transducing adaptor family member 2                                 | signaling             |
| NM_011491    | STC2               | stanniocalcin 2                                                            | signaling             |
| NM_021537    | STK25              | serine/threonine kinase 25 (STE20 homolog, yeast)                          | signaling             |
| NM_009311    | TAC1               | tachykinin, precursor 1                                                    | signaling             |
| NM_010744    | TMED1              | transmembrane emp24 protein transport domain containing 1                  | signaling             |
| NM_133739    | TMEM123            | transmembrane protein 123                                                  | signaling             |
| NM_009426    | TRH                | thyrotropin-releasing hormone                                              | signaling             |
| NM_197996    | TSPAN15            | tetraspanin 15                                                             | signaling             |
| NM_183180    | TSPAN18            | tetraspanin 18                                                             | signaling             |
| NM_001128081 | TSPAN32            | tetraspanin 32                                                             | signaling             |
| NM_011682    | UTRN               | utrophin                                                                   | signaling             |
| NM_011705    | VRK1               | vaccinia related kinase 1                                                  | signaling             |
| NM_011738    | YWHAH              | tyrosine 3-monooxygenase/tryptophan 5-monooxygenase activator              | signaling             |
| NM_009137    | CCL22              | chemokine (C-C motif) ligand 22                                            | signaling             |
| NM_007657    | CD9                | CD9 molecule                                                               | signaling             |
| NM_029083    | DDIT4              | DNA-damage-inducible transcript 4                                          | signaling             |
| NM_001122733 | KIT                | v-kit Hardy-Zuckerman 4 feline sarcoma viral oncogene homolog              | signaling             |
| NM_013611    | NODAL              | nodal homolog (mouse)                                                      | signaling             |
| NM_207525    | OPA3               | optic atrophy 3 (autosomal recessive, with chorea and spastic paraparesis) | signaling             |
| NM_008772    | P2RY1              | purinergic receptor P2Y, G-protein coupled, 1                              | signaling             |
| NM_001024955 | PIK3R1             | phosphoinositide-3-kinase, regulatory subunit 1 (alpha)                    | signaling             |
| NM_029686    | PKD1L2             | polycystic kidney disease 1-like 2                                         | signaling             |
| NM_172285    | PLCG2              | phospholipase C, gamma 2 (phosphatidylinositol-specific)                   | signaling             |
| NM_018797    | PLXNC1             | plexin C1                                                                  | signaling             |
| NM_053075    | RHEB               | Ras homolog enriched in brain                                              | signaling             |
| NM_133741    | SNRK               | SNF related kinase                                                         | signaling             |
| NM_172734    | STK38L (includes B | serine/threonine kinase 38 like                                            | signaling             |
| NM_011518    | SYK                | spleen tyrosine kinase                                                     | signaling             |
| NM_053093    | TAC4               | tachykinin 4 (hemokinin)                                                   | signaling             |
| NM_146173    | TSPAN33            | tetraspanin 33                                                             | signaling             |
| NM_175638    | WNK4               | WNK lysine deficient protein kinase 4                                      | signaling             |
| NM_009912    | CCR1               | chemokine (C-C motif) receptor 1                                           | signaling (G protein) |
| NM_007718    | CCR1L1             | chemokine (C-C motif) receptor 1-like 1                                    | signaling (G protein) |
| NM_009917    | CCR5               | chemokine (C-C motif) receptor 5                                           | signaling (G protein) |
| NM_007551    | CXCR5              | chemokine (C-X-C motif) receptor 5                                         | signaling (G protein) |



|              |        |                                                                       |                       |
|--------------|--------|-----------------------------------------------------------------------|-----------------------|
| NM_010045    | DARC   | Duffy blood group, chemokine receptor                                 | signaling (G protein) |
| NM_010169    | F2R    | coagulation factor II (thrombin) receptor                             | signaling (G protein) |
| NM_010170    | F2RL2  | coagulation factor II (thrombin) receptor-like 2                      | signaling (G protein) |
| NM_177798    | FRS2   | fibroblast growth factor receptor substrate 2                         | signaling (G protein) |
| NM_010302    | GNA12  | guanine nucleotide binding protein (G protein) alpha 12               | signaling (G protein) |
| NM_008138    | GNAI2  | guanine nucleotide binding protein (G protein), alpha inhibiting acti | signaling (G protein) |
| NM_008559    | MC1R   | melanocortin 1 receptor (alpha melanocyte stimulating hormone re      | signaling (G protein) |
| NM_008561    | MC3R   | melanocortin 3 receptor                                               | signaling (G protein) |
| NM_173764    | TAPT1  | transmembrane anterior posterior transformation 1                     | signaling (G protein) |
| NM_145396    | TBL3   | transducin (beta)-like 3                                              | signaling (G protein) |
| NM_133202    | TRHR2  | thyrotropin releasing hormone receptor 2                              | signaling (G protein) |
| NM_009631    | ADORA3 | adenosine A3 receptor                                                 | signaling (G-protein) |
| NM_007417    | ADRA2A | adrenergic, alpha-2A-, receptor                                       | signaling (G-protein) |
| NM_007420    | ADRB2  | adrenergic, beta-2-, receptor, surface                                | signaling (G-protein) |
| NM_198111    | AKAP6  | A kinase (PRKA) anchor protein 6                                      | signaling (G-protein) |
| NM_177231    | ARRB1  | arrestin, beta 1                                                      | signaling (G-protein) |
| NM_009913    | CCR9   | chemokine (C-C motif) receptor 9                                      | signaling (G-protein) |
| NM_017466    | CCRL2  | chemokine (C-C motif) receptor-like 2                                 | signaling (G-protein) |
| NM_001112697 | CHRM1  | cholinergic receptor, muscarinic 1                                    | signaling (G-protein) |
| NM_009895    | CISH   | cytokine inducible SH2-containing protein                             | signaling (G-protein) |
| NM_007726    | CNR1   | cannabinoid receptor 1 (brain)                                        | signaling (G-protein) |
| NM_007762    | CRHR1  | corticotropin releasing hormone receptor 1                            | signaling (G-protein) |
| NM_007722    | CXCR7  | chemokine (C-X-C motif) receptor 7                                    | signaling (G-protein) |
| NM_172812    | HTR2A  | 5-hydroxytryptamine (serotonin) receptor 2A                           | signaling (G-protein) |
| NM_008313    | HTR4   | 5-hydroxytryptamine (serotonin) receptor 4                            | signaling (G-protein) |
| NM_010483    | HTR5B  | 5-hydroxytryptamine (serotonin) receptor 5B                           | signaling (G-protein) |
| NM_021358    | HTR6   | 5-hydroxytryptamine (serotonin) receptor 6                            | signaling (G-protein) |
| NM_001081141 | GABBR2 | gamma-aminobutyric acid (GABA) B receptor, 2                          | signaling (G-protein) |
| NM_008082    | GALR1  | galanin receptor 1                                                    | signaling (G-protein) |
| NM_001003685 | GHRHR  | growth hormone releasing hormone receptor                             | signaling (G-protein) |
| NM_018771    | GIPC1  | GIPC PDZ domain containing family, member 1                           | signaling (G-protein) |
| NR_003258    | GNAS   | GNAS complex locus                                                    | signaling (G-protein) |
| NM_008141    | GNAT2  | guanine nucleotide binding protein (G protein), alpha transducing a   | signaling (G-protein) |
| NM_010315    | GNG2   | guanine nucleotide binding protein (G protein), gamma 2               | signaling (G-protein) |
| NM_133776    | GPR110 | G protein-coupled receptor 110                                        | signaling (G-protein) |
| NM_001033468 | GPR114 | G protein-coupled receptor 114                                        | signaling (G-protein) |
| NM_001024138 | GPR139 | G protein-coupled receptor 139                                        | signaling (G-protein) |

|              |           |                                                                   |                         |
|--------------|-----------|-------------------------------------------------------------------|-------------------------|
| NM_030258    | GPR146    | G protein-coupled receptor 146                                    | signaling (G-protein)   |
| NM_178406    | GPR153    | G protein-coupled receptor 153                                    | signaling (G-protein)   |
| NM_001080707 | GPR155    | G protein-coupled receptor 155                                    | signaling (G-protein)   |
| NM_177366    | GPR157    | G protein-coupled receptor 157                                    | signaling (G-protein)   |
| NM_173398    | GPR171    | G protein-coupled receptor 171                                    | signaling (G-protein)   |
| NM_011906    | GPR175    | G protein-coupled receptor 175                                    | signaling (G-protein)   |
| NM_134438    | GPR37L1   | G protein-coupled receptor 37 like 1                              | signaling (G-protein)   |
| NM_018882    | GPR56     | G protein-coupled receptor 56                                     | signaling (G-protein)   |
| NM_199058    | GPR6      | G protein-coupled receptor 6                                      | signaling (G-protein)   |
| NM_001079848 | GPR64     | G protein-coupled receptor 64                                     | signaling (G-protein)   |
| NM_175493    | GPR68     | G protein-coupled receptor 68                                     | signaling (G-protein)   |
| NM_173036    | GPR97     | G protein-coupled receptor 97                                     | signaling (G-protein)   |
| NM_153410    | GPSM1     | G-protein signaling modulator 1 (AGS3-like, C. elegans)           | signaling (G-protein)   |
| NM_029522    | GPSM2     | G-protein signaling modulator 2 (AGS3-like, C. elegans)           | signaling (G-protein)   |
| NM_023168    | GRINA     | glutamate receptor, ionotropic, N-methyl D-aspartate-associated p | signaling (G-protein)   |
| NM_013818    | GTPBP1    | GTP binding protein 1                                             | signaling (G-protein)   |
| NM_019581    | GTPBP2    | GTP binding protein 2                                             | signaling (G-protein)   |
| NM_027000    | GTPBP4    | GTP binding protein 4                                             | signaling (G-protein)   |
| NM_178376    | RRAGA     | Ras-related GTP binding A                                         | signaling (GTP binding) |
| NM_001025377 | ARHGAP15  | Rho GTPase activating protein 15                                  | signaling (GTPase)      |
| NM_144529    | ARHGAP17  | Rho GTPase activating protein 17                                  | signaling (GTPase)      |
| NM_001128084 | ARHGAP21  | Rho GTPase activating protein 21                                  | signaling (GTPase)      |
| NM_001037727 | ARHGAP25  | Rho GTPase activating protein 25                                  | signaling (GTPase)      |
| NM_178754    | ARHGAP6   | Rho GTPase activating protein 6                                   | signaling (GTPase)      |
| NM_001112723 | ARHGEF10L | Rho guanine nucleotide exchange factor (GEF) 10-like              | signaling (GTPase)      |
| NM_027144    | ARHGEF12  | Rho guanine nucleotide exchange factor (GEF) 12                   | signaling (GTPase)      |
| NM_019718    | ARL3      | ADP-ribosylation factor-like 3                                    | signaling (GTPase)      |
| NM_007487    | ARL4A     | ADP-ribosylation factor-like 4A                                   | signaling (GTPase)      |
| NM_025768    | GRTP1     | growth hormone regulated TBC protein 1                            | signaling (GTPase)      |
| NM_018738    | IGTP      | interferon gamma induced GTPase                                   | signaling (GTPase)      |
| NM_001039363 | TSC2      | tuberous sclerosis 2                                              | signaling (GTPase)      |
| NM_001110498 | IFNAR2    | interferon (alpha, beta and omega) receptor 2                     | signaling (JAK-STAT)    |
| NM_008337    | IFNG      | interferon, gamma                                                 | signaling (JAK-STAT)    |
| NM_008338    | IFNGR2    | interferon gamma receptor 2 (interferon gamma transducer 1)       | signaling (JAK-STAT)    |
| NM_008348    | IL10RA    | interleukin 10 receptor, alpha                                    | signaling (JAK-STAT)    |
| NM_008349    | IL10RB    | interleukin 10 receptor, beta                                     | signaling (JAK-STAT)    |
| NM_031168    | IL6       | interleukin 6 (interferon, beta 2)                                | signaling (JAK-STAT)    |

|              |           |                                                                      |                                  |
|--------------|-----------|----------------------------------------------------------------------|----------------------------------|
| NM_001134458 | IL9R      | interleukin 9 receptor                                               | signaling (JAK-STAT)             |
| NM_146145    | JAK1      | Janus kinase 1 (a protein tyrosine kinase)                           | signaling (JAK)                  |
| NM_009896    | SOCS1     | suppressor of cytokine signaling 1                                   | signaling (JAK/Stat)             |
| NM_001081308 | TAOK3     | TAO kinase 3                                                         | signaling (JNK)                  |
| NM_016693    | MAP3K6    | mitogen-activated protein kinase kinase kinase 6                     | signaling (MAP and Jun kinase)   |
| NM_016961    | MAPK9     | mitogen-activated protein kinase 9                                   | signaling (MAP and Jun kinase)   |
| NM_011896    | SPRY1     | sprouty homolog 1, antagonist of FGF signaling (Drosophila)          | signaling (MAP kinase, JAK/Stat) |
| NM_011945    | MAP3K1    | mitogen-activated protein kinase kinase kinase 1                     | signaling (MAP kinase, NFkB))    |
| NM_023138    | MAP2K2    | mitogen-activated protein kinase kinase 2                            | signaling (MAP kinase, Ras)      |
| NM_011951    | MAPK14    | mitogen-activated protein kinase 14                                  | signaling (MAP kinase, Ras)      |
| NM_008551    | MAPKAPK2  | mitogen-activated protein kinase-activated protein kinase 2          | signaling (MAP kinase, Ras)      |
| NM_178907    | MAPKAPK3  | mitogen-activated protein kinase-activated protein kinase 3          | signaling (MAP kinase, Ras)      |
| NM_013642    | DUSP1     | dual specificity phosphatase 1                                       | signaling (MAP kinase)           |
| NM_176933    | DUSP4     | dual specificity phosphatase 4                                       | signaling (MAP kinase)           |
| NM_001085390 | DUSP5     | dual specificity phosphatase 5                                       | signaling (MAP kinase)           |
| NM_008748    | DUSP8     | dual specificity phosphatase 8                                       | signaling (MAP kinase)           |
| NM_008006    | FGF2      | fibroblast growth factor 2 (basic)                                   | signaling (MAP kinase)           |
| NM_008928    | MAP2K3    | mitogen-activated protein kinase kinase 3                            | signaling (MAP kinase)           |
| NM_011947    | MAP3K3    | mitogen-activated protein kinase kinase kinase 3                     | signaling (MAP kinase)           |
| NM_025609    | MAP3K7IP1 | mitogen-activated protein kinase kinase kinase 7 interacting protein | signaling (MAP kinase)           |
| NM_015806    | MAPK6     | mitogen-activated protein kinase 6                                   | signaling (MAP kinase)           |
| NM_019920    | MAPKSP1   | MAPK scaffold protein 1                                              | signaling (MAP kinase)           |
| NM_033523    | SPRED2    | sprouty-related, EVH1 domain containing 2                            | signaling (MAP kinase)           |
| NM_145465    | STK24     | serine/threonine kinase 24 (STE20 homolog, yeast)                    | signaling (MAP kinase)           |
| NM_016866    | STK39     | serine threonine kinase 39 (STE20/SPS1 homolog, yeast)               | signaling (MAP kinase)           |
| NM_031199    | TGFA      | transforming growth factor, alpha                                    | signaling (MAP kinase)           |
| NM_021423    | SHANK3    | SH3 and multiple ankyrin repeat domains 3                            | signaling (MAPK)                 |
| NM_019786    | TBK1      | TANK-binding kinase 1                                                | signaling (NFkB)                 |
| NM_145133    | TIFA      | TRAF-interacting protein with forkhead-associated domain             | signaling (NFkB)                 |
| NM_009423    | TRAF4     | TNF receptor-associated factor 4                                     | signaling (NFkB)                 |
| NM_011633    | TRAF5     | TNF receptor-associated factor 5                                     | signaling (NFkB)                 |
| NM_180662    | TRAPPC9   | trafficking protein particle complex 9                               | signaling (NFkB)                 |
| NM_134023    | TBC1D10A  | TBC1 domain family, member 10A                                       | signaling (Rab GTPase activity)  |
| NM_025706    | TBC1D15   | TBC1 domain family, member 15                                        | signaling (Rab GTPase activity)  |
| NM_173186    | TBC1D24   | TBC1 domain family, member 24                                        | signaling (Rab GTPase activity)  |
| NM_194334    | TBC1D2B   | TBC1 domain family, member 2B                                        | signaling (Rab GTPase activity)  |
| NM_025935    | TBC1D7    | TBC1 domain family, member 7                                         | signaling (Rab GTPase activity)  |

|              |                   |                                                          |                                       |
|--------------|-------------------|----------------------------------------------------------|---------------------------------------|
| NM_001111304 | TBC1D9            | TBC1 domain family, member 9 (with GRAM domain)          | signaling (Rab GTPase activity)       |
| NM_134091    | SGSM3             | small G protein signaling modulator 3                    | signaling (Rab GTPase)                |
| NM_001081396 | WDR67             | WD repeat domain 67                                      | signaling (Rab GTPase)                |
| NM_013716    | G3BP1             | GTPase activating protein (SH3 domain) binding protein 1 | signaling (Ras protein)               |
| NM_010815    | GRAP2             | GRB2-related adaptor protein 2                           | signaling (Ras protein)               |
| NM_008163    | GRB2              | growth factor receptor-bound protein 2                   | signaling (Ras protein)               |
| NM_021284    | KRAS              | v-Ki-ras2 Kirsten rat sarcoma viral oncogene homolog     | signaling (Ras protein)               |
| NM_013571    | KSR1              | kinase suppressor of ras 1                               | signaling (Ras protein)               |
| NM_010689    | LAT               | linker for activation of T cells                         | signaling (Ras protein)               |
| NM_009105    | RSU1              | Ras suppressor protein 1                                 | signaling (ras)                       |
| NM_001002267 | TMEM158           | transmembrane protein 158                                | signaling (ras)                       |
| NM_009384    | TIAM1             | T-cell lymphoma invasion and metastasis 1                | signaling (Rho GTPase)                |
| NM_001081302 | TRIO              | triple functional domain (PTPRF interacting)             | signaling (Rho GTPase)                |
| NM_026257    | UBXN11            | UBX domain protein 11                                    | signaling (Rho GTPase)                |
| NM_001113246 | CHN1 (includes EC | chimerin (chimaerin) 1                                   | signaling (Rho GTPases)               |
| NM_178683    | DEPDC1B           | DEP domain containing 1B                                 | signaling (Rho GTPases)               |
| NM_008385    | INPP5B            | inositol polyphosphate-5-phosphatase, 75kDa              | signaling (Rho GTPases)               |
| NM_001110276 | ITSN1             | intersectin 1 (SH3 domain protein)                       | signaling (Rho protein)               |
| NM_011691    | VAV1              | vav 1 guanine nucleotide exchange factor                 | signaling (Rho, GTP binding proteins) |
| NM_029332    | AKAP13            | A kinase (PRKA) anchor protein 13                        | signaling (Rho)                       |
| NM_001001602 | DAB2IP            | DAB2 interacting protein                                 | signaling (small GTPase)              |
| NM_001015046 | GARNL4            | GTPase activating Rap/RanGAP domain-like 4               | signaling (small GTPase)              |
| NM_010276    | GEM               | GTP binding protein overexpressed in skeletal muscle     | signaling (small GTPase)              |
| NM_145541    | HCG 1757335       | hCG1757335                                               | signaling (small GTPase)              |
| NM_027711    | IQGAP2            | IQ motif containing GTPase activating protein 2          | signaling (small GTPase)              |
| NM_011379    | SIPA1             | signal-induced proliferation-associated 1                | signaling (small GTPase)              |
| NM_172579    | SIPA1L1           | signal-induced proliferation-associated 1 like 1         | signaling (small GTPase)              |
| NM_016788    | TNK2              | tyrosine kinase, non-receptor, 2                         | signaling (small GTPase)              |
| NM_007395    | ACVR1B            | activin A receptor, type IB                              | signaling (TGF beta)                  |
| NM_009612    | ACVRL1            | activin A receptor type II-like 1                        | signaling (TGF beta)                  |
| NM_008107    | GDF1              | growth differentiation factor 1                          | signaling (TGF beta)                  |
| NM_153587    | RPS6KA5           | ribosomal protein S6 kinase, 90kDa, polypeptide 5        | signaling (TGF beta)                  |
| NM_016769    | SMAD3             | SMAD family member 3                                     | signaling (TGF beta)                  |
| NM_008542    | SMAD6             | SMAD family member 6                                     | signaling (TGF beta)                  |
| NM_001042660 | SMAD7             | SMAD family member 7                                     | signaling (TGF beta)                  |
| NM_011578    | TGFBR3            | transforming growth factor, beta receptor III            | signaling (TGF beta)                  |
| NM_019919    | LTBP1             | latent transforming growth factor beta binding protein 1 | signaling (TGFbeta)                   |

|              |                 |                                                                     |                                        |
|--------------|-----------------|---------------------------------------------------------------------|----------------------------------------|
| NM_011577    | TGFB1           | transforming growth factor, beta 1                                  | signaling (TGFbeta)                    |
| NM_009371    | TGFB2           | transforming growth factor, beta receptor II (70/80kDa)             | signaling (TGFbeta)                    |
| NM_178931    | TNFRSF14        | tumor necrosis factor receptor superfamily, member 14 (herpesvirus) | signaling (TNF)                        |
| NM_001034097 | TNFSF12-TNFSF13 | TNFSF12-TNFSF13 readthrough transcript                              | signaling (TNF)                        |
| NM_010228    | FLT1            | fms-related tyrosine kinase 1 (vascular endothelial growth factor/v | signaling (VEGF)                       |
| NM_010612    | KDR             | kinase insert domain receptor (a type III receptor tyrosine kinase) | signaling (VEGF)                       |
| NM_025367    | SPHK1           | sphingosine kinase 1                                                | signaling (VEGF)                       |
| NM_001025250 | VEGFA           | vascular endothelial growth factor A                                | signaling (VEGF)                       |
| NM_009771    | BTRC            | beta-transducin repeat containing                                   | signaling (Wnt)                        |
| NM_008043    | FRAT1           | frequently rearranged in advanced T-cell lymphomas                  | signaling (Wnt)                        |
| NM_001040689 | RSPO4           | R-spondin family, member 4                                          | signaling (wnt)                        |
| NM_177545    | VANG1           | vang-like 1 (van gogh, Drosophila)                                  | signaling (Wnt)                        |
| NM_009521    | WNT3            | wingless-type MMTV integration site family, member 3                | signaling (Wnt)                        |
| NM_009522    | WNT3A           | wingless-type MMTV integration site family, member 3A               | signaling (Wnt)                        |
| NM_009259    | SPN             | sialophorin                                                         | signaling, immune function             |
| NM_019508    | IL17B           | interleukin 17B                                                     | signaling, immune response             |
| NM_008362    | IL1R1           | interleukin 1 receptor, type I                                      | signaling, immune response             |
| NM_010555    | IL1R2           | interleukin 1 receptor, type II                                     | signaling, immune response             |
| NM_008364    | IL1RAP          | interleukin 1 receptor accessory protein                            | signaling, immune response             |
| NM_133193    | IL1RL2          | interleukin 1 receptor-like 2                                       | signaling, immune response             |
| NM_010696    | LCP2            | lymphocyte cytosolic protein 2 (SH2 domain containing leukocyte     | signaling, immune response             |
| NM_001039537 | LIF             | leukemia inhibitory factor (cholinergic differentiation factor)     | signaling, immune response             |
| NM_028773    | SASH3           | SAM and SH3 domain containing 3                                     | signaling, immune response             |
| NM_021343    | SPATA5          | spermatogenesis associated 5                                        | spermatogenesis                        |
| NM_028852    | SPATC1          | spermatogenesis and centriole associated 1                          | spermatogenesis                        |
| NM_007570    | BTG2            | BTG family, member 2                                                | transcription                          |
| NM_019726    | GPS2            | G protein pathway suppressor 2                                      | transcription                          |
| NM_025541    | ASF1A           | ASF1 anti-silencing function 1 homolog A (S. cerevisiae)            | transcription (chromatin modification) |
| NM_016812    | BANP            | BTG3 associated nuclear protein                                     | transcription (chromatin modification) |
| NM_021531    | CARM1           | coactivator-associated arginine methyltransferase 1                 | transcription (chromatin modification) |
| NM_028763    | CBX6            | chromobox homolog 6                                                 | transcription (chromatin modification) |
| NM_144811    | CBX7            | chromobox homolog 7                                                 | transcription (chromatin modification) |
| NM_009881    | CDYL            | chromodomain protein, Y-like                                        | transcription (chromatin modification) |
| NM_146019    | CHD3            | chromodomain helicase DNA binding protein 3                         | transcription (chromatin modification) |
| NM_058212    | DPF3            | D4, zinc and double PHD fingers, family 3                           | transcription (chromatin modification) |
| NM_145508    | DYRK3           | dual-specificity tyrosine-(Y)-phosphorylation regulated kinase 3    | transcription (chromatin modification) |
| NM_001109686 | EHMT1           | euchromatic histone-lysine N-methyltransferase 1                    | transcription (chromatin modification) |

|              |                    |                                                                  |                                        |
|--------------|--------------------|------------------------------------------------------------------|----------------------------------------|
| NM_007970    | EZH1               | enhancer of zeste homolog 1 (Drosophila)                         | transcription (chromatin modification) |
| NM_144919    | HDAC11             | histone deacetylase 11                                           | transcription (chromatin modification) |
| NM_001033430 | JHDM1D             | jumonji C domain containing histone demethylase 1 homolog D (S   | transcription (chromatin modification) |
| NM_001038695 | JMJD1A             | jumonji domain containing 1A                                     | transcription (chromatin modification) |
| NM_001081256 | JMJD1B             | jumonji domain containing 1B                                     | transcription (chromatin modification) |
| NM_029842    | JMJD5              | jumonji domain containing 5                                      | transcription (chromatin modification) |
| NM_026796    | SMYD2              | SET and MYND domain containing 2                                 | transcription (chromatin modification) |
| NM_001081362 | TRRAP              | transformation/transcription domain-associated protein           | transcription (chromatin modification) |
| NM_001001735 | WHSC1L1            | Wolf-Hirschhorn syndrome candidate 1-like 1                      | transcription (chromatin modification) |
| NM_019673    | ACTL6A             | actin-like 6A                                                    | transcription (chromatin remodeling)   |
| NM_001085355 | ARID1B             | AT rich interactive domain 1B (SWI1-like)                        | transcription (chromatin remodeling)   |
| NM_054078    | BAZ2A              | bromodomain adjacent to zinc finger domain, 2A                   | transcription (chromatin remodeling)   |
| NM_053068    | CHRA1              | chromatin accessibility complex 1                                | transcription (chromatin remodeling)   |
| NM_020004    | KAT2A              | K(lysine) acetyltransferase 2A                                   | transcription (chromatin remodeling)   |
| NM_020005    | KAT2B              | K(lysine) acetyltransferase 2B                                   | transcription (chromatin remodeling)   |
| NM_019390    | LMNA               | lamin A/C                                                        | transcription (chromatin remodeling)   |
| NM_010773    | MBD2               | methyl-CpG binding domain protein 2                              | transcription (chromatin remodeling)   |
| NM_009211    | SMARCC1            | SWI/SNF related, matrix associated, actin dependent regulator of | transcription (chromatin remodeling)   |
| NM_010238    | BRD2               | bromodomain containing 2                                         | transcription (chromatin)              |
| NM_012047    | BRD7               | bromodomain containing 7                                         | transcription (chromatin)              |
| NM_009410    | TOP3A              | topoisomerase (DNA) III alpha                                    | transcription (DNA topological change) |
| NM_011624    | TOP3B              | topoisomerase (DNA) III beta                                     | transcription (DNA topological change) |
| NM_170777    | ELOF1              | elongation factor 1 homolog (S. cerevisiae)                      | transcription (elongation)             |
| NM_009089    | POLR2A             | polymerase (RNA) II (DNA directed) polypeptide A, 220kDa         | transcription (elongation)             |
| NM_030229    | POLR3H             | polymerase (RNA) III (DNA directed) polypeptide H (22.9kD)       | transcription (elongation)             |
| NM_009296    | SUPT4H1            | suppressor of Ty 4 homolog 1 (S. cerevisiae)                     | transcription (elongation)             |
| NM_001080706 | BTAF1              | BTAF1 RNA polymerase II, B-TFIID transcription factor-associated | transcription (initiation)             |
| NM_138953    | ELL2               | elongation factor, RNA polymerase II, 2                          | transcription (initiation)             |
| NM_031391    | GTF2A1             | general transcription factor IIA, 1, 19/37kDa                    | transcription (initiation)             |
| NM_133801    | GTF2F1             | general transcription factor IIF, polypeptide 1, 74kDa           | transcription (initiation)             |
| NM_172977    | GTF3C4             | general transcription factor IIIC, polypeptide 4, 90kDa          | transcription (initiation)             |
| NM_148928    | GTF3C5             | general transcription factor IIIC, polypeptide 5, 63kDa          | transcription (initiation)             |
| NM_026113    | GTF3C6             | general transcription factor IIIC, polypeptide 6, alpha 35kDa    | transcription (initiation)             |
| NM_009645    | AICDA              | activation-induced cytidine deaminase                            | transcription (mRNA processing)        |
| NM_138669    | EIF4A3 (includes E | eukaryotic translation initiation factor 4A, isoform 3           | transcription (mRNA processing)        |
| NM_182650    | HNRNPA2B1          | heterogeneous nuclear ribonucleoprotein A2/B1                    | transcription (mRNA processing)        |
| NM_133834    | HNRNPF             | heterogeneous nuclear ribonucleoprotein F                        | transcription (mRNA processing)        |

|              |                   |                                                                        |                                 |
|--------------|-------------------|------------------------------------------------------------------------|---------------------------------|
| NM_021510    | HNRNPH1           | heterogeneous nuclear ribonucleoprotein H1 (H)                         | transcription (mRNA processing) |
| NM_011112    | PAPOLA            | poly(A) polymerase alpha                                               | transcription (mRNA processing) |
| NM_001081118 | PHRF1             | PHD and ring finger domains 1                                          | transcription (mRNA processing) |
| NM_026045    | PRPF18            | PRP18 pre-mRNA processing factor 18 homolog (S. cerevisiae)            | transcription (mRNA processing) |
| NM_013830    | PRPF4B            | PRP4 pre-mRNA processing factor 4 homolog B (yeast)                    | transcription (mRNA processing) |
| NM_008956    | PTBP1             | polypyrimidine tract binding protein 1                                 | transcription (mRNA processing) |
| NM_001139511 | RALY              | RNA binding protein, autoantigenic (hnRNP-associated with lethal       | transcription (mRNA processing) |
| NM_018765    | WBP4              | WW domain binding protein 4 (formin binding protein 21)                | transcription (mRNA processing) |
| NM_001080981 | DDX23             | DEAD (Asp-Glu-Ala-Asp) box polypeptide 23                              | transcription (mRNA splicing)   |
| NM_007840    | DDX5              | DEAD (Asp-Glu-Ala-Asp) box polypeptide 5                               | transcription (mRNA splicing)   |
| NM_144831    | DHX8              | DEAH (Asp-Glu-Ala-His) box polypeptide 8                               | transcription (mRNA splicing)   |
| NM_139149    | FUS               | fusion (involved in t(12;16) in malignant liposarcoma)                 | transcription (mRNA splicing)   |
| NM_018739    | RP9               | retinitis pigmentosa 9 (autosomal dominant)                            | transcription (mRNA splicing)   |
| NM_026175    | SF3A1             | splicing factor 3a, subunit 1, 120kDa                                  | transcription (mRNA splicing)   |
| NM_175102    | SF3B5             | splicing factor 3b, subunit 5, 10kDa                                   | transcription (mRNA splicing)   |
| NM_023603    | SFPQ              | splicing factor proline/glutamine-rich (polypyrimidine tract binding p | transcription (mRNA splicing)   |
| NM_016680    | SFRS16            | splicing factor, arginine/serine-rich 16                               | transcription (mRNA splicing)   |
| NM_011358    | SFRS2             | splicing factor, arginine/serine-rich 2                                | transcription (mRNA splicing)   |
| NM_013663    | SFRS3             | splicing factor, arginine/serine-rich 3                                | transcription (mRNA splicing)   |
| NM_172429    | SMNDC1            | survival motor neuron domain containing 1                              | transcription (mRNA splicing)   |
| NM_021336    | SNRPA1            | small nuclear ribonucleoprotein polypeptide A'                         | transcription (mRNA splicing)   |
| NM_016799    | SRRM1             | serine/arginine repetitive matrix 1                                    | transcription (mRNA splicing)   |
| NM_001038608 | TXNL4A (includes  | thioredoxin-like 4A                                                    | transcription (mRNA splicing)   |
| NM_133671    | U2AF2 (includes E | U2 small nuclear RNA auxiliary factor 2                                | transcription (mRNA splicing)   |
| NM_001113564 | SERBP1            | SERPINE1 mRNA binding protein 1                                        | transcription (mRNA stability)  |
| NM_026252    | CPEB4             | cytoplasmic polyadenylation element binding protein 4                  | transcription (polyadenylation) |
| NM_010678    | AFF3              | AF4/FMR2 family, member 3                                              | transcription (regulation)      |
| NM_026375    | AHCTF1            | AT hook containing transcription factor 1                              | transcription (regulation)      |
| NM_146155    | AHDC1             | AT hook, DNA binding motif, containing 1                               | transcription (regulation)      |
| NM_016666    | AIP               | aryl hydrocarbon receptor interacting protein                          | transcription (regulation)      |
| NM_001081379 | ANKRD11           | ankyrin repeat domain 11                                               | transcription (regulation)      |
| NM_009124    | ATXN1             | ataxin 1                                                               | transcription (regulation)      |
| NM_007520    | BACH1             | BTB and CNC homology 1, basic leucine zipper transcription facto       | transcription (regulation)      |
| NM_001045523 | BAHD1             | bromo adjacent homology domain containing 1                            | transcription (regulation)      |
| NM_016707    | BCL11A            | B-cell CLL/lymphoma 11A (zinc finger protein)                          | transcription (regulation)      |
| NM_175045    | BCOR              | BCL6 co-repressor                                                      | transcription (regulation)      |
| NM_001081315 | BRPF3             | bromodomain and PHD finger containing, 3                               | transcription (regulation)      |

|              |                  |                                                                       |                            |
|--------------|------------------|-----------------------------------------------------------------------|----------------------------|
| NM_007569    | BTG1             | B-cell translocation gene 1, anti-proliferative                       | transcription (regulation) |
| NM_025824    | BZW1             | basic leucine zipper and W2 domains 1                                 | transcription (regulation) |
| NM_001081557 | CAMTA1 (includes | calmodulin binding transcription activator 1                          | transcription (regulation) |
| NM_027994    | CAND1            | cullin-associated and neddylation-dissociated 1                       | transcription (regulation) |
| NM_009824    | CBFA2T3          | core-binding factor, runt domain, alpha subunit 2; translocated to, 3 | transcription (regulation) |
| NM_009834    | CCRN4L           | CCR4 carbon catabolite repression 4-like (S. cerevisiae)              | transcription (regulation) |
| NM_198164    | CDC2L6           | cell division cycle 2-like 6 (CDK8-like)                              | transcription (regulation) |
| NM_207131    | CEBPE            | CCAAT/enhancer binding protein (C/EBP), epsilon                       | transcription (regulation) |
| NM_010828    | CITED2           | Cbp/p300-interacting transactivator, with Glu/Asp-rich carboxy-term   | transcription (regulation) |
| NM_019563    | CITED4           | Cbp/p300-interacting transactivator, with Glu/Asp-rich carboxy-term   | transcription (regulation) |
| NM_001037848 | CNOT2            | CCR4-NOT transcription complex, subunit 2                             | transcription (regulation) |
| NM_133850    | COMM7            | COMM domain containing 7                                              | transcription (regulation) |
| NM_011957    | CREB3L1          | cAMP responsive element binding protein 3-like 1                      | transcription (regulation) |
| NM_011804    | CREG1            | cellular repressor of E1A-stimulated genes 1                          | transcription (regulation) |
| NM_001110854 | CREM             | cAMP responsive element modulator                                     | transcription (regulation) |
| NM_173863    | CRTC3            | CREB regulated transcription coactivator 3                            | transcription (regulation) |
| NM_001113333 | CRY2             | cryptochrome 2 (photolyase-like)                                      | transcription (regulation) |
| NM_011733    | CSDA             | cold shock domain protein A                                           | transcription (regulation) |
| NM_013502    | CTBP1            | C-terminal binding protein 1                                          | transcription (regulation) |
| NM_009986    | CUX1             | cut-like homeobox 1                                                   | transcription (regulation) |
| NM_007837    | DDIT3            | DNA-damage-inducible transcript 3                                     | transcription (regulation) |
| NM_175647    | DMRTA1           | DMRT-like family A1                                                   | transcription (regulation) |
| NM_013874    | DPF1             | D4, zinc and double PHD fingers family 1                              | transcription (regulation) |
| NM_177733    | E2F2             | E2F transcription factor 2                                            | transcription (regulation) |
| NM_148952    | E2F4             | E2F transcription factor 4, p107/p130-binding                         | transcription (regulation) |
| NM_028932    | EAF1             | ELL associated factor 1                                               | transcription (regulation) |
| NM_025456    | EAPP             | E2F-associated phosphoprotein                                         | transcription (regulation) |
| NM_007913    | EGR1             | early growth response 1                                               | transcription (regulation) |
| NM_010155    | ERF              | Ets2 repressor factor                                                 | transcription (regulation) |
| NM_133659    | ERG              | v-ets erythroblastosis virus E26 oncogene homolog (avian)             | transcription (regulation) |
| NM_011809    | ETS2             | v-ets erythroblastosis virus E26 oncogene homolog 2 (avian)           | transcription (regulation) |
| NM_007961    | ETV6             | ets variant 6                                                         | transcription (regulation) |
| NM_001003953 | FBXL10           | F-box and leucine-rich repeat protein 10                              | transcription (regulation) |
| NM_010211    | FHL1             | four and a half LIM domains 1                                         | transcription (regulation) |
| NM_008026    | FLI1             | Friend leukemia virus integration 1                                   | transcription (regulation) |
| NM_010234    | FOS              | v-fos FBJ murine osteosarcoma viral oncogene homolog                  | transcription (regulation) |
| NM_008036    | FOSB             | FBJ murine osteosarcoma viral oncogene homolog B                      | transcription (regulation) |



|              |          |                                                                |                            |
|--------------|----------|----------------------------------------------------------------|----------------------------|
| NM_008023    | FOXB2    | forkhead box B2                                                | transcription (regulation) |
| NM_008593    | FOXD2    | forkhead box D2                                                | transcription (regulation) |
| NM_019740    | FOXO3    | forkhead box O3                                                | transcription (regulation) |
| NM_177136    | FRYL     | FRY-like                                                       | transcription (regulation) |
| NM_008089    | GATA1    | GATA binding protein 1 (globin transcription factor 1)         | transcription (regulation) |
| NM_008090    | GATA2    | GATA binding protein 2                                         | transcription (regulation) |
| NM_001113345 | GATAD2A  | GATA zinc finger domain containing 2A                          | transcription (regulation) |
| NM_010278    | GFI1     | growth factor independent 1 transcription repressor            | transcription (regulation) |
| NM_008114    | GFI1B    | growth factor independent 1B transcription repressor           | transcription (regulation) |
| NM_147221    | GLIS1    | GLIS family zinc finger 1                                      | transcription (regulation) |
| NM_001122963 | GPBP1    | GC-rich promoter binding protein 1                             | transcription (regulation) |
| NM_008213    | HAND1    | heart and neural crest derivatives expressed 1                 | transcription (regulation) |
| NM_010402    | HAND2    | heart and neural crest derivatives expressed 2                 | transcription (regulation) |
| NM_177993    | HBP1     | HMG-box transcription factor 1                                 | transcription (regulation) |
| NM_008235    | HES1     | hairy and enhancer of split 1, (Drosophila)                    | transcription (regulation) |
| NM_008245    | HHEX     | hematopoietically expressed homeobox                           | transcription (regulation) |
| NM_178922    | HIC2     | hypermethylated in cancer 2                                    | transcription (regulation) |
| NM_010432    | HIPK1    | homeodomain interacting protein kinase 1                       | transcription (regulation) |
| NM_001136065 | HIPK2    | homeodomain interacting protein kinase 2                       | transcription (regulation) |
| NM_007772    | HIVEP1   | human immunodeficiency virus type I enhancer binding protein 1 | transcription (regulation) |
| NM_008250    | HLX      | H2.0-like homeobox                                             | transcription (regulation) |
| NM_010441    | HMGA2    | high mobility group AT-hook 2                                  | transcription (regulation) |
| NM_013920    | HNF4G    | hepatocyte nuclear factor 4, gamma                             | transcription (regulation) |
| NM_010448    | HNRNPAB  | heterogeneous nuclear ribonucleoprotein A/B                    | transcription (regulation) |
| NM_175606    | HOPX     | HOP homeobox                                                   | transcription (regulation) |
| NM_024219    | HSBP1    | heat shock factor binding protein 1                            | transcription (regulation) |
| NM_013562    | IFRD1    | interferon-related developmental regulator 1                   | transcription (regulation) |
| NM_001025597 | IKZF1    | IKAROS family zinc finger 1 (Ikaros)                           | transcription (regulation) |
| NM_011770    | IKZF2    | IKAROS family zinc finger 2 (Helios)                           | transcription (regulation) |
| NM_011919    | ING1     | inhibitor of growth family, member 1                           | transcription (regulation) |
| NM_016889    | INSM1    | insulinoma-associated 1                                        | transcription (regulation) |
| NM_010574    | IRX2     | iroquois homeobox 2                                            | transcription (regulation) |
| NM_001039511 | IVNS1ABP | influenza virus NS1A binding protein                           | transcription (regulation) |
| NM_021878    | JARID2   | jumonji, AT rich interactive domain 2                          | transcription (regulation) |
| NM_010591    | JUN      | jun oncogene                                                   | transcription (regulation) |
| NM_010592    | JUND     | jun D proto-oncogene                                           | transcription (regulation) |
| NM_010635    | KLF1     | Kruppel-like factor 1 (erythroid)                              | transcription (regulation) |

|              |                   |                                                                   |                            |
|--------------|-------------------|-------------------------------------------------------------------|----------------------------|
| NM_013692    | KLF10             | Kruppel-like factor 10                                            | transcription (regulation) |
| NM_178357    | KLF11             | Kruppel-like factor 11                                            | transcription (regulation) |
| NM_010636    | KLF12             | Kruppel-like factor 12                                            | transcription (regulation) |
| NM_021366    | KLF13             | Kruppel-like factor 13                                            | transcription (regulation) |
| NM_078477    | KLF16             | Kruppel-like factor 16                                            | transcription (regulation) |
| NM_009769    | KLF5              | Kruppel-like factor 5 (intestinal)                                | transcription (regulation) |
| NM_011803    | KLF6              | Kruppel-like factor 6                                             | transcription (regulation) |
| NM_033563    | KLF7              | Kruppel-like factor 7 (ubiquitous)                                | transcription (regulation) |
| NM_010638    | KLF9              | Kruppel-like factor 9                                             | transcription (regulation) |
| NM_029789    | LASS2             | LAG1 homolog, ceramide synthase 2                                 | transcription (regulation) |
| NM_172154    | LCOR              | ligand dependent nuclear receptor corepressor                     | transcription (regulation) |
| NM_010697    | LDB1              | LIM domain binding 1                                              | transcription (regulation) |
| NM_001039522 | LEO1              | Leo1, Paf1/RNA polymerase II complex component, homolog (S. d     | transcription (regulation) |
| NM_172397    | LIMD2             | LIM domain containing 2                                           | transcription (regulation) |
| NM_001115010 | LIN54             | lin-54 homolog (C. elegans)                                       | transcription (regulation) |
| NM_001142337 | LMO2              | LIM domain only 2 (rhombotin-like 1)                              | transcription (regulation) |
| NM_028233    | LRPPRC            | leucine-rich PPR-motif containing                                 | transcription (regulation) |
| NM_008535    | LYL1              | lymphoblastic leukemia derived sequence 1                         | transcription (regulation) |
| NM_199364    | LZTS1             | leucine zipper, putative tumor suppressor 1                       | transcription (regulation) |
| NM_008558    | MAX               | MYC associated factor X                                           | transcription (regulation) |
| NM_008565    | MCM4              | minichromosome maintenance complex component 4                    | transcription (regulation) |
| NM_172424    | MED13L            | mediator complex subunit 13-like                                  | transcription (regulation) |
| NM_027213    | MED6              | mediator complex subunit 6                                        | transcription (regulation) |
| NM_134250    | MED7 (includes EC | mediator complex subunit 7                                        | transcription (regulation) |
| NM_025282    | MEF2C             | myocyte enhancer factor 2C                                        | transcription (regulation) |
| NM_026830    | RREB1             | ras responsive element binding protein 1                          | transcription (regulation) |
| NM_009821    | RUNX1             | runt-related transcription factor 1                               | transcription (regulation) |
| NM_011305    | RXRA              | retinoid X receptor, alpha                                        | transcription (regulation) |
| NM_009107    | RXRG              | retinoid X receptor, gamma                                        | transcription (regulation) |
| NM_183426    | SBNO2             | strawberry notch homolog 2 (Drosophila)                           | transcription (regulation) |
| NM_130893    | SCRT1             | scratch homolog 1, zinc finger protein (Drosophila)               | transcription (regulation) |
| NM_018820    | SERTAD1           | SERTA domain containing 1                                         | transcription (regulation) |
| NM_001038625 | SERTAD2           | SERTA domain containing 2                                         | transcription (regulation) |
| NM_001113559 | SOX5 (includes EC | SRY (sex determining region Y)-box 5                              | transcription (regulation) |
| NM_011445    | SOX6              | SRY (sex determining region Y)-box 6                              | transcription (regulation) |
| NM_011355    | SPI1              | spleen focus forming virus (SFFV) proviral integration oncogene s | transcription (regulation) |
| NM_030237    | SPZ1              | spermatogenic leucine zipper 1                                    | transcription (regulation) |

|              |                   |                                                                       |                            |
|--------------|-------------------|-----------------------------------------------------------------------|----------------------------|
| NM_033218    | SREBF2            | sterol regulatory element binding transcription factor 2              | transcription (regulation) |
| NM_023672    | SSBP3             | single stranded DNA binding protein 3                                 | transcription (regulation) |
| NM_178652    | SUPT3H (includes  | suppressor of Ty 3 homolog (S. cerevisiae)                            | transcription (regulation) |
| NM_146177    | SUV420H2          | suppressor of variegation 4-20 homolog 2 (Drosophila)                 | transcription (regulation) |
| NM_011527    | TAL1              | T-cell acute lymphocytic leukemia 1                                   | transcription (regulation) |
| NM_009319    | TARBP2            | TAR (HIV-1) RNA binding protein 2                                     | transcription (regulation) |
| NM_032005    | TBX19             | T-box 19                                                              | transcription (regulation) |
| NM_025804    | TCF25             | transcription factor 25 (basic helix-loop-helix)                      | transcription (regulation) |
| NM_011548    | TCF3              | transcription factor 3 (E2A immunoglobulin enhancer binding factor)   | transcription (regulation) |
| NM_009335    | TFAP2C            | transcription factor AP-2 gamma (activating enhancer binding protein) | transcription (regulation) |
| NM_178667    | TFDP2             | transcription factor Dp-2 (E2F dimerization partner 2)                | transcription (regulation) |
| NM_009372    | TGIF1             | TGFB-induced factor homeobox 1                                        | transcription (regulation) |
| NM_146153    | THRAP3            | thyroid hormone receptor associated protein 3                         | transcription (regulation) |
| NM_198634    | TIGD3 (includes E | tigger transposable element derived 3                                 | transcription (regulation) |
| NM_011605    | TMPO              | thymopoietin                                                          | transcription (regulation) |
| NM_009427    | TOB1              | transducer of ERBB2, 1                                                | transcription (regulation) |
| NM_001098799 | TOX2              | TOX high mobility group box family member 2                           | transcription (regulation) |
| NM_011280    | TRIM10            | tripartite motif-containing 10                                        | transcription (regulation) |
| NM_009546    | TRIM25            | tripartite motif-containing 25                                        | transcription (regulation) |
| NM_009366    | TSC22D1           | TSC22 domain family, member 1                                         | transcription (regulation) |
| NM_010286    | TSC22D3           | TSC22 domain family, member 3                                         | transcription (regulation) |
| NM_054040    | TULP4             | tubby like protein 4                                                  | transcription (regulation) |
| NM_172253    | TWISTNB           | TWIST neighbor                                                        | transcription (regulation) |
| NM_001009935 | TXNIP             | thioredoxin interacting protein                                       | transcription (regulation) |
| NM_001083319 | UBP1              | upstream binding protein 1 (LBP-1a)                                   | transcription (regulation) |
| NM_023054    | UTP3              | UTP3, small subunit (SSU) processome component, homolog (S.           | transcription (regulation) |
| NM_007701    | VSX2              | visual system homeobox 2                                              | transcription (regulation) |
| NM_178744    | ZBTB1             | zinc finger and BTB domain containing 1                               | transcription (regulation) |
| NM_198886    | ZBTB12            | zinc finger and BTB domain containing 12                              | transcription (regulation) |
| NM_001033324 | ZBTB16            | zinc finger and BTB domain containing 16                              | transcription (regulation) |
| NM_010731    | ZBTB7A            | zinc finger and BTB domain containing 7A                              | transcription (regulation) |
| NM_009565    | ZBTB7B            | zinc finger and BTB domain containing 7B                              | transcription (regulation) |
| NM_001005916 | ZBTB9             | zinc finger and BTB domain containing 9                               | transcription (regulation) |
| NM_134003    | ZC3H10            | zinc finger CCCH-type containing 10                                   | transcription (regulation) |
| NM_172121    | ZC3H3             | zinc finger CCCH-type containing 3                                    | transcription (regulation) |
| NM_198631    | ZC3H4             | zinc finger CCCH-type containing 4                                    | transcription (regulation) |
| NM_028864    | ZC3HAV1           | zinc finger CCCH-type, antiviral 1                                    | transcription (regulation) |

|              |                   |                                                   |                            |
|--------------|-------------------|---------------------------------------------------|----------------------------|
| NM_153160    | ZCCHC17           | zinc finger, CCHC domain containing 17            | transcription (regulation) |
| NM_153538    | ZCCHC6            | zinc finger, CCHC domain containing 6             | transcription (regulation) |
| NM_177027    | ZCCHC7            | zinc finger, CCHC domain containing 7             | transcription (regulation) |
| NM_146073    | ZDHHC14           | zinc finger, DHHC-type containing 14              | transcription (regulation) |
| NM_001017968 | ZDHHC18           | zinc finger, DHHC-type containing 18              | transcription (regulation) |
| NM_199309    | ZDHHC19           | zinc finger, DHHC-type containing 19              | transcription (regulation) |
| NM_199309    | ZDHHC19           | zinc finger, DHHC-type containing 19              | transcription (regulation) |
| NM_015753    | ZEB2              | zinc finger E-box binding homeobox 2              | transcription (regulation) |
| NM_133349    | ZFAND2A           | zinc finger, AN1-type domain 2A                   | transcription (regulation) |
| NM_009551    | ZFAND5            | zinc finger, AN1-type domain 5                    | transcription (regulation) |
| NM_022985    | ZFAND6            | zinc finger, AN1-type domain 6                    | transcription (regulation) |
| NM_007496    | ZFHX3             | zinc finger homeobox 3                            | transcription (regulation) |
| NM_001037665 | ZFP1              | zinc finger protein 1 homolog (mouse)             | transcription (regulation) |
| NM_011756    | ZFP36             | zinc finger protein 36, C3H type, homolog (mouse) | transcription (regulation) |
| NM_007564    | ZFP36L1           | zinc finger protein 36, C3H type-like 1           | transcription (regulation) |
| NM_001001806 | ZFP36L2           | zinc finger protein 36, C3H type-like 2           | transcription (regulation) |
| NM_013843    | ZFP53             | zinc finger protein 53                            | transcription (regulation) |
| NM_172763    | ZFP809            | zinc finger protein 809                           | transcription (regulation) |
| NM_009569    | ZFPM1 (includes E | zinc finger protein, multitype 1                  | transcription (regulation) |
| NM_183154    | ZFYVE1            | zinc finger, FYVE domain containing 1             | transcription (regulation) |
| NM_023685    | ZKSCAN3           | zinc finger with KRAB and SCAN domains 3          | transcription (regulation) |
| NM_025594    | ZMAT2             | zinc finger, matrin type 2                        | transcription (regulation) |
| NM_183208    | ZMIZ1             | zinc finger, MIZ-type containing 1                | transcription (regulation) |
| NM_027230    | ZMYND8            | zinc finger, MYND-type containing 8               | transcription (regulation) |
| NM_001033299 | ZNF217            | zinc finger protein 217                           | transcription (regulation) |
| NM_013866    | ZNF385A           | zinc finger protein 385A                          | transcription (regulation) |
| NM_001113400 | ZNF385B           | zinc finger protein 385B                          | transcription (regulation) |
| NM_020589    | ZNF467            | zinc finger protein 467                           | transcription (regulation) |
| NM_183033    | ZNF516            | zinc finger protein 516                           | transcription (regulation) |
| NM_175751    | ZNF608            | zinc finger protein 608                           | transcription (regulation) |
| NM_172536    | ZNF609            | zinc finger protein 609                           | transcription (regulation) |
| NM_026856    | ZNF644            | zinc finger protein 644                           | transcription (regulation) |
| NM_201609    | ZNF652            | zinc finger protein 652                           | transcription (regulation) |
| NM_030074    | ZNF687            | zinc finger protein 687                           | transcription (regulation) |
| NM_001040686 | ZNF692            | zinc finger protein 692                           | transcription (regulation) |
| NM_133218    | ZNF704            | zinc finger protein 704                           | transcription (regulation) |
| NM_175433    | ZNF710            | zinc finger protein 710                           | transcription (regulation) |

|              |                     |                                                                     |                                  |
|--------------|---------------------|---------------------------------------------------------------------|----------------------------------|
| NM_178763    | ZNF750              | zinc finger protein 750                                             | transcription (regulation)       |
| NM_001037745 | ZNF791              | zinc finger protein 791                                             | transcription (regulation)       |
| NM_001099328 | ZNF831              | zinc finger protein 831                                             | transcription (regulation)       |
| NM_001033196 | ZNFX1               | zinc finger, NFX1-type containing 1                                 | transcription (regulation)       |
| NM_011663    | ZRSR1               | zinc finger (CCCH type), RNA binding motif and serine/arginine rich | transcription (regulation)       |
| NM_145456    | ZSWIM6              | zinc finger, SWIM-type containing 6                                 | transcription (regulation)       |
| NM_011271    | RNASE1              | ribonuclease, RNase A family, 1 (pancreatic)                        | transcription (RNA degradation)  |
| NM_030098    | RNASE6              | ribonuclease, RNase A family, k6                                    | transcription (RNA degradation)  |
| NM_030255    | APOBEC3B            | apolipoprotein B mRNA editing enzyme, catalytic polypeptide-like 3  | transcription (RNA editing)      |
| NM_144826    | UTP6                | UTP6, small subunit (SSU) processome component, homolog (yeast)     | transcription (RNA processing)   |
| NM_008715    | INTS6               | integrator complex subunit 6                                        | transcription (snRNA processing) |
| NM_007713    | CLK3                | CDC-like kinase 3                                                   | transcription (splicing)         |
| NM_001025392 | BCLAF1              | BCL2-associated transcription factor 1                              | transcription regulator          |
| NM_008584    | MEOX2               | mesenchyme homeobox 2                                               | transcription regulator          |
| NM_027973    | MLF1IP              | MLF1 interacting protein                                            | transcription regulator          |
| NM_011842    | MTA2                | metastasis associated 1 family, member 2                            | transcription regulator          |
| NM_054082    | MTA3                | metastasis associated 1 family, member 3                            | transcription regulator          |
| NM_008636    | MTF1                | metal-regulatory transcription factor 1                             | transcription regulator          |
| NM_010753    | MXD4                | MAX dimerization protein 4                                          | transcription regulator          |
| NM_010848    | MYB (includes EGFR) | v-myb myeloblastosis viral oncogene homolog (avian)                 | transcription regulator          |
| NM_008652    | MYBL2               | v-myb myeloblastosis viral oncogene homolog (avian)-like 2          | transcription regulator          |
| NM_010849    | MYC                 | v-myc myelocytomatosis viral oncogene homolog (avian)               | transcription regulator          |
| NM_026495    | NACC2               | NACC family member 2, BEN and BTB (POZ) domain containing           | transcription regulator          |
| NM_172495    | NCOA7               | nuclear receptor coactivator 7                                      | transcription regulator          |
| NM_023739    | NFX1                | nuclear transcription factor, X-box binding 1                       | transcription regulator          |
| NM_001110832 | NFYA                | nuclear transcription factor Y, alpha                               | transcription regulator          |
| NM_008692    | NFYC                | nuclear transcription factor Y, gamma                               | transcription regulator          |
| NM_183248    | NKX6-2              | NK6 homeobox 2                                                      | transcription regulator          |
| NM_153529    | NRN1                | neuritin 1                                                          | transcription regulator          |
| NM_177460    | PARP16              | poly (ADP-ribose) polymerase family, member 16                      | transcription regulator          |
| NM_011037    | PAX2                | paired box 2                                                        | transcription regulator          |
| NM_011040    | PAX8                | paired box 8                                                        | transcription regulator          |
| NM_001042623 | PHC1B               | polyhomeotic homolog 1B (Drosophila)                                | transcription regulator          |
| NM_018774    | PHC2                | polyhomeotic homolog 2 (Drosophila)                                 | transcription regulator          |
| NM_011078    | PHF2                | PHD finger protein 2                                                | transcription regulator          |
| NM_001033225 | PNRC1               | proline-rich nuclear receptor coactivator 1                         | transcription regulator          |
| NM_022318    | POPDC2              | popeye domain containing 2                                          | transcription regulator          |

|              |                        |                                                                            |                         |
|--------------|------------------------|----------------------------------------------------------------------------|-------------------------|
| NM_001081209 | PRDM14                 | PR domain containing 14                                                    | transcription regulator |
| NM_138750    | PROM2                  | prominin 2                                                                 | transcription regulator |
| NM_008943    | PSEN1                  | presenilin 1                                                               | transcription regulator |
| NM_026000    | PSMD9                  | proteasome (prosome, macropain) 26S subunit, non-ATPase, 9                 | transcription regulator |
| NM_008972    | PTMA                   | prothymosin, alpha                                                         | transcription regulator |
| NM_133242    | RBM39                  | RNA binding motif protein 39                                               | transcription regulator |
| NM_001085492 | RERE                   | arginine-glutamic acid dipeptide (RE) repeats                              | transcription regulator |
| NM_009056    | RFX2                   | regulatory factor X, 2 (influences HLA class II expression)                | transcription regulator |
| NM_016698    | RNF10                  | ring finger protein 10                                                     | transcription regulator |
| NM_153049    | MKL1                   | megakaryoblastic leukemia (translocation) 1                                | transcription regulator |
| NM_010813    | MNT                    | MAX binding protein                                                        | transcription regulator |
| NM_010847    | MXI1                   | MAX interactor 1                                                           | transcription regulator |
| NM_016776    | MYBBP1A                | MYB binding protein (P160) 1a                                              | transcription regulator |
| NM_011308    | NCOR1                  | nuclear receptor co-repressor 1                                            | transcription regulator |
| NM_008685    | NFE2                   | nuclear factor (erythroid-derived 2), 45kDa                                | transcription regulator |
| NM_010902    | NFE2L2                 | nuclear factor (erythroid-derived 2)-like 2                                | transcription regulator |
| NM_010905    | NFIA                   | nuclear factor I/A                                                         | transcription regulator |
| NM_011584    | NR1D2                  | nuclear receptor subfamily 1, group D, member 2                            | transcription regulator |
| NM_010938    | NRF1                   | nuclear respiratory factor 1                                               | transcription regulator |
| NM_173440    | NRIP1                  | nuclear receptor interacting protein 1                                     | transcription regulator |
| NM_008739    | NSD1                   | nuclear receptor binding SET domain protein 1                              | transcription regulator |
| NM_010947    | NTN3                   | netrin 3                                                                   | transcription regulator |
| NM_139226    | ONECUT3 (includes EG:) | one cut homeobox 3                                                         | transcription regulator |
| NM_011023    | OTX1                   | orthodenticle homeobox 1                                                   | transcription regulator |
| NM_183355    | PBX1                   | pre-B-cell leukemia homeobox 1                                             | transcription regulator |
| NM_008831    | PHB (includes EG:)     | prohibitin                                                                 | transcription regulator |
| NM_138755    | PHF21A                 | PHD finger protein 21A                                                     | transcription regulator |
| NM_018807    | PLAGL2                 | pleiomorphic adenoma gene-like 2                                           | transcription regulator |
| NM_011137    | POU2F1                 | POU class 2 homeobox 1                                                     | transcription regulator |
| NM_008910    | PPM1A                  | protein phosphatase 1A (formerly 2C), magnesium-dependent, alpha isoenzyme | transcription regulator |
| NM_016891    | PPP2R1A                | protein phosphatase 2 (formerly 2A), regulatory subunit A, alpha isoform   | transcription regulator |
| NM_007548    | PRDM1                  | PR domain containing 1, with ZNF domain                                    | transcription regulator |
| NM_011214    | PTPRU                  | protein tyrosine phosphatase, receptor type, U                             | transcription regulator |
| NM_001025562 | PUS1                   | pseudouridylate synthase 1                                                 | transcription regulator |
| NM_009826    | RB1CC1                 | RB1-inducible coiled-coil 1                                                | transcription regulator |
| NM_019419    | ARL6IP1                | ADP-ribosylation factor-like 6 interacting protein 1                       | translation             |
| NM_001042593 | HBS1L                  | HBS1-like (S. cerevisiae)                                                  | translation             |

|              |                    |                                                                |                                   |
|--------------|--------------------|----------------------------------------------------------------|-----------------------------------|
| NM_201226    | LRRC47             | leucine rich repeat containing 47                              | translation                       |
| NM_021461    | MKNK1              | MAP kinase interacting serine/threonine kinase 1               | translation                       |
| NM_021462    | MKNK2              | MAP kinase interacting serine/threonine kinase 2               | translation                       |
| NM_145433    | MRM1               | mitochondrial rRNA methyltransferase 1 homolog (S. cerevisiae) | translation                       |
| NM_001039084 | MRPL1              | mitochondrial ribosomal protein L1                             | translation                       |
| NM_025553    | MRPL11             | mitochondrial ribosomal protein L11                            | translation                       |
| NM_053162    | MRPL34             | mitochondrial ribosomal protein L34                            | translation                       |
| NM_025500    | MRPL37             | mitochondrial ribosomal protein L37                            | translation                       |
| NM_026851    | MRPL52             | mitochondrial ribosomal protein L52                            | translation                       |
| NM_030116    | MRPL9              | mitochondrial ribosomal protein L9                             | translation                       |
| NM_025369    | MRPS36             | mitochondrial ribosomal protein S36                            | translation                       |
| NM_001142950 | NARS               | asparaginyl-tRNA synthetase                                    | translation                       |
| NM_146169    | PAIP2B             | poly(A) binding protein interacting protein 2B                 | translation                       |
| NM_030722    | PUM1               | pumilio homolog 1 (Drosophila)                                 | translation                       |
| NM_001081054 | QRSL1              | glutaminyl-tRNA synthase (glutamine-hydrolyzing)-like 1        | translation                       |
| NM_029279    | SECISBP2           | SECIS binding protein 2                                        | translation                       |
| NM_010106    | EEF1A1             | eukaryotic translation elongation factor 1 alpha 1             | translation (elongation)          |
| NM_025380    | EEF1E1             | eukaryotic translation elongation factor 1 epsilon 1           | translation (elongation)          |
| NM_007908    | EEF2K              | eukaryotic elongation factor-2 kinase                          | translation (elongation)          |
| NM_175317    | EFTUD1             | elongation factor Tu GTP binding domain containing 1           | translation (elongation)          |
| NM_026603    | DENR (includes E   | density-regulated protein                                      | translation (initiation)          |
| NM_011508    | EIF1               | eukaryotic translation initiation factor 1                     | translation (initiation)          |
| NM_013557    | EIF2AK1            | eukaryotic translation initiation factor 2-alpha kinase 1      | translation (initiation)          |
| NM_153178    | EIF2C2             | eukaryotic translation initiation factor 2C, 2                 | translation (initiation)          |
| NM_080635    | EIF3H              | eukaryotic translation initiation factor 3, subunit H          | translation (initiation)          |
| NM_007918    | EIF4EBP1           | eukaryotic translation initiation factor 4E binding protein 1  | translation (initiation)          |
| NM_145941    | EIF4G1             | eukaryotic translation initiation factor 4 gamma, 1            | translation (initiation)          |
| NM_001040131 | EIF4G2 (includes E | eukaryotic translation initiation factor 4 gamma, 2            | translation (initiation)          |
| NM_172703    | EIF4G3             | eukaryotic translation initiation factor 4 gamma, 3            | translation (initiation)          |
| NM_173363    | EIF5               | eukaryotic translation initiation factor 5                     | translation (initiation)          |
| NM_181582    | EIF5A              | eukaryotic translation initiation factor 5A                    | translation (initiation)          |
| NM_145552    | GNL2               | guanine nucleotide binding protein-like 2 (nucleolar)          | translation (ribosome biogenesis) |
| NM_023536    | MRT04              | mRNA turnover 4 homolog (S. cerevisiae)                        | translation (ribosome biogenesis) |
| NM_010880    | NCL                | nucleolin                                                      | translation (ribosome biogenesis) |
| NM_139236    | NOL6               | nucleolar protein family 6 (RNA-associated)                    | translation (ribosome biogenesis) |
| NM_029278    | NOP14              | NOP14 nucleolar protein homolog (yeast)                        | translation (ribosome biogenesis) |
| NM_028762    | RBM19              | RNA binding motif protein 19                                   | translation (ribosome biogenesis) |

|              |                    |                                                         |                                               |
|--------------|--------------------|---------------------------------------------------------|-----------------------------------------------|
| NM_053183    | DDX50              | DEAD (Asp-Glu-Ala-Asp) box polypeptide 50               | translation (rRNA processing)                 |
| NM_008774    | PABPC1             | poly(A) binding protein, cytoplasmic 1                  | translation (rRNA processing)                 |
| NM_010925    | RRP1               | ribosomal RNA processing 1 homolog (S. cerevisiae)      | translation (rRNA processing)                 |
| NM_023479    | ELAC2              | elaC homolog 2 (E. coli)                                | translation (tRNA processing)                 |
| NM_024274    | FARS2              | phenylalanyl-tRNA synthetase 2, mitochondrial           | translation (tRNA processing)                 |
| NM_026308    | RPP21              | ribonuclease P/MRP 21kDa subunit                        | translation (tRNA processing)                 |
| NM_133982    | RPP25              | ribonuclease P/MRP 25kDa subunit                        | translation (tRNA processing)                 |
| NM_021322    | WDR4 (includes E0  | WD repeat domain 4                                      | translation (tRNA processing)                 |
| NM_030251    | ABTB1              | ankyrin repeat and BTB (POZ) domain containing 1        | translation elongation                        |
| NM_011287    | RPL10A (includes E | ribosomal protein L10A                                  | translation elongation (ribosome constituent) |
| NM_009076    | RPL12 (includes E  | ribosomal protein L12                                   | translation elongation (ribosome constituent) |
| NM_013762    | RPL3               | ribosomal protein L3                                    | translation elongation (ribosome constituent) |
| NM_053257    | RPL31              | ribosomal protein L31                                   | translation elongation (ribosome constituent) |
| NM_172086    | RPL32              | ribosomal protein L32                                   | translation elongation (ribosome constituent) |
| NM_011290    | RPL6               | ribosomal protein L6                                    | translation elongation (ribosome constituent) |
| NM_023133    | RPS19              | ribosomal protein S19                                   | translation elongation (ribosome constituent) |
| NM_024175    | RPS23              | ribosomal protein S23                                   | translation elongation (ribosome constituent) |
| NM_009095    | RPS5               | ribosomal protein S5                                    | translation elongation (ribosome constituent) |
| NM_013454    | ABCA1              | ATP-binding cassette, sub-family A (ABC1), member 1     | transport                                     |
| NM_019552    | ABCB10             | ATP-binding cassette, sub-family B (MDR/TAP), member 10 | transport                                     |
| NM_008830    | ABCB4              | ATP-binding cassette, sub-family B (MDR/TAP), member 4  | transport                                     |
| NM_023732    | ABCB6              | ATP-binding cassette, sub-family B (MDR/TAP), member 6  | transport                                     |
| NM_019875    | ABCB9              | ATP-binding cassette, sub-family B (MDR/TAP), member 9  | transport                                     |
| NM_008576    | ABCC1              | ATP-binding cassette, sub-family C (CFTR/MRP), member 1 | transport                                     |
| NM_001033336 | ABCC4              | ATP-binding cassette, sub-family C (CFTR/MRP), member 4 | transport                                     |
| NM_009593    | ABCG1              | ATP-binding cassette, sub-family G (WHITE), member 1    | transport                                     |
| NM_011920    | ABCG2              | ATP-binding cassette, sub-family G (WHITE), member 2    | transport                                     |
| NM_138955    | ABCG4              | ATP-binding cassette, sub-family G (WHITE), member 4    | transport                                     |
| NM_009597    | ACCN2              | amiloride-sensitive cation channel 2, neuronal          | transport                                     |
| NM_183022    | ACCN4              | amiloride-sensitive cation channel 4, pituitary         | transport                                     |
| NM_181411    | AFTPH              | aftiphilin                                              | transport                                     |
| NM_010472    | AGFG1 (includes E  | ArfGAP with FG repeats 1                                | transport                                     |
| NM_145566    | AGFG2              | ArfGAP with FG repeats 2                                | transport                                     |
| NM_020332    | ANKH               | ankylosis, progressive homolog (mouse)                  | transport                                     |
| NM_178263    | ANKRD27            | ankyrin repeat domain 27 (VPS9 domain)                  | transport                                     |
| NM_175344    | ANO6               | anoctamin 6                                             | transport                                     |
| NM_007454    | AP1B1              | adaptor-related protein complex 1, beta 1 subunit       | transport                                     |



|              |                   |                                                                                   |           |
|--------------|-------------------|-----------------------------------------------------------------------------------|-----------|
| NM_007456    | AP1M1             | adaptor-related protein complex 1, mu 1 subunit                                   | transport |
| NM_001110300 | AP1M2             | adaptor-related protein complex 1, mu 2 subunit                                   | transport |
| NM_183027    | AP1S3 (includes E | adaptor-related protein complex 1, sigma 3 subunit                                | transport |
| NM_007459    | AP2A2             | adaptor-related protein complex 2, alpha 2 subunit                                | transport |
| NM_009692    | APOA1             | apolipoprotein A-I                                                                | transport |
| NM_175105    | AQP11             | aquaporin 11                                                                      | transport |
| NM_009700    | AQP4              | aquaporin 4                                                                       | transport |
| NM_001109045 | AQP8              | aquaporin 8                                                                       | transport |
| NM_022026    | AQP9              | aquaporin 9                                                                       | transport |
| NM_007480    | ARF5              | ADP-ribosylation factor 5                                                         | transport |
| NM_025445    | ARFGAP3           | ADP-ribosylation factor GTPase activating protein 3                               | transport |
| NM_029097    | ATP13A2           | ATPase type 13A2                                                                  | transport |
| NM_144900    | ATP1A1            | ATPase, Na+/K+ transporting, alpha 1 polypeptide                                  | transport |
| NM_178405    | ATP1A2            | ATPase, Na+/K+ transporting, alpha 2 (+) polypeptide                              | transport |
| NM_009721    | ATP1B1            | ATPase, Na+/K+ transporting, beta 1 polypeptide                                   | transport |
| NM_016745    | ATP2A3            | ATPase, Ca++ transporting, ubiquitous                                             | transport |
| NM_026482    | ATP2B1            | ATPase, Ca++ transporting, plasma membrane 1                                      | transport |
| NM_213616    | ATP2B4            | ATPase, Ca++ transporting, plasma membrane 4                                      | transport |
| NM_016920    | ATP6V0A1          | ATPase, H+ transporting, lysosomal V0 subunit a1                                  | transport |
| NM_133826    | ATP6V1H           | ATPase, H+ transporting, lysosomal 50/57kDa, V1 subunit H                         | transport |
| NM_001001488 | ATP8B1            | ATPase, class I, type 8B, member 1                                                | transport |
| NM_026094    | ATP8B3            | ATPase, class I, type 8B, member 3                                                | transport |
| NM_020263    | CACNA2D2          | calcium channel, voltage-dependent, alpha 2/delta subunit 2                       | transport |
| NM_009603    | CHRNE             | cholinergic receptor, nicotinic, epsilon                                          | transport |
| NM_173876    | CLCN3             | chloride channel 3                                                                | transport |
| NM_013885    | CLIC4             | chloride intracellular channel 4                                                  | transport |
| NM_012000    | CLN8              | ceroid-lipofuscinosis, neuronal 8 (epilepsy, progressive with mental retardation) | transport |
| NM_001003908 | CLTC              | clathrin, heavy chain (Hc)                                                        | transport |
| NM_001102471 | CNNM2             | cyclin M2                                                                         | transport |
| NM_133724    | CNO               | cappuccino homolog (mouse)                                                        | transport |
| NM_013581    | COG1              | component of oligomeric golgi complex 1                                           | transport |
| NM_170684    | CPNE7             | copine VII                                                                        | transport |
| NM_011182    | CYTH3             | cytohesin 3                                                                       | transport |
| NM_024207    | DERL1             | Der1-like domain family, member 1                                                 | transport |
| NM_008226    | HCN2              | hyperpolarization activated cyclic nucleotide-gated potassium channel 2           | transport |
| NM_152134    | HOMER1            | homer homolog 1 (Drosophila)                                                      | transport |
| NM_029665    | IPO11             | importin 11                                                                       | transport |

|              |          |                                                                   |           |
|--------------|----------|-------------------------------------------------------------------|-----------|
| NM_023579    | IPO5     | importin 5                                                        | transport |
| NM_019923    | ITPR2    | inositol 1,4,5-triphosphate receptor, type 2                      | transport |
| NM_021566    | JPH2     | junctophilin 2                                                    | transport |
| NM_010599    | KCNAB3   | potassium voltage-gated channel, shaker-related subfamily, beta n | transport |
| NM_008424    | KCNE1    | potassium voltage-gated channel, Isk-related family, member 1     | transport |
| NM_008433    | KCNN4    | potassium intermediate/small conductance calcium-activated chan   | transport |
| NM_001114662 | MFSD4    | major facilitator superfamily domain containing 4                 | transport |
| NM_138670    | MPST     | mercaptopyruvate sulfurtransferase                                | transport |
| NM_010886    | NDUFA4   | NADH dehydrogenase (ubiquinone) 1 alpha subcomplex, 4, 9kDa       | transport |
| NM_001030274 | NDUFS5   | NADH dehydrogenase (ubiquinone) Fe-S protein 5, 15kDa (NADH       | transport |
| NM_025383    | NECAP2   | NECAP endocytosis associated 2                                    | transport |
| NM_010890    | NEDD4    | neural precursor cell expressed, developmentally down-regulated   | transport |
| NM_031881    | NEDD4L   | neural precursor cell expressed, developmentally down-regulated   | transport |
| NM_153578    | NIPA1    | non imprinted in Prader-Willi/Angelman syndrome 1                 | transport |
| NM_175749    | NUP153   | nucleoporin 153kDa                                                | transport |
| NM_021512    | NUP160   | nucleoporin 160kDa                                                | transport |
| NM_175423    | ORAI1    | ORAI calcium release-activated calcium modulator 1                | transport |
| NM_198424    | ORAI3    | ORAI calcium release-activated calcium modulator 3                | transport |
| NM_011016    | ORM1     | orosomucoid 1                                                     | transport |
| NM_027132    | OTOP3    | otopetrin 3                                                       | transport |
| NM_001038887 | P2RX7    | purinergic receptor P2X, ligand-gated ion channel, 7              | transport |
| NM_021517    | PDZK1    | PDZ domain containing 1                                           | transport |
| NM_026018    | PDZK1IP1 | PDZK1 interacting protein 1                                       | transport |
| NM_134025    | PEX12    | peroxisomal biogenesis factor 12                                  | transport |
| NM_175933    | PEX5     | peroxisomal biogenesis factor 5                                   | transport |
| NM_145823    | PITPNC1  | phosphatidylinositol transfer protein, cytoplasmic 1              | transport |
| NM_011256    | PITPNM2  | phosphatidylinositol transfer protein, membrane-associated 2      | transport |
| NM_181544    | PKD1L3   | polycystic kidney disease 1-like 3                                | transport |
| NM_181422    | PKD2L1   | polycystic kidney disease 2-like 1                                | transport |
| NM_016927    | PKD2L2   | polycystic kidney disease 2-like 2                                | transport |
| NM_008859    | PRKCQ    | protein kinase C, theta                                           | transport |
| NM_017382    | RAB11A   | RAB11A, member RAS oncogene family                                | transport |
| NM_024436    | RAB22A   | RAB22A, member RAS oncogene family                                | transport |
| NM_030554    | RAB27B   | RAB27B, member RAS oncogene family                                | transport |
| NM_198163    | RAB35    | RAB35, member RAS oncogene family                                 | transport |
| NM_023852    | RAB3C    | RAB3C, member RAS oncogene family                                 | transport |
| NM_009003    | RAB4A    | RAB4A, member RAS oncogene family                                 | transport |

|              |                  |                                                                     |           |
|--------------|------------------|---------------------------------------------------------------------|-----------|
| NM_019983    | RABGEF1          | RAB guanine nucleotide exchange factor (GEF) 1                      | transport |
| NM_145510    | RABIF            | RAB interacting factor                                              | transport |
| NM_011240    | RANBP2           | RAN binding protein 2                                               | transport |
| NM_027933    | RANBP3           | RAN binding protein 3                                               | transport |
| NM_009034    | RBP2             | retinol binding protein 2, cellular                                 | transport |
| NM_011269    | RHAG             | Rh-associated glycoprotein                                          | transport |
| NM_011270    | RHD              | Rh blood group, D antigen                                           | transport |
| NM_020599    | RLBP1            | retinaldehyde binding protein 1                                     | transport |
| NM_028940    | RLBP1L1          | retinaldehyde binding protein 1-like 1                              | transport |
| NM_178614    | SAMM50           | sorting and assembly machinery component 50 homolog (S. cerevisiae) | transport |
| NM_177547    | SGK3             | serum/glucocorticoid regulated kinase family, member 3              | transport |
| NM_016981    | SLC9A1           | solute carrier family 9 (sodium/hydrogen exchanger), member 1       | transport |
| NM_009303    | SYNGR1           | synaptogyrin 1                                                      | transport |
| NM_009304    | SYNGR2           | synaptogyrin 2                                                      | transport |
| NM_015799    | TFR2             | transferrin receptor 2                                              | transport |
| NM_181321    | TMC6             | transmembrane channel-like 6                                        | transport |
| NM_028011    | TOM1L1           | target of myb1 (chicken)-like 1                                     | transport |
| NM_024214    | TOMM20           | translocase of outer mitochondrial membrane 20 homolog (yeast)      | transport |
| NM_025394    | TOMM7            | translocase of outer mitochondrial membrane 7 homolog (yeast)       | transport |
| NM_172406    | TRAK2            | trafficking protein, kinesin binding 2                              | transport |
| NM_001039104 | TRPM1            | transient receptor potential cation channel, subfamily M, member 1  | transport |
| NM_011706    | TRPV2            | transient receptor potential cation channel, subfamily V, member 2  | transport |
| NM_175274    | TTYH3            | tweety homolog 3 (Drosophila)                                       | transport |
| NM_009464    | UCP3             | uncoupling protein 3 (mitochondrial, proton carrier)                | transport |
| NM_025917    | USE1             | unconventional SNARE in the ER 1 homolog (S. cerevisiae)            | transport |
| NM_009497    | VAMP2            | vesicle-associated membrane protein 2 (synaptobrevin 2)             | transport |
| NM_016794    | VAMP8            | vesicle-associated membrane protein 8 (endobrevin)                  | transport |
| NM_011695    | VDAC2            | voltage-dependent anion channel 2                                   | transport |
| NM_172269    | VPS18            | vacuolar protein sorting 18 homolog (S. cerevisiae)                 | transport |
| NM_177876    | VPS37B           | vacuolar protein sorting 37 homolog B (S. cerevisiae)               | transport |
| NM_001081097 | GRIK3            | glutamate receptor, ionotropic, kainate 3                           | transport |
| NM_008420    | KCNB1            | potassium voltage-gated channel, Shab-related subfamily, member 1   | transport |
| NM_153512    | KCNG3            | potassium voltage-gated channel, subfamily G, member 3              | transport |
| NM_008425    | KCNJ2            | potassium inwardly-rectifying channel, subfamily J, member 2        | transport |
| NM_080466    | KCNN3            | potassium intermediate/small conductance calcium-activated channel  | transport |
| NM_026145    | KCTD10 (includes | potassium channel tetramerisation domain containing 10              | transport |
| NM_172650    | KCTD3            | potassium channel tetramerisation domain containing 3               | transport |

|              |                    |                                                                   |                                              |
|--------------|--------------------|-------------------------------------------------------------------|----------------------------------------------|
| NM_172509    | KCTD7              | potassium channel tetramerisation domain containing 7             | transport                                    |
| NM_008448    | KIF5B              | kinesin family member 5B                                          | transport                                    |
| NM_008640    | LAPTM4A            | lysosomal protein transmembrane 4 alpha                           | transport                                    |
| NM_178780    | RIC3 (includes EG) | resistance to inhibitors of cholinesterase 3 homolog (C. elegans) | transport                                    |
| NM_009406    | TNNI3              | troponin I type 3 (cardiac)                                       | transport                                    |
| NM_011676    | UNC119             | unc-119 homolog (C. elegans)                                      | transport                                    |
| NM_145940    | WIP1               | WD repeat domain, phosphoinositide interacting 1                  | transport                                    |
| NM_201368    | XKR8               | XK, Kell blood group complex subunit-related family, member 8     | transport                                    |
| NM_025797    | CYB5A              | cytochrome b5 type A (microsomal)                                 | transport (electron transport chain)         |
| NM_178086    | FA2H               | fatty acid 2-hydroxylase                                          | transport (electron transport chain)         |
| NM_021890    | FADS3              | fatty acid desaturase 3                                           | transport (electron transport chain)         |
| NM_001113478 | FRRS1              | ferric-chelate reductase 1                                        | transport (electron transport chain)         |
| NM_001045520 | CLINT1             | clathrin interactor 1                                             | transport (endocytosis)                      |
| NM_001080386 | CLTA               | clathrin, light chain (Lca)                                       | transport (endocytosis)                      |
| NM_146122    | DENND1A            | DENN/MADD domain containing 1A                                    | transport (endocytosis)                      |
| NM_001039520 | DNM2               | dynamain 2                                                        | transport (endocytosis)                      |
| NM_010119    | EHD1               | EH-domain containing 1                                            | transport (endocytosis)                      |
| NM_024270    | STARD3NL           | STARD3 N-terminal like                                            | transport (endocytosis)                      |
| NM_011638    | TFRC               | transferrin receptor (p90, CD71)                                  | transport (endocytosis)                      |
| NM_001136259 | TOM1               | target of myb1 (chicken)                                          | transport (endocytosis)                      |
| NM_025516    | ERGIC3             | ERGIC and golgi 3                                                 | transport (ER/Golgi)                         |
| NM_007472    | AQP1               | aquaporin 1 (Colton blood group)                                  | transport (erythroid)                        |
| NM_016689    | AQP3               | aquaporin 3 (Gill blood group)                                    | transport (erythroid)                        |
| NM_010369    | GYPA               | glycophorin A (MNS blood group)                                   | transport (erythroid)                        |
| NM_008221    | HBE1               | hemoglobin, epsilon 1                                             | transport (erythroid)                        |
| NM_175353    | EXOC6              | exocyst complex component 6                                       | transport (exocytosis)                       |
| NM_030725    | SYT13              | synaptotagmin XIII                                                | transport (exocytosis)                       |
| NM_001009573 | UNC13D             | unc-13 homolog D (C. elegans)                                     | transport (exocytosis)                       |
| NM_026700    | DOPEY2             | dopey family member 2                                             | transport (Golgi to endosome, ER)            |
| NM_013546    | HEBP1              | heme binding protein 1                                            | transport (heme binding)                     |
| NM_008379    | KPNB1              | karyopherin (importin) beta 1                                     | transport (into nucleus)                     |
| NM_028758    | GGA2               | golgi associated, gamma adaptin ear containing, ARF binding prot  | transport (intracellular)                    |
| NM_010748    | LYST               | lysosomal trafficking regulator                                   | transport (intracellular)                    |
| NM_009294    | STX4               | syntaxin 4                                                        | transport (intracellular)                    |
| NM_008465    | KPNA1              | karyopherin alpha 1 (importin alpha 5)                            | transport (intracellular), DNA recombination |
| NM_030238    | DYNC1H1            | dynein, cytoplasmic 1, heavy chain 1                              | transport (microtubule-based movement)       |
| NM_029153    | SCAMP1             | secretory carrier membrane protein 1                              | transport (protein)                          |

|              |                              |                                                                               |                            |
|--------------|------------------------------|-------------------------------------------------------------------------------|----------------------------|
| NM_028777    | SEC14L1                      | SEC14-like 1 ( <i>S. cerevisiae</i> )                                         | transport (protein)        |
| NM_001029937 | SEC14L3                      | SEC14-like 3 ( <i>S. cerevisiae</i> )                                         | transport (protein)        |
| NM_001029982 | SEC23IP                      | SEC23 interacting protein                                                     | transport (protein)        |
| NM_028112    | SEH1L                        | SEH1-like ( <i>S. cerevisiae</i> )                                            | transport (protein)        |
| NM_009150    | SELENBP1                     | selenium binding protein 1                                                    | transport (protein)        |
| NM_172926    | SNX14                        | sorting nexin 14                                                              | transport (protein)        |
| NM_026912    | SNX15                        | sorting nexin 15                                                              | transport (protein)        |
| NM_001025612 | SNX22                        | sorting nexin 22                                                              | transport (protein)        |
| NM_017472    | SNX3                         | sorting nexin 3                                                               | transport (protein)        |
| NM_025712    | SNX31                        | sorting nexin 31                                                              | transport (protein)        |
| NM_001024560 | SNX32                        | sorting nexin 32                                                              | transport (protein)        |
| NM_011899    | SRP54                        | signal recognition particle 54kDa                                             | transport (protein)        |
| NM_025965    | SSR1                         | signal sequence receptor, alpha                                               | transport (protein)        |
| NM_011530    | TAP2                         | transporter 2, ATP-binding cassette, sub-family B (MDR/TAP)                   | transport (protein)        |
| NM_013896    | TIMM9                        | translocase of inner mitochondrial membrane 9 homolog (yeast)                 | transport (protein)        |
| NM_026123    | UNC50                        | unc-50 homolog ( <i>C. elegans</i> )                                          | transport (protein)        |
| NM_009194    | SLC12A2                      | solute carrier family 12 (sodium/potassium/chloride transporters), member 2   | transport (solute carrier) |
| NM_019415    | SLC12A3                      | solute carrier family 12 (sodium/chloride transporters), member 3             | transport (solute carrier) |
| NM_009195    | SLC12A4                      | solute carrier family 12 (potassium/chloride transporters), member 4          | transport (solute carrier) |
| NM_172892    | SLC13A4                      | solute carrier family 13 (sodium/sulfate symporters), member 4                | transport (solute carrier) |
| NM_028122    | SLC14A1                      | solute carrier family 14 (urea transporter), member 1 (Kidd blood group)      | transport (solute carrier) |
| NM_053079    | SLC15A1                      | solute carrier family 15 (oligopeptide transporter), member 1                 | transport (solute carrier) |
| NM_028247    | SLC16A10                     | solute carrier family 16, member 10 (aromatic amino acid transporter)         | transport (solute carrier) |
| NM_172371    | SLC16A13                     | solute carrier family 16, member 13 (monocarboxylic acid transporter)         | transport (solute carrier) |
| NM_027921    | SLC16A14                     | solute carrier family 16, member 14 (monocarboxylic acid transporter)         | transport (solute carrier) |
| NM_001077515 | SLC1A2                       | solute carrier family 1 (glial high affinity glutamate transporter), member 2 | transport (solute carrier) |
| NM_148938    | SLC1A3                       | solute carrier family 1 (glial high affinity glutamate transporter), member 3 | transport (solute carrier) |
| NM_015747    | SLC20A1                      | solute carrier family 20 (phosphate transporter), member 1                    | transport (solute carrier) |
| NM_001033167 | SLC22A23                     | solute carrier family 22, member 23                                           | transport (solute carrier) |
| NM_019687    | SLC22A4 (includes SLC22A4)   | solute carrier family 22 (organic cation/ergothioneine transporter), member 4 | transport (solute carrier) |
| NM_008766    | SLC22A6                      | solute carrier family 22 (organic anion transporter), member 6                | transport (solute carrier) |
| NM_194333    | SLC23A3                      | solute carrier family 23 (nucleobase transporters), member 3                  | transport (solute carrier) |
| NM_144813    | SLC24A1                      | solute carrier family 24 (sodium/potassium/calcium exchanger), member 1       | transport (solute carrier) |
| NM_001081048 | SLC25A18 (includes SLC25A18) | solute carrier family 25 (mitochondrial carrier), member 18                   | transport (solute carrier) |
| NM_144793    | SLC25A38                     | solute carrier family 25, member 38                                           | transport (solute carrier) |
| NM_011988    | SLC27A3                      | solute carrier family 27 (fatty acid transporter), member 3                   | transport (solute carrier) |
| NM_022880    | SLC29A1                      | solute carrier family 29 (nucleoside transporters), member 1                  | transport (solute carrier) |

|              |                   |                                                                       |                            |
|--------------|-------------------|-----------------------------------------------------------------------|----------------------------|
| NM_011400    | SLC2A1            | solute carrier family 2 (facilitated glucose transporter), member 1   | transport (solute carrier) |
| NM_011401    | SLC2A3            | solute carrier family 2 (facilitated glucose transporter), member 3   | transport (solute carrier) |
| NM_145559    | SLC2A9            | solute carrier family 2 (facilitated glucose transporter), member 9   | transport (solute carrier) |
| NM_001033286 | SLC30A10          | solute carrier family 30, member 10                                   | transport (solute carrier) |
| NM_080854    | SLC34A3           | solute carrier family 34 (sodium phosphate), member 3                 | transport (solute carrier) |
| NM_029875    | SLC35E3           | solute carrier family 35, member E3                                   | transport (solute carrier) |
| NM_024249    | SLC38A10          | solute carrier family 38, member 10                                   | transport (solute carrier) |
| NM_172479    | SLC38A5           | solute carrier family 38, member 5                                    | transport (solute carrier) |
| NM_001009950 | SLC38A8           | solute carrier family 38, member 8                                    | transport (solute carrier) |
| NM_001135150 | SLC39A8           | solute carrier family 39 (zinc transporter), member 8                 | transport (solute carrier) |
| NM_016917    | SLC40A1           | solute carrier family 40 (iron-regulated transporter), member 1       | transport (solute carrier) |
| NM_001037493 | SLC41A3 (includes | solute carrier family 41, member 3                                    | transport (solute carrier) |
| NM_001083809 | SLC43A1           | solute carrier family 43, member 1                                    | transport (solute carrier) |
| NM_021398    | SLC43A3           | solute carrier family 43, member 3                                    | transport (solute carrier) |
| NM_152808    | SLC44A2           | solute carrier family 44, member 2                                    | transport (solute carrier) |
| NM_001081263 | SLC44A5           | solute carrier family 44, member 5                                    | transport (solute carrier) |
| NM_145977    | SLC45A3           | solute carrier family 45, member 3                                    | transport (solute carrier) |
| NM_001033219 | SLC45A4           | solute carrier family 45, member 4                                    | transport (solute carrier) |
| NM_021053    | SLC46A2           | solute carrier family 46, member 2                                    | transport (solute carrier) |
| NM_026353    | SLC48A1           | solute carrier family 48 (heme transporter), member 1                 | transport (solute carrier) |
| NM_011403    | SLC4A1            | solute carrier family 4, anion exchanger, member 1 (erythrocyte m     | transport (solute carrier) |
| NM_008135    | SLC6A9            | solute carrier family 6 (neurotransmitter transporter, glycine), mem  | transport (solute carrier) |
| NM_011990    | SLC7A11           | solute carrier family 7, (cationic amino acid transporter, y+ system) | transport (solute carrier) |
| NM_011404    | SLC7A5            | solute carrier family 7 (cationic amino acid transporter, y+ system)  | transport (solute carrier) |
| NM_194464    | MRV11             | murine retrovirus integration site 1 homolog                          | tumor supressor gene       |
| NM_001081317 | ANUBL1            | AN1, ubiquitin-like, homolog (Xenopus laevis)                         | ubiquitination             |
| NM_175206    | FBXL22 (includes  | F-box and leucine-rich repeat protein 22                              | ubiquitination             |
| NM_001081034 | FBXO11            | F-box protein 11                                                      | ubiquitination             |
| NM_176848    | FBXO2             | F-box protein 2                                                       | ubiquitination             |
| NM_020593    | FBXO3             | F-box protein 3                                                       | ubiquitination             |
| NM_176982    | FBXO48            | F-box protein 48                                                      | ubiquitination             |
| NM_013908    | FBXW5             | F-box and WD repeat domain containing 5                               | ubiquitination             |
| NM_080428    | FBXW7             | F-box and WD repeat domain containing 7                               | ubiquitination             |
| NM_010192    | FEM1A             | fem-1 homolog a (C. elegans)                                          | ubiquitination             |
| NM_001081151 | GAN               | gigaxonin                                                             | ubiquitination             |
| NM_010295    | GCLC              | glutamate-cysteine ligase, catalytic subunit                          | ubiquitination             |
| NM_172473    | HACE1             | HECT domain and ankyrin repeat containing, E3 ubiquitin protein l     | ubiquitination             |

|              |                   |                                                                 |                |
|--------------|-------------------|-----------------------------------------------------------------|----------------|
| NM_144788    | HECTD1            | HECT domain containing 1                                        | ubiquitination |
| NM_001081348 | HECW1             | HECT, C2 and WW domain containing E3 ubiquitin protein ligase 1 | ubiquitination |
| NM_026580    | OTUB2             | OTU domain, ubiquitin aldehyde binding 2                        | ubiquitination |
| NM_030743    | RNF114            | ring finger protein 114                                         | ubiquitination |
| NM_026301    | RNF125            | ring finger protein 125                                         | ubiquitination |
| NM_175226    | RNF139            | ring finger protein 139                                         | ubiquitination |
| NM_025607    | RNF181            | ring finger protein 181                                         | ubiquitination |
| NM_013923    | RNF19A            | ring finger protein 19A                                         | ubiquitination |
| NM_023738    | UBA7              | ubiquitin-like modifier activating enzyme 7                     | ubiquitination |
| NM_133835    | UBAC1             | UBA domain containing 1                                         | ubiquitination |
| NM_177823    | UBASH3A           | ubiquitin associated and SH3 domain containing, A               | ubiquitination |
| NM_176860    | UBASH3B           | ubiquitin associated and SH3 domain containing, B               | ubiquitination |
| NM_011664    | UBB               | ubiquitin B                                                     | ubiquitination |
| NM_019639    | UBC               | ubiquitin C                                                     | ubiquitination |
| NM_025356    | UBE2D3            | ubiquitin-conjugating enzyme E2D 3 (UBC4/5 homolog, yeast)      | ubiquitination |
| NM_026454    | UBE2F             | ubiquitin-conjugating enzyme E2F (putative)                     | ubiquitination |
| NM_019803    | UBE2G2            | ubiquitin-conjugating enzyme E2G 2 (UBC7 homolog, yeast)        | ubiquitination |
| NM_009459    | UBE2H (includes E | ubiquitin-conjugating enzyme E2H (UBC8 homolog, yeast)          | ubiquitination |
| NM_019949    | UBE2L6            | ubiquitin-conjugating enzyme E2L 6                              | ubiquitination |
| NM_023230    | UBE2V1            | ubiquitin-conjugating enzyme E2 variant 1                       | ubiquitination |
| NM_011668    | UBE3A             | ubiquitin protein ligase E3A                                    | ubiquitination |
| NM_024475    | UBLCP1            | ubiquitin-like domain containing CTD phosphatase 1              | ubiquitination |
| NM_080562    | UBOX5             | U-box domain containing 5                                       | ubiquitination |
| NM_144873    | UHRF2             | ubiquitin-like with PHD and ring finger domains 2               | ubiquitination |
| NM_009462    | USP10             | ubiquitin specific peptidase 10                                 | ubiquitination |
| NM_011669    | USP12             | ubiquitin specific peptidase 12                                 | ubiquitination |
| NM_001038589 | USP14             | ubiquitin specific peptidase 14 (tRNA-guanine transglycosylase) | ubiquitination |
| NM_027604    | USP15             | ubiquitin specific peptidase 15                                 | ubiquitination |
| NM_028846    | USP20             | ubiquitin specific peptidase 20                                 | ubiquitination |
| NM_144937    | USP3              | ubiquitin specific peptidase 3                                  | ubiquitination |
| NM_001029934 | USP32             | ubiquitin specific peptidase 32                                 | ubiquitination |
| NM_001033291 | USP40             | ubiquitin specific peptidase 40                                 | ubiquitination |
| NM_152825    | USP45             | ubiquitin specific peptidase 45                                 | ubiquitination |
| NM_009481    | USP9X             | ubiquitin specific peptidase 9, X-linked                        | ubiquitination |
| NM_178694    | ZER1              | zer-1 homolog (C. elegans)                                      | ubiquitination |
| NM_029967    | ADAMTSL1          | ADAMTS-like 1                                                   |                |
| NM_025629    | ADAMTSL5          | ADAMTS-like 5                                                   |                |

|              |                    |                                                                  |
|--------------|--------------------|------------------------------------------------------------------|
| NM_178873    | ADCK2              | aarF domain containing kinase 2                                  |
| NM_026203    | AHI1               | Abelson helper integration site 1                                |
| NM_009643    | AHNAK              | AHNAK nucleoprotein (desmoyokin)                                 |
| NM_172393    | AIM1 (includes EG) | absent in melanoma 1                                             |
| NR_002853    | AIR                | Acute insulin response (2)                                       |
| NM_028070    | ALKBH4             | alkB, alkylation repair homolog 4 (E. coli)                      |
| NM_026303    | ALKBH8             | alkB, alkylation repair homolog 8 (E. coli)                      |
| NM_144524    | ANGEL1             | angel homolog 1 (Drosophila)                                     |
| NM_175375    | ANKHD1             | ankyrin repeat and KH domain containing 1                        |
| NM_023472    | ANKRA2             | ankyrin repeat, family A (RFXANK-like), 2                        |
| NM_026718    | ANKRD13A           | ankyrin repeat domain 13A                                        |
| NM_146024    | ANKRD40            | ankyrin repeat domain 40                                         |
| NM_001012450 | ANKRD6             | ankyrin repeat domain 6                                          |
| NM_175207    | ANKRD9             | ankyrin repeat domain 9                                          |
| NM_009672    | ANP32A             | acidic (leucine-rich) nuclear phosphoprotein 32 family, member A |
| NM_173743    | APOL9B             | apolipoprotein L 9b                                              |
| NM_001034858 | ARMC2              | armadillo repeat containing 2                                    |
| NM_027560    | ARRDC2             | arrestin domain containing 2                                     |
| NM_001042591 | ARRDC3             | arrestin domain containing 3                                     |
| NM_183020    | ATXN2L             | ataxin 2-like                                                    |
| NM_028139    | ATXN7L1            | ataxin 7-like 1                                                  |
| NM_172661    | BAT2L              | HLA-B associated transcript 2-like                               |
| NM_138681    | BCAS3              | breast carcinoma amplified sequence 3                            |
| NM_175277    | BOLA3              | bolA homolog 3 (E. coli)                                         |
| NM_177472    | BTBD12             | BTB (POZ) domain containing 12                                   |
| NM_013483    | BTN1A1             | butyrophilin, subfamily 1, member A1                             |
| NM_013535    | C12ORF57           | chromosome 12 open reading frame 57                              |
| NM_001033236 | C14ORF138          | chromosome 14 open reading frame 138                             |
| NM_199310    | C15ORF57           | chromosome 15 open reading frame 57                              |
| NM_181569    | C16ORF35           | chromosome 16 open reading frame 35                              |
| NM_183175    | C1QTNF9            | C1q and tumor necrosis factor related protein 9                  |
| NM_133781    | CAB39              | calcium binding protein 39                                       |
| NM_133746    | CALHM2             | calcium homeostasis modulator 2                                  |
| NM_001033533 | CCDC102A           | coiled-coil domain containing 102A                               |
| NM_028312    | CCDC12             | coiled-coil domain containing 12                                 |
| NM_027346    | CCDC44             | coiled-coil domain containing 44                                 |
| NM_183307    | CCDC63             | coiled-coil domain containing 63                                 |



|              |                   |                                                                                        |  |
|--------------|-------------------|----------------------------------------------------------------------------------------|--|
| NM_026439    | CCDC80            | coiled-coil domain containing 80                                                       |  |
| NM_026681    | CCDC88C           | coiled-coil domain containing 88C                                                      |  |
| NM_001136471 | CCDC9             | coiled-coil domain containing 9                                                        |  |
| NM_009846    | CD24              | CD24 molecule                                                                          |  |
| NM_007652    | CD59A             | CD59a antigen                                                                          |  |
| NM_133974    | CDCP1             | CUB domain containing protein 1                                                        |  |
| NM_025496    | CDRT4             | CMT1A duplicated region transcript 4                                                   |  |
| NM_172260    | CEP68             | centrosomal protein 68kDa                                                              |  |
| NM_023873    | CEP70             | centrosomal protein 70kDa                                                              |  |
| NM_025336    | CHCHD3            | coiled-coil-helix-coiled-coil-helix domain containing 3                                |  |
| NM_007705    | CIRBP             | cold inducible RNA binding protein                                                     |  |
| NM_025902    | CISD2             | CDGSH iron sulfur domain 2                                                             |  |
| NM_181589    | CKAP2L            | cytoskeleton associated protein 2-like                                                 |  |
| NM_001081114 | CLIP3             | CAP-GLY domain containing linker protein 3                                             |  |
| NM_009191    | CLPB              | ClpB caseinolytic peptidase B homolog (E. coli)                                        |  |
| NM_172974    | COPS7B            | COP9 constitutive photomorphogenic homolog subunit 7B (Arabidopsis)                    |  |
| NM_139130    | CORO6             | coronin 6                                                                              |  |
| NM_170597    | CREG2             | cellular repressor of E1A-stimulated genes 2                                           |  |
| NM_018776    | CRLF3 (includes E | cytokine receptor-like factor 3                                                        |  |
| NM_146034    | CTAGE5            | CTAGE family, member 5                                                                 |  |
| NM_026295    | CTDP1             | CTD (carboxy-terminal domain, RNA polymerase II, polypeptide A) phosphatase, subunit 1 |  |
| NM_133687    | CXXC5             | CXXC finger 5                                                                          |  |
| NM_011722    | DCTN6             | dynactin 6                                                                             |  |
| NM_174854    | DISC1             | disrupted in schizophrenia 1                                                           |  |
| NM_173383    | DND1              | dead end homolog 1 (zebrafish)                                                         |  |
| NM_001081954 | DUX               | double homeobox                                                                        |  |
| NM_026626    | EFCAB2            | EF-hand calcium binding domain 2                                                       |  |
| NM_001081046 | EFCAB3            | EF-hand calcium binding domain 3                                                       |  |
| NM_001033464 | EFCAB4B           | EF-hand calcium binding domain 4B                                                      |  |
| NM_025994    | EFHD2             | EF-hand domain family, member D2                                                       |  |
| NM_152922    | EGFL8             | EGF-like-domain, multiple 8                                                            |  |
| NM_007930    | ENC1              | ectodermal-neural cortex (with BTB-like domain)                                        |  |
| NM_022313    | ERAL1             | Era G-protein-like 1 (E. coli)                                                         |  |
| NM_026983    | ERP27             | endoplasmic reticulum protein 27 kDa                                                   |  |
| NM_026576    | ETAA1             | Ewing tumor-associated antigen 1                                                       |  |
| NR_015349    | ETOHD2            | ethanol decreased 2                                                                    |  |
| NM_027698    | EXOD1             | exoribonuclease 2                                                                      |  |

|              |                   |                                                                    |
|--------------|-------------------|--------------------------------------------------------------------|
| NM_177391    | FAM109B           | family with sequence similarity 109, member B                      |
| NM_146127    | FAM110A           | family with sequence similarity 110, member A                      |
| NM_027828    | FAM110C           | family with sequence similarity 110, member C                      |
| NM_172293    | FAM113B           | family with sequence similarity 113, member B                      |
| NM_026520    | FAM122A           | family with sequence similarity 122A                               |
| NM_175184    | FAM125B           | family with sequence similarity 125, member B                      |
| NM_146084    | FAM13B1           | family with sequence similarity 13, member B1                      |
| NM_033146    | FAM158A           | family with sequence similarity 158, member A                      |
| NM_027342    | FAM162A           | family with sequence similarity 162, member A                      |
| NM_001013811 | FAM169B (includes | family with sequence similarity 169, member B                      |
| NM_145413    | FAM20B            | family with sequence similarity 20, member B                       |
| NM_138587    | FAM3C             | family with sequence similarity 3, member C                        |
| NM_029758    | FAM49A            | family with sequence similarity 49, member A                       |
| NM_144846    | FAM49B            | family with sequence similarity 49, member B                       |
| NM_178390    | FAM53A            | family with sequence similarity 53, member A                       |
| NM_175268    | FAM53B            | family with sequence similarity 53, member B                       |
| NM_030069    | FAM55B            | family with sequence similarity 55, member B                       |
| NM_001033445 | FAM59A            | family with sequence similarity 59, member A                       |
| NM_028731    | FAM62B            | family with sequence similarity 62 (C2 domain containing) member B |
| NM_001081241 | FAM65A            | family with sequence similarity 65, member A                       |
| NM_026062    | FAM69A            | family with sequence similarity 69, member A                       |
| NM_001033136 | FAM82A2           | family with sequence similarity 82, member A2                      |
| NM_027975    | FAM83D            | family with sequence similarity 83, member D                       |
| NM_178618    | FAM83G            | family with sequence similarity 83, member G                       |
| NM_001033980 | FAM92B            | family with sequence similarity 92, member B                       |
| NM_133999    | FIG4              | FIG4 homolog (S. cerevisiae)                                       |
| NR_002840    | GAS5              | growth arrest-specific 5 (non-protein coding)                      |
| NM_027450    | GLIPR2            | GLI pathogenesis-related 2                                         |
| NM_008132    | GLRP1             | glutamine repeat protein 1                                         |
| NM_001033403 | GM1968            | gene model 1968, (NCBI)                                            |
| NM_001085505 | GM572             | gene model 572, (NCBI)                                             |
| NM_001033414 | GM833             | gene model 833, (NCBI)                                             |
| NM_025673    | GOLPH3            | golgi phosphoprotein 3 (coat-protein)                              |
| NM_153528    | GRAMD1C           | GRAM domain containing 1C                                          |
| NM_011938    | GRK6              | G protein-coupled receptor kinase 6                                |
| NM_031378    | GSDMC             | gasdermin C                                                        |
| NM_001081076 | GUCY2G (includes  | guanylate cyclase 2g                                               |

|              |                   |                                                                  |
|--------------|-------------------|------------------------------------------------------------------|
| NM_026812    | HDDC3             | HD domain containing 3                                           |
| NM_020586    | HERPUD2           | HERPUD family member 2                                           |
| NM_001024720 | HMCN1 (includes E | hemicentin 1                                                     |
| NM_010439    | HMG1L1            | high-mobility group box 1-like 1                                 |
| NM_198937    | HN1L              | hematological and neurological expressed 1-like                  |
| NM_021429    | HS1BP3            | HCLS1 binding protein 3                                          |
| NM_010499    | IER2              | immediate early response 2                                       |
| NM_010500    | IER5              | immediate early response 5                                       |
| NM_030244    | IER5L             | immediate early response 5-like                                  |
| NM_008331    | IFIT1L            | interferon-induced protein with tetratricopeptide repeats 1-like |
| NM_025903    | IFRD2             | interferon-related developmental regulator 2                     |
| NM_207205    | IGSF3             | immunoglobulin superfamily, member 3                             |
| NM_172625    | INO80C            | INO80 complex subunit C                                          |
| NM_175515    | INTU              | inturned planar cell polarity effector homolog (Drosophila)      |
| NM_177193    | ISLR2             | immunoglobulin superfamily containing leucine-rich repeat 2      |
| NM_028001    | JSRP1             | junctional sarcoplasmic reticulum protein 1                      |
| NM_153572    | KATNAL1           | katanin p60 subunit A-like 1                                     |
| NM_178929    | KAZALD1           | Kazal-type serine peptidase inhibitor domain 1                   |
| NM_027117    | KLHDC2            | kelch domain containing 2                                        |
| NM_145479    | KLHL22            | kelch-like 22 (Drosophila)                                       |
| NM_182782    | KLHL25            | kelch-like 25 (Drosophila)                                       |
| NM_026448    | KLHL7             | kelch-like 7 (Drosophila)                                        |
| NM_030599    | KLRB1B (includes  | killer cell lectin-like receptor subfamily B member 1B           |
| NM_010684    | LAMP1             | lysosomal-associated membrane protein 1                          |
| NM_001040399 | LARP2 (includes E | La ribonucleoprotein domain family, member 2                     |
| NM_001024526 | LARP4             | La ribonucleoprotein domain family, member 4                     |
| NM_133815    | LBR               | lamin B receptor                                                 |
| NM_175036    | LEPROT            | leptin receptor overlapping transcript                           |
| NM_020295    | LMBR1             | limb region 1 homolog (mouse)                                    |
| NM_008377    | LRIG1             | leucine-rich repeats and immunoglobulin-like domains 1           |
| NM_172784    | LRP11             | low density lipoprotein receptor-related protein 11              |
| NM_153542    | LRRC20            | leucine rich repeat containing 20                                |
| NM_153074    | LRRC25            | leucine rich repeat containing 25                                |
| NM_199149    | LRRC68 (includes  | leucine rich repeat containing 68                                |
| NM_001033550 | LRRC8B            | leucine rich repeat containing 8 family, member B                |
| NM_133897    | LRRC8C            | leucine rich repeat containing 8 family, member C                |
| NM_148947    | LY6G5C            | lymphocyte antigen 6 complex, locus G5C                          |

|              |                   |                                                                                       |
|--------------|-------------------|---------------------------------------------------------------------------------------|
| NM_027366    | LY6G6E            | lymphocyte antigen 6 complex, locus G6E                                               |
| NM_182785    | LYPD4             | LY6/PLAUR domain containing 4                                                         |
| NM_033322    | LZTFL1            | leucine zipper transcription factor-like 1                                            |
| NM_134147    | MACROD1           | MACRO domain containing 1                                                             |
| NR_002847    | MALAT1            | metastasis associated lung adenocarcinoma transcript 1 (non-protein coding)           |
| NM_020007    | MBNL1             | muscleblind-like (Drosophila)                                                         |
| NM_173189    | MCPH1             | microcephalin 1                                                                       |
| NM_001039214 | MEX3C             | mex-3 homolog C (C. elegans)                                                          |
| NM_173015    | MON1B             | MON1 homolog B (yeast)                                                                |
| NM_001081100 | MORN1             | MORN repeat containing 1                                                              |
| NM_020597    | MSMB              | microseminoprotein, beta-                                                             |
| NM_013602    | MT1F              | metallothionein 1F                                                                    |
| NM_133898    | N4BP2L1           | NEDD4 binding protein 2-like 1                                                        |
| NM_001111016 | NAV2 (includes EG | neuron navigator 2                                                                    |
| NM_134009    | NCLN              | nicalin homolog (zebrafish)                                                           |
| NM_024193    | NOL5A             | nucleolar protein 5A (56kDa with KKE/D repeat)                                        |
| NM_024193    | NOL5A             | nucleolar protein 5A (56kDa with KKE/D repeat)                                        |
| NM_001109985 | NOS1AP            | nitric oxide synthase 1 (neuronal) adaptor protein                                    |
| NM_145469    | NPAL2             | NIPA-like domain containing 2                                                         |
| NM_001007462 | PABPNL1 (includes | poly(A)binding protein nuclear-like 1                                                 |
| NM_198410    | PAQR6             | progesterone and adipoQ receptor family member VI                                     |
| NM_027995    | PAQR7             | progesterone and adipoQ receptor family member VII                                    |
| NM_198414    | PAQR9             | progesterone and adipoQ receptor family member IX                                     |
| NM_181402    | PARP11            | poly (ADP-ribose) polymerase family, member 11                                        |
| NM_145981    | PHYHIP            | phytanoyl-CoA 2-hydroxylase interacting protein                                       |
| NM_138674    | PKHD1L1           | polycystic kidney and hepatic disease 1 (autosomal recessive)-like 1                  |
| NM_182930    | PLEKHA6           | pleckstrin homology domain containing, family A member 6                              |
| NM_177606    | PLEKHH2           | pleckstrin homology domain containing, family H (with MyTH4 domain) member 2          |
| NM_153119    | PLEKHO2           | pleckstrin homology domain containing, family O member 2                              |
| NM_032398    | PLVAP             | plasmalemma vesicle associated protein                                                |
| NM_025861    | PQLC1             | PQ loop repeat containing 1                                                           |
| NM_001114119 | QRICH1            | glutamine-rich 1                                                                      |
| NM_181750    | R3HDM1            | R3H domain containing 1                                                               |
| NM_144538    | RAB3IL1           | RAB3A interacting protein (rabin3)-like 1                                             |
| NM_134083    | RCBTB2            | regulator of chromosome condensation (RCC1) and BTB (POZ) domain containing protein 2 |
| NM_001038846 | RCSD1             | RCSD domain containing 1                                                              |
| NM_025654    | RDM1              | RAD52 motif 1                                                                         |

|              |                   |                                                              |
|--------------|-------------------|--------------------------------------------------------------|
| NM_178606    | REEP3             | receptor accessory protein 3                                 |
| NM_139292    | REEP6             | receptor accessory protein 6                                 |
| NM_026328    | REG4              | regenerating islet-derived family, member 4                  |
| NM_025852    | REXO1             | REX1, RNA exonuclease 1 homolog (S. cerevisiae)              |
| NM_181397    | RFTN1             | raftlin, lipid raft linker 1                                 |
| NM_146218    | RFWD3             | ring finger and WD repeat domain 3                           |
| NM_172572    | RHBDF2            | rhomboid 5 homolog 2 (Drosophila)                            |
| NR_002841    | RN4.5S            | 4.5S RNA                                                     |
| NM_028862    | RNF145            | ring finger protein 145                                      |
| NM_027934    | RNF180            | ring finger protein 180                                      |
| NM_025739    | RNF220            | ring finger protein 220                                      |
| NM_134064    | RNF44             | ring finger protein 44                                       |
| NR_002865    | RNU11             | RNA, U11 small nuclear                                       |
| NR_004432    | RNU12             | RNA, U12 small nuclear                                       |
| NM_133185    | ROGDI             | rogdi homolog (Drosophila)                                   |
| NM_027434    | RPRD1B            | regulation of nuclear pre-mRNA domain containing 1B          |
| NM_001080977 | RSBN1L            | round spermatid basic protein 1-like                         |
| NM_028456    | RWDD3             | RWD domain containing 3                                      |
| NM_146025    | SAMD14            | sterile alpha motif domain containing 14                     |
| NM_175021    | SAMD4B            | sterile alpha motif domain containing 4B                     |
| NM_029489    | SAMD7             | sterile alpha motif domain containing 7                      |
| NM_023380    | SAMSN1            | SAM domain, SH3 domain and nuclear localization signals 1    |
| NM_027805    | SAPS2             | SAPS domain family, member 2                                 |
| NM_022886    | SCEL              | sciellin                                                     |
| NM_013928    | SCHIP1            | schwannomin interacting protein 1                            |
| NM_019708    | SCOC              | short coiled-coil protein                                    |
| NM_029756    | SDCCAG8           | serologically defined colon cancer antigen 8                 |
| NM_029100    | SEPN1 (includes E | selenoprotein N, 1                                           |
| NM_025867    | SERPINB11         | serpin peptidase inhibitor, clade B (ovalbumin), member 11   |
| NM_011454    | SERPINB6B         | serine (or cysteine) peptidase inhibitor, clade B, member 6b |
| NM_028385    | SETD5             | SET domain containing 5                                      |
| NM_030207    | SFI1              | Sfi1 homolog, spindle assembly associated (yeast)            |
| NM_024480    | SH3BP5L           | SH3-binding domain protein 5-like                            |
| NM_025340    | SHARPIN           | SHANK-associated RH domain interactor                        |
| NM_181590    | SHQ1              | SHQ1 homolog (S. cerevisiae)                                 |
| NM_001029841 | SLA               | Src-like-adaptor                                             |
| NM_172796    | SLFN13            | schlafen family member 13                                    |

|              |                   |                                                             |
|--------------|-------------------|-------------------------------------------------------------|
| NM_183201    | SLFN5             | schlafen family member 5                                    |
| NM_024230    | SMTNL1            | smoothelin-like 1                                           |
| NM_177776    | SMTNL2 (includes  | smoothelin-like 2                                           |
| NR_003145    | SNHG10 (includes  | small nucleolar RNA host gene (non-protein coding) 10       |
| NR_003270    | SNHG3             | small nucleolar RNA host gene 3 (non-protein coding)        |
| NM_175318    | SPTY2D1           | SPT2, Suppressor of Ty, domain containing 1 (S. cerevisiae) |
| NM_001100110 | SRP54C            | signal recognition particle 54C                             |
| NM_009274    | SRPK2             | SFRS protein kinase 2                                       |
| NM_001083315 | ST7               | suppression of tumorigenicity 7                             |
| NM_019990    | STARD10           | StAR-related lipid transfer (START) domain containing 10    |
| NM_023231    | STOML2            | stomatin (EPB72)-like 2                                     |
| NM_027890    | SUSD2             | sushi domain containing 2                                   |
| NM_025491    | SUSD3             | sushi domain containing 3                                   |
| NM_146008    | TCP11L2           | t-complex 11 (mouse)-like 2                                 |
| NM_025329    | TCTEX1D2          | Tctex1 domain containing 2                                  |
| NR_001579    | TERC (includes EC | telomerase RNA component                                    |
| NM_207176    | TES               | testis derived transcript (3 LIM domains)                   |
| NM_001040400 | TET2              | tet oncogene family member 2                                |
| NM_009388    | TKT               | transketolase                                               |
| NM_027249    | TLCD2             | TLC domain containing 2                                     |
| NM_026281    | TM7SF3            | transmembrane 7 superfamily member 3                        |
| NM_027154    | TMBIM1            | transmembrane BAX inhibitor motif containing 1              |
| NM_178874    | TMCC2             | transmembrane and coiled-coil domain family 2               |
| NM_172051    | TMCC3             | transmembrane and coiled-coil domain family 3               |
| NM_026104    | TMCO5A            | transmembrane and coiled-coil domains 5A                    |
| NM_025838    | TMEM107           | transmembrane protein 107                                   |
| NM_001039723 | TMEM120B          | transmembrane protein 120B                                  |
| NM_018872    | TMEM131           | transmembrane protein 131                                   |
| NM_001034863 | TMEM136 (include  | transmembrane protein 136                                   |
| NM_145580    | TMEM149           | transmembrane protein 149                                   |
| NM_025387    | TMEM14C           | transmembrane protein 14C                                   |
| NM_144916    | TMEM150           | transmembrane protein 150                                   |
| NM_177260    | TMEM154           | transmembrane protein 154                                   |
| NM_175187    | TMEM161B          | transmembrane protein 161B                                  |
| NM_177592    | TMEM164           | transmembrane protein 164                                   |
| NM_026198    | TMEM167B          | transmembrane protein 167B                                  |
| NM_026325    | TMEM179B          | transmembrane protein 179B                                  |

|              |                   |                                                            |
|--------------|-------------------|------------------------------------------------------------|
| NM_144914    | TMEM184A          | transmembrane protein 184A                                 |
| NM_025708    | TMEM186           | transmembrane protein 186                                  |
| NM_178577    | TMEM205           | transmembrane protein 205                                  |
| NM_025667    | TMEM222           | transmembrane protein 222                                  |
| NM_144805    | TMEM40            | transmembrane protein 40                                   |
| NM_026837    | TMEM53            | transmembrane protein 53                                   |
| NM_023440    | TMEM86B           | transmembrane protein 86B                                  |
| NM_177124    | TNRC6B            | trinucleotide repeat containing 6B                         |
| NM_030706    | TRIM2             | tripartite motif-containing 2                              |
| NM_020267    | TRIM44            | tripartite motif-containing 44                             |
| NM_001081281 | TRIM55            | tripartite motif-containing 55                             |
| NM_201373    | TRIM56            | tripartite motif-containing 56                             |
| NM_001039047 | TRIM58            | tripartite motif-containing 58                             |
| NM_025863    | TRIM59            | tripartite motif-containing 59                             |
| NM_053166    | TRIM7             | tripartite motif-containing 7                              |
| NM_053100    | TRIM8             | tripartite motif-containing 8                              |
| NM_201357    | TSSC1             | tumor suppressing subtransferable candidate 1              |
| NM_153392    | TTC39A            | tetratricopeptide repeat domain 39A                        |
| NM_001080769 | UHRF1BP1          | UHRF1 binding protein 1                                    |
| NM_029166    | UHRF1BP1L         | UHRF1 binding protein 1-like                               |
| NM_172569    | UNK               | unkempt homolog (Drosophila)                               |
| NM_028789    | UNKL (includes EG | unkempt-like (Drosophila)                                  |
| NM_028357    | VEPH1             | ventricular zone expressed PH domain homolog 1 (zebrafish) |
| NM_001102582 | VMN2R18           | vomer nasal 2, receptor 18                                 |
| NR_003555    | VMN2R29           | vomer nasal 2, receptor 29                                 |
| NM_177184    | VPS13C            | vacuolar protein sorting 13 homolog C (S. cerevisiae)      |
| NM_001128198 | VPS13D            | vacuolar protein sorting 13 homolog D (S. cerevisiae)      |
| NM_001081366 | VPS8              | vacuolar protein sorting 8 homolog (S. cerevisiae)         |
| NM_182636    | VWA5B2            | von Willebrand factor A domain containing 5B2              |
| NM_001004436 | WAPAL             | wings apart-like homolog (Drosophila)                      |
| NM_016852    | WBP2              | WW domain binding protein 2                                |
| NM_172882    | WDFY3             | WD repeat and FYVE domain containing 3                     |
| NM_172598    | WDHD1             | WD repeat and HMG-box DNA binding protein 1                |
| NM_145514    | WDR26             | WD repeat domain 26                                        |
| NM_175173    | WDR27             | WD repeat domain 27                                        |
| NM_001008498 | WDR34             | WD repeat domain 34                                        |
| NM_026893    | WDR40A            | WD repeat domain 40A                                       |

|              |       |                                  |  |
|--------------|-------|----------------------------------|--|
| NM_030234    | WDR76 | WD repeat domain 76              |  |
| NM_178363    | YLPM1 | YLP motif containing 1           |  |
| NM_001005342 | YPEL4 | yippee-like 4 (Drosophila)       |  |
| NM_153566    | YRDC  | yrdC domain containing (E. coli) |  |













sduction

iesis  
steins)  
steins)  
steins)

steins)

steins)

j)

j)
